# Supplementary material
Source: PubMed Central journal article supplement (PMC9179088)
Supplement: NIHMS1794363-supplement-Supplementary_Information.pdf [file NIHMS1794363-supplement-Supplementary_Information.pdf]

## **Supplementary Information for:**

### **Ancient plant-like terpene biosynthesis in corals**

Immo Burkhardt<sup>1</sup>, Tristan de Rond<sup>1§</sup>, Percival Yang-Ting Chen<sup>1,#</sup>, Bradley S. Moore<sup>1,2\*</sup>

<sup>1</sup>Scripps Institution of Oceanography, University of California San Diego; 9500 Gilman Dr., La Jolla, CA 92093, USA.

<sup>2</sup>Skaggs School of Pharmacy and Pharmaceutical Sciences, University of California San Diego; 9500 Gilman Dr., La Jolla, CA 92093, USA.

§Present address: School of Chemical Sciences, University of Auckland; Private Bag 92019, Auckland 1142, New Zealand.

#Present address: Morphic Therapeutics; 35 Gatehouse Drive, A2, Waltham, MA 02451, USA

\*Corresponding author. Email: bsmoore@ucsd.edu

## Contents

|                                                           |     |
|-----------------------------------------------------------|-----|
| <b>Supplementary Tables</b> .....                         | 3   |
| <b>Supplementary Figures</b> .....                        | 14  |
| <b>Supplementary Note 1 – Structure elucidation</b> ..... | 36  |
| Diterpene product of HcTC-3 ( <b>2</b> ) .....            | 36  |
| Diterpene product of BaTC-2 ( <b>4</b> ) .....            | 37  |
| Diterpene product of ErTC-2 ( <b>6</b> ) .....            | 38  |
| Diterpene product of XsTC-1 ( <b>7</b> ).....             | 39  |
| Diterpene product of RmTC-1 ( <b>8</b> ).....             | 40  |
| Sesquiterpene product of HcTC-3 ( <b>9</b> ).....         | 41  |
| Sesquiterpene product of TmTC-2 ( <b>10</b> ).....        | 42  |
| Sesquiterpene product of CiTC-2 ( <b>11</b> ).....        | 43  |
| NMR spectra .....                                         | 44  |
| <b>Supplementary Note 2 – Sequences</b> .....             | 92  |
| Capnella imbricata mutS sequence.....                     | 92  |
| TC Sequences.....                                         | 92  |
| <b>Supplementary References</b> .....                     | 100 |

## Supplementary Tables

**Supplementary Table 1.** Uniprot accession numbers of TC sequences used for constructing the TC profile HMM.

|            |            |            |
|------------|------------|------------|
| A0A1L7U8F2 | A1C8C3     | A8NCM9     |
| A0A1L7VZE7 | A8NE23     | B2J4A4     |
| E4MYYO     | Q96WT2     | B5GRC8     |
| A0A0H5BN61 | Q9UR08     | I1S104     |
| A0A0H5BN57 | Q03471     | M1V9Q0     |
| D9XDR8     | B6H063     | M1VDX3     |
| KOK750     | Q82RR7     | A0A0B4EB91 |
| B5GS26     | M4VQY9     | A0A1B8A5N9 |
| C7PLV2     | E4N7E5     | A1DN30     |
| A0A0L6WFN4 | A0A0B4G3Q7 | A0A2Z6AQX7 |
| A0A2N3Y098 | A0A0B4IF96 | A0A348DU52 |
| A0A0L6WRL8 | E9E766     | E3VWJ0     |
| E8W6C7     | A0A0B4GN88 | Q82IY4     |
| B1W019     | A0A0B4FWC3 | Q55012     |
| E4N7E5     | A0A1B4XBG5 | B2DBF0     |
| S0DX56     | P9WEV7     | A0A2L0VXR0 |
| A9FZ87     | C9K1X5     | Q6WP50     |
| A8NU13     | Q9UVY5     | P0DL13     |
| A7NH01     | S0EA85     | B5H7H3     |
| A0A0L6WB32 | O13284     | A0A2Z6AQX6 |
| B5GW45     | Q5KSN4     | B5HDJ6     |
| D5SL78     | Q9K499     | P0DPK6     |
| B5GMG2     | A0A169T193 | A0A5S9I252 |
| A4FG19     | A0A1Y1C7Q5 | Q9AJE3     |
| A3KI17     | A0A0P0ZEM1 | O34707     |
| Q9F1Y6     | A0A0P0ZD79 | P13513     |
| D2B747     | A0A1U9WTL2 | I2N045     |
| D9XD61     | C9K2Q3     | A2PZA5     |
| A0A1L9UKS1 | A2PZA5     | A0A1Q5UFC3 |
| E9F8R9     | Q9X839     |            |

**Supplementary Table 2.** Public genome assemblies used for genome mining.

| <u>Coral species</u>              | <u>Number of TC genes (number including paralogs)</u> | <u>Acc no.</u>                                                                                              | <u>reference</u> |
|-----------------------------------|-------------------------------------------------------|-------------------------------------------------------------------------------------------------------------|------------------|
| <i>Dendronephthya gigantea</i>    | 2 (2)                                                 | NCBI acc no.: GCA_004324835.1                                                                               | <sup>1</sup>     |
| <i>Renilla muelleri</i>           | 1 (1)                                                 | Downloaded from:<br><a href="http://rmue.reefgenomics.org/">http://rmue.reefgenomics.org/</a>               | <sup>2</sup>     |
| <i>Renilla reniformis</i>         | 1 (1)                                                 | NCBI acc no.: GCA_900177555.1                                                                               | <sup>3</sup>     |
| <i>Xenia</i> sp.                  | 1 (2)                                                 | Downloaded from:<br><a href="https://cmo.carnegiescience.edu/data">https://cmo.carnegiescience.edu/data</a> | <sup>4</sup>     |
| <i>Trachythela</i> sp.<br>YZ-2020 | 6 (12)                                                | NCBI acc no.: GCA_016169945.1                                                                               | <sup>5</sup>     |
| <i>Paramuricea clavata</i>        | 4 (8)                                                 | Downloaded from:<br><a href="https://denovo.cnag.cat/pclavata">https://denovo.cnag.cat/pclavata</a>         | <sup>6</sup>     |

**Supplementary Table 3.** Public data used for transcriptome mining.

| <u>Species</u>                     | <u>Number of TC</u> | <u>Assembly info</u>                                                                                   | <u>SRA dataset</u>              | <u>reference</u> | <u>Terpenoids reported</u>  |
|------------------------------------|---------------------|--------------------------------------------------------------------------------------------------------|---------------------------------|------------------|-----------------------------|
| <i>Alcyonium palmatum</i>          | 0                   | Assembled in this work                                                                                 | SRR3407216                      | 7                | Yes <sup>8</sup>            |
| <i>Acanthogorgia aspera</i>        | 1 (1 partial)       | NCBI acc no.: GEXC01                                                                                   | SRR3303654                      | -                | From genus <sup>9</sup>     |
| <i>Briareum asbestinum</i>         | 2                   | NCBI acc no.: GHBD02                                                                                   | SRR7895344                      | 10               | Yes <sup>11,12</sup>        |
| <i>Callogorgia delta</i>           | 3                   | Assembled in this work                                                                                 | SRR13925246                     | 13               | No                          |
| <i>Clavularia sp.</i>              | 1 (1 partial)       | NCBI acc no.: GHAW01                                                                                   | SRR8102779, SRR8102780          | 14               | From genus <sup>15,16</sup> |
| <i>Corallium rubrum</i>            | 1                   | Downloaded from: <a href="https://doi.org/10.5061/dryad.31f77">https://doi.org/10.5061/dryad.31f77</a> | SRR1552945                      | 17               | From genus <sup>18</sup>    |
| <i>Dendronephthya gigantea</i>     | 2 (1 partial)       | Assembled in this work                                                                                 | SRR8293935                      | 1                | From genus <sup>19,20</sup> |
| <i>Eleutherobia rubra</i>          | 2                   | NCBI acc no.: GHFI01                                                                                   | SRR8486076                      | 21               | From genus <sup>22</sup>    |
| <i>Eunicea calyculata</i>          | 1                   | Assembled in this work                                                                                 | SRR6039601                      | 23               | Yes <sup>24</sup>           |
| <i>Eunicea flexuosa</i>            | 1                   | Assembled in this work                                                                                 | SRR12876635                     | -                | From genus <sup>24</sup>    |
| <i>Eunicella cavolinii</i>         | 1 (1 partial)       | Assembled in this work                                                                                 | SRR1324943                      | 25               | Yes <sup>26</sup>           |
| <i>Gorgonia ventalina</i>          | 3                   | Assembled in this work                                                                                 | SRR935083                       | -                | Yes <sup>27</sup>           |
| <i>Heliopora coerulea</i>          | 3                   | NCBI acc no.: IABP01                                                                                   | DRR072217, DRR072218, DRR072219 | 28               | Yes <sup>29</sup>           |
| <i>Paramuricea biscaya</i>         | 2                   | Assembled in this work                                                                                 | SRR7521178                      | 30               | From genus <sup>31</sup>    |
| <i>Paramuricea clavata</i>         | 3 (1 partial)       | Assembled in this work                                                                                 | ERR3664728                      | 6                | From genus <sup>31</sup>    |
| <i>Paramuricea type B3</i>         | 1 (1 partial)       | Assembled in this work                                                                                 | SRR13925244                     | 13               | From genus <sup>31</sup>    |
| <i>Pinnigorgia flava</i>           | 0                   | Assembled in this work                                                                                 | ERX4193767                      | 32               | no                          |
| <i>Renilla koellikeri</i>          | 1 (1 partial)       | Assembled in this work                                                                                 | SRR7495167                      | -                | From genus <sup>33</sup>    |
| <i>Renilla reniformis</i>          | 0                   | Assembled in this work                                                                                 | ERR2808321                      | 2                | Yes <sup>33</sup>           |
| <i>Sarcophyton trocheliophorum</i> | 1                   | Assembled in this work                                                                                 | SRR12573946                     | -                | Yes <sup>34</sup>           |
| <i>Sinularia cruciata</i>          | 1 (1 partial)       | Assembled in this work                                                                                 | ERR3026434                      | 35               | From genus <sup>36</sup>    |
| <i>Tubipora musica</i>             | 2                   | Assembled in this work                                                                                 | ERR3026435                      | 35               | Yes <sup>37</sup>           |
| <i>Xenia sp.</i>                   | 1                   | Assembled in this work                                                                                 | SRR9278441                      | 4                | From genus <sup>38</sup>    |

**Supplementary Table 4.** Details for TC coding contigs from octocoral genomes.

| scaffold        | Organism and reference          | length (kbp) | coded TC | GC content (%) | coverage (avg. Reads per base) | Dataset used for transcript mapping | Dataset used for long read mapping |
|-----------------|---------------------------------|--------------|----------|----------------|--------------------------------|-------------------------------------|------------------------------------|
| NW_021163036    | <i>D. gigantea</i> <sup>1</sup> | 2263         | DgTC-1   | 38             | 90 (pacbio)                    | SRR8293935                          | SRR8293699                         |
| NW_021163042    | <i>D. gigantea</i> <sup>1</sup> | 2228         | DgTC-2   | 37             | 100 (pacbio)                   | SRR8293935                          | SRR8293699                         |
| HiC_scaffold_25 | <i>Xenia sp.</i> <sup>4</sup>   | 4749         | XsTC-1   | 35             | 88 (ONP)                       | SRR9278441                          | SRR9278438                         |

**Supplementary Table 5.** Genetic context of XsTC-1 on contig HiC\_scaffold\_25.

| Sequence      | GC% | # exons | Region (bp)       | Best scoring BLAST hit: | Sequence name                           | organism                                | E-value              | NCBI accession no. |
|---------------|-----|---------|-------------------|-------------------------|-----------------------------------------|-----------------------------------------|----------------------|--------------------|
| XsTC-1<br>-1  | 39  | 8       | 402750-<br>397351 |                         | uncharacterized protein<br>LOC122962660 | <i>Acropora millepora</i>               | 1x10 <sup>-128</sup> | XP_044181808.1     |
| <b>XsTC-1</b> | 42  | 1       | 421582-<br>420354 |                         | terpene synthase family protein         | <i>Streptosporangium nondiastaticum</i> | 0.1                  | WP_106680131.1     |
| XsTC-1<br>+1  | 38  | 1       | 426242-<br>425778 |                         | hypothetical protein<br>KOW79           | <i>Hemibagrus wyckioides</i>            | 0.076                | KAG7326961.1       |
| XsTC-1<br>+2  | 40  | 1       | 426516-<br>427094 |                         | no hit                                  |                                         |                      |                    |
| XsTC-1<br>+3  | 53  | 5       | 436341-<br>433328 |                         | no hit                                  |                                         |                      |                    |
| XsTC-1<br>+4  | 50  | 5       | 442821-<br>440118 |                         | microspherule protein<br>1-like         | <i>Plakobranthus ocellatus</i>          | 8x10 <sup>-31</sup>  | GFN97869.1         |
| XsTC-1<br>+5  | 39  | 23      | 445833-<br>486627 |                         | transmembrane protein<br>87A-like       | <i>Actinia tenebrosa</i>                | 0.0                  | XP_031573117.1     |

**Supplementary Table 6.** Genetic context of DgTC-1 on contig NW\_021163036.

| Sequence      | GC% | # exons | Region (bp)     | Best scoring BLAST hit: | Sequence name                         | organism                            | E-value              | NCBI accession no. |
|---------------|-----|---------|-----------------|-------------------------|---------------------------------------|-------------------------------------|----------------------|--------------------|
| -3            | 47  | 15      | 1163131-1171572 |                         | rho GTPase-activating protein 39-like | <i>Acropora millepora</i>           | 5x10 <sup>-154</sup> | XP_029180732.2     |
| -2            | 43  | 10      | 1178909-1174089 |                         | ubiquitin thioesterase otulin-like    | <i>Zootermopsis nevadensis</i>      | 3x10 <sup>-37</sup>  | XP_021939107.1     |
| -1            | 45  | 1       | 1180563-1179595 |                         | retinol dehydrogenase 12-like         | <i>Crassostrea gigas</i>            | 5x10 <sup>-111</sup> | XP_011420247.2     |
| <b>DgTC-1</b> | 46  | 1       | 1181590-1182822 |                         | HEAT repeat domain-containing protein | <i>Cand. Lokiarchaeota archaeon</i> | 0.57                 | NMC08674.1         |
| +1            | 46  | 14      | 1191885-1199119 |                         | suppressor of hairless protein        | <i>Saccoglossus kowalevskii</i>     | 0.0                  | NP_001158483.1     |
| +2            | 46  | 16      | 1201421-1221069 |                         | ABC transporter G family member 24    | <i>Nematostella vectensis</i>       | 0.0                  | XP_001642016.2     |



**Supplementary Table 7.** Genetic context of DgTC-2 on contig NW\_021163042.

| Sequence      | GC% | # exons | Region (bp)     | Best scoring BLAST hit: | Sequence name                                 | organism                          | E-value              | NCBI accession no. |
|---------------|-----|---------|-----------------|-------------------------|-----------------------------------------------|-----------------------------------|----------------------|--------------------|
| -2            | 41  | 10      | 1129642-1131952 |                         | protein-glutamine gamma-glutamyltransferase K | <i>Phallusia mammillata</i>       | 7x10 <sup>-173</sup> | CAB3266928.1       |
| -1            | 42  | 3       | 1144401-1150450 |                         | uncharacterized protein LOC110068857          | <i>Orbicella faveolata</i>        | 1x10 <sup>-18</sup>  | XP_020631939.1     |
| <b>DgTC-2</b> | 39  | 1       | 1154905-1153709 |                         | nucleotidyltransferase family protein         | <i>Oscillospiraceae bacterium</i> | 8.9                  | MBR3419154.1       |
| +1            | 41  | 6       | 1156399-1158527 |                         | 15-hydroxyprostaglandin dehydrogenase         | <i>Cyprinodon variegatus</i>      | 4x10 <sup>-51</sup>  | XP_015226913.1     |
| +2            | 37  | 6       | 1164817-1167808 |                         | peroxisomal biogenesis factor 19-like         | <i>Acropora millepora</i>         | 1x10 <sup>-56</sup>  | XP_029188873.2     |
| +3            | 37  | 1       | 1169969-1171558 |                         | zinc finger protein 271-like                  | <i>Acyrtosiphon pisum</i>         | 5x10 <sup>-108</sup> | XP_008180596.1     |
| +4            | 39  | 9       | 1172532-1177997 |                         | proton-coupled amino acid transporter 1-like  | <i>Orbicella faveolata</i>        | 6x10 <sup>-110</sup> | XP_031553692.1     |

**Supplementary Table 8.** PISA server results.

| <b>Enzyme</b>                  | <b><math>\Delta^{\ddagger}G</math> (kcal/mol)</b> | <b>Interface (<math>\text{\AA}^2</math>)</b> | <b>State in solution</b> | <b>reference</b> |
|--------------------------------|---------------------------------------------------|----------------------------------------------|--------------------------|------------------|
| ErTC-2 (7s5l)                  | -6.5                                              | 597                                          |                          | This work        |
| epi-isozizaene synthase (4lz0) | -2.2                                              | 485                                          | monomeric                | 39               |
| 2-MIB synthase (4la6)          | -37.2                                             | 2549                                         | parallel homodimeric     | 40               |
| trichodiene synthase (2q9z)    | -40.9                                             | 2606                                         | antiparallel homodimeric | 41               |

**Supplementary Table 9.** RMSDs of ErTC2 with microbial (red) plant (green) and IDS (black) structures.

| RMSD<br>(Å) <sup>a</sup> | 4lz0<br>EIZS | 4okm  | 4kux  | 5eau  | 3p5r<br>TXDS | 1rqj  | 4jzb  | 5ja0<br>FPPS |
|--------------------------|--------------|-------|-------|-------|--------------|-------|-------|--------------|
| ErTC2                    | 4.190        | 4.630 | 4.707 | 4.221 | 5.011        | 9.723 | 7.665 | 16.417       |

**Supplementary Table 10.** Accession numbers for non-coral sequences used for phylogenetic analysis.

|              |              |              |              |
|--------------|--------------|--------------|--------------|
| E2E2N7       | WP_014153723 | XP_001836356 | KAE9533555   |
| B6SCF5       | B1W019       | EIM83755     | AAX78434     |
| I6RAQ6       | XP_023427124 | EIM91001     | XP_029182012 |
| J7LQ09       | WP_012241161 | EIM88705     | XP_028399803 |
| Q5SBP3       | KAG5727529   | EIM82223     | P14324       |
| P59287       | KAG5733850   | EIM91236     | P08836       |
| POCJ43       | XP_001836356 | P0DL13       | APB88773     |
| O48935       | WP_012119179 | BBD74517     | APB88774     |
| Q4KSH9       | WP_003956090 | XP_645958    | APB88775     |
| Q84UU4       | WP_003963519 | XP_645125    | APB88776     |
| B3TPQ6       | WP_003952918 | XP_644874    | APB88777     |
| Q41594       | WP_011874125 | XP_642676    | APB88778     |
| B5A434       | WP_053126184 | XP_640697    | APB88779     |
| Q9FXY7       | WP_011031839 | XP_638489    | APB88780     |
| H8ZM70       | D2B747       | XP_642261    | AVZ23977     |
| C7E5V7       | WP_003994861 | XP_629084    | AYD76069     |
| O24475       | XP_007824857 | XP_642260    | ALL35411     |
| Q6PWU2       | XP_001832925 | XP_002679043 | ALL35417     |
| A4FVP2       | Q9UR08       | XP_002682659 | ALL35420     |
| C5YHH7       | XP_038933630 | AXN72983     | ALL35414     |
| O49853       | XP_002557473 | AZO92733     |              |
| Q84LF0       | WP_010981512 | AZO92734     |              |
| J7LH11       | BAJ27126     | ASV63464     |              |
| B1B1U3       | KID95099     | ASV63466     |              |
| O81191       | A0A1B4XBG5   | ASV63465     |              |
| O64404       | 4OMG_A       | Q43315       |              |
| G1JUH1       | WP_011030119 | Q54BK1       |              |
| Q6Q3H2       | AQY56778     | Q9LIA0       |              |
| B9S9Z3       | KFG77771     | B2DBE9       |              |
| Q94G53       | EAU89322     | A0A2L0VXR5   |              |
| Q8GUE4       | WP_012410187 | P22939       |              |
| B9RXW0       | KAG8664989   | Q8WMY2       |              |
| I6QPS5       | XP_011319367 | P0AD57       |              |
| G5CV45       | M1VDX3       | J7FIX8       |              |
| B0FGA9       | WP_143632835 | A0A1B4XBK0   |              |
| E2E2P0       | WP_010984429 | A0A140JWS2   |              |
| O64961       | Q55012       | Q7XYS9       |              |
| Q29VN2       | XP_024552383 | O64905       |              |
| C7ASI9       | WP_005320742 | O24241       |              |
| XP_041688448 | QJQ03973     | P49351       |              |
| XP_031085895 | WP_005317515 | O53507       |              |
| WP_014133196 | WP_030261827 | Q3IPL1       |              |
| D9XDR8       | A0A5S9I252   | P48368       |              |
| WP_015102836 | P13513       | P54976       |              |
| WP_003954606 | WP_006348711 | P39464       |              |
| WP_012792334 | QGA30878     | P45204       |              |
| KNZ74377     | XP_001832573 | XP_001958742 |              |
| WP_010314578 | XP_001836556 | XP_022808076 |              |
| WP_020663213 | XP_001832925 | ALL35400     |              |

**Supplementary Table 11.** Data collection and model refinement statistics of coral terpene synthases.

|                                               |                                                            |                                                             |
|-----------------------------------------------|------------------------------------------------------------|-------------------------------------------------------------|
|                                               | Cd(II)-ErTC-2                                              | ErTC-2                                                      |
| PDB ID                                        | -                                                          | 7S5L                                                        |
| Beamline                                      | UCSD X-ray Crystallography Facility                        | SSRL 12-2                                                   |
| Wavelength (Å)                                | 1.54178                                                    | 0.97946                                                     |
| Space Group                                   | C2                                                         | C2                                                          |
| Cell dimensions (Å)                           | a = 82.75,<br>b = 99.70,<br>c = 46.48,<br>$\beta$ = 92.29° | a = 85.69,<br>b = 101.65,<br>c = 46.34,<br>$\beta$ = 90.60° |
| Resolution                                    | 33.98-2.57 (2.67-2.57)                                     | 40.0-1.58<br>(1.67-1.58)                                    |
| # unique reflections                          | 23522 (2453)                                               | 54425 (8769)                                                |
| Completeness (%)                              | 99.6 (96.8)                                                | 96.1 (94.1)                                                 |
| Redundancy                                    | 15.3 (8.8)                                                 | 3.9 (3.9)                                                   |
| $\langle I/\sigma I \rangle$                  | 20.8 (3.9)                                                 | 14.7 (2.6)                                                  |
| R <sub>sym</sub>                              | 0.073 (0.376)                                              | 0.046 (0.390)                                               |
| CC <sub>1/2</sub>                             | *                                                          | (0.90)                                                      |
|                                               |                                                            |                                                             |
| Resolution                                    |                                                            | 37.97-1.58                                                  |
| # unique reflections                          |                                                            | 52284                                                       |
| R <sub>work</sub> (%) / R <sub>free</sub> (%) |                                                            | 16.1/19.2                                                   |
| RMS bond length (Å)                           |                                                            | 0.005                                                       |
| RMS bond angles (°)                           |                                                            | 0.697                                                       |
| # of atoms                                    |                                                            |                                                             |
| Protein Atoms                                 |                                                            | 3152                                                        |
| Diphosphate                                   |                                                            | -                                                           |
| Ethylene glycol                               |                                                            | 12                                                          |
| Water molecules                               |                                                            | 188                                                         |
| Mg <sup>2+</sup>                              |                                                            | -                                                           |
| Cl <sup>-</sup>                               |                                                            | 1                                                           |
| Average B-factor (Å <sup>2</sup> )            |                                                            |                                                             |
| Protein Atoms                                 |                                                            | 30                                                          |
| Diphosphate                                   |                                                            | -                                                           |
| Ethylene glycol                               |                                                            | 38                                                          |
| Water molecules                               |                                                            | 39                                                          |
| Mg <sup>2+</sup>                              |                                                            | -                                                           |
| Cl <sup>-</sup>                               |                                                            | 28                                                          |
| Ramachandran plot                             |                                                            |                                                             |
| Favored (%)                                   |                                                            | 98.12                                                       |
| Allowed (%)                                   |                                                            | 1.88                                                        |
| Outliers (%)                                  |                                                            | 0.00                                                        |
| Rotamer outliers (%)                          |                                                            | 0.00                                                        |
| Residues modeled (1-393)                      |                                                            | 2-195, 201-381, 389-391                                     |

# Supplementary Figures

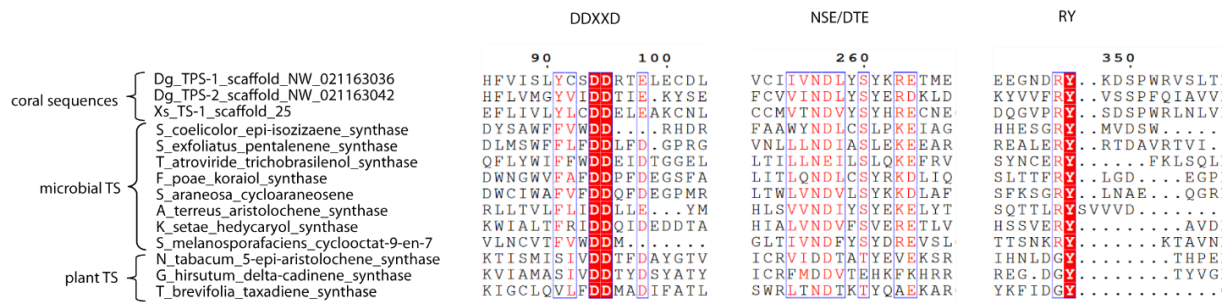

**Supplementary Fig. 1.** Regions from alignments with newly identified coral sequences with microbial and plant terpene synthase (TS) sequences that show the conserved motifs. Plant-like terpene synthases show more diversity in the NSD/DTE motif and do not have the RY motif.

MW  
kDa

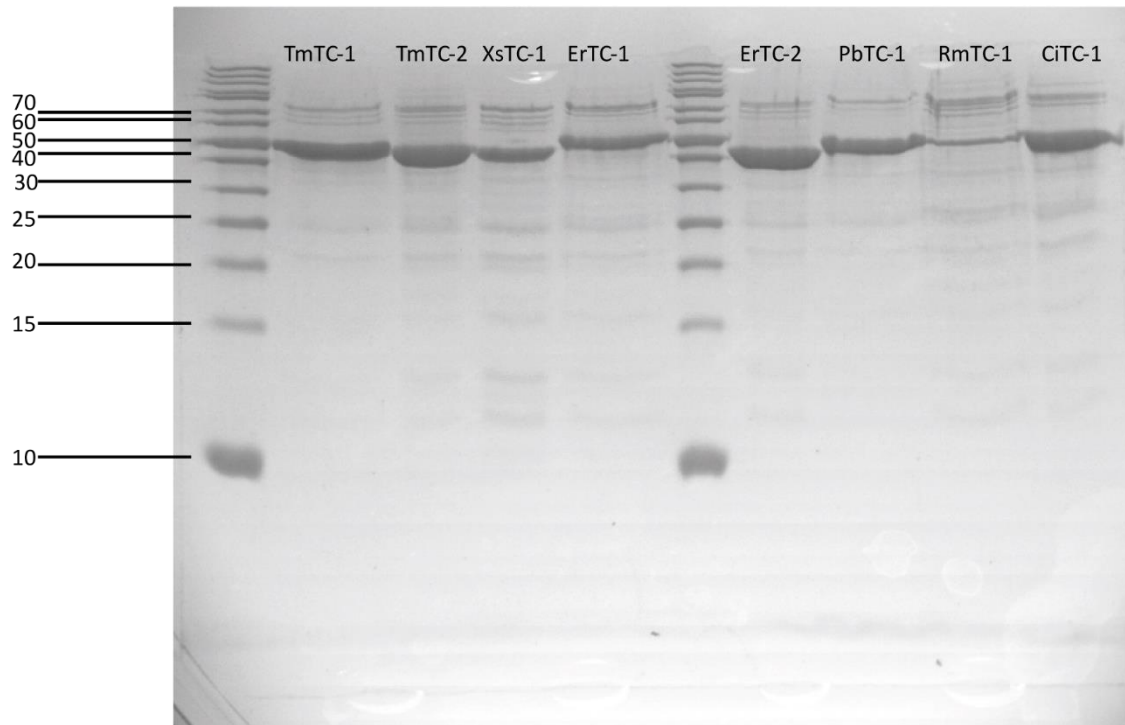

**Supplementary Fig. 2.** SDS PAGE analysis of recombinant TmTC-1, TmTC-2, XsTC-1, ErTC-1, ErTC-2, PbTC-1, RmTC-1, CiTC-1. The image shows representative bands after Ni-NTA purification. All expressions were carried out at least twice on different days. No attempts failed.

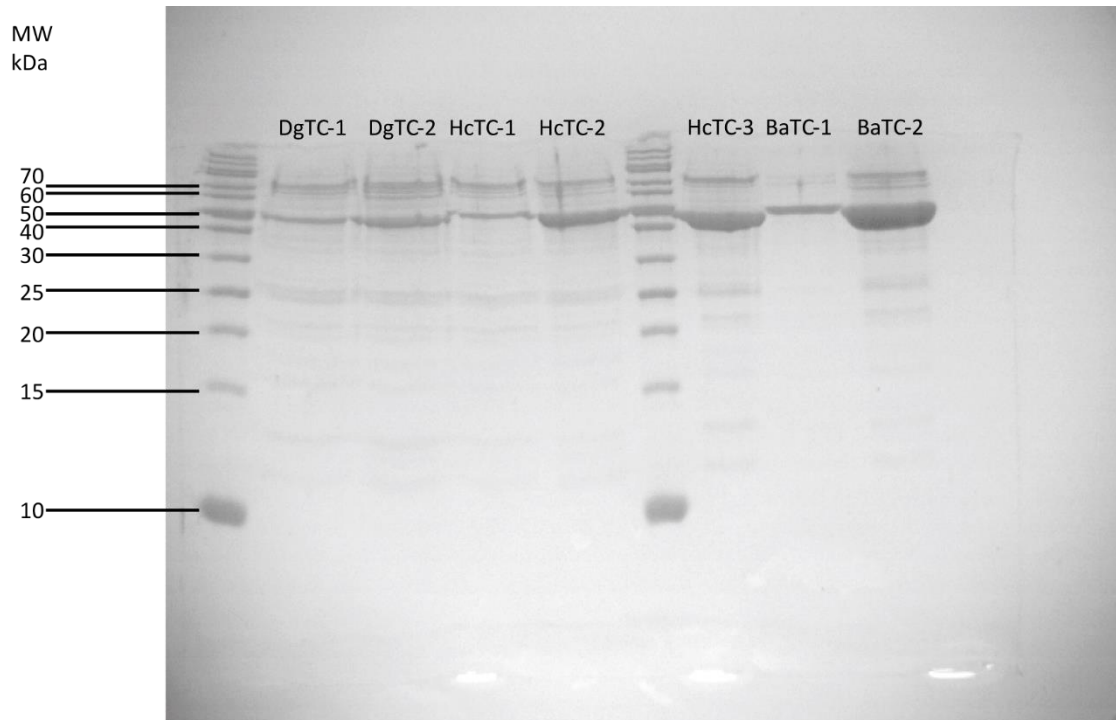

**Supplementary Fig. 3.** SDS PAGE analysis of recombinant DgTC-1, DgTC-2, HcTC-1, HcTC-2, HcTC-3, BaTC-1, BaTC-2. The image shows representative bands after Ni-NTA purification. All expressions were carried out at least twice on different days. No attempts failed.



**BaTC-1**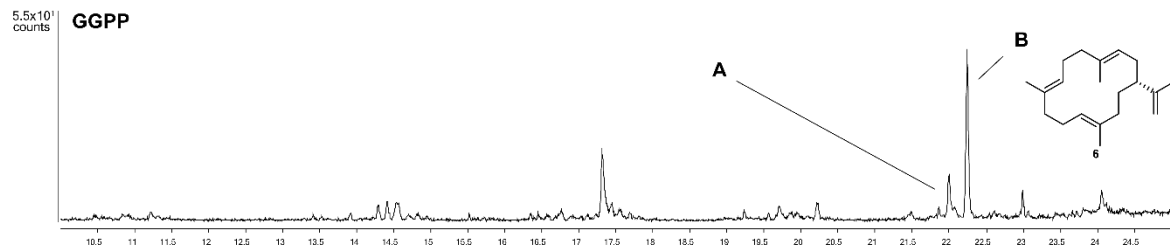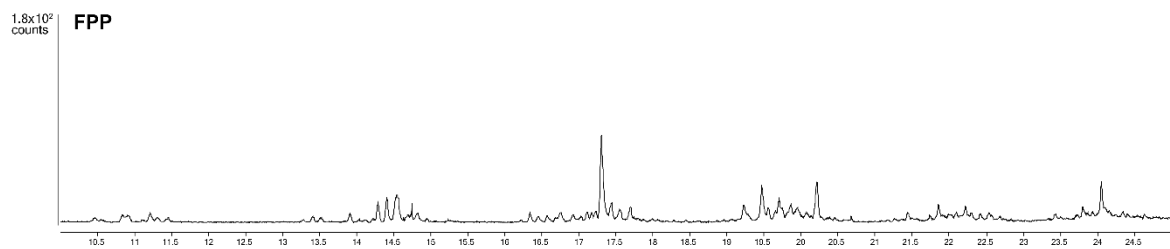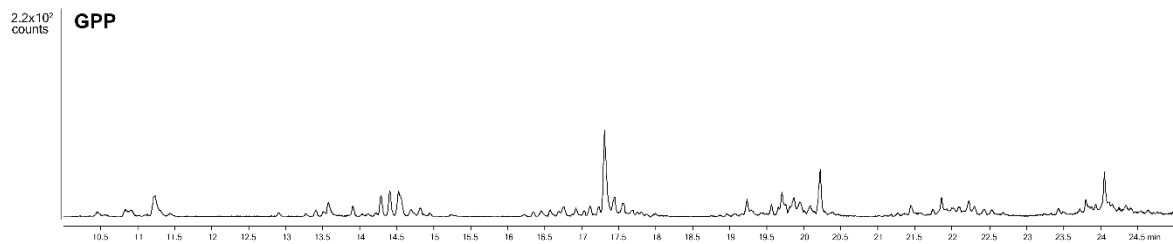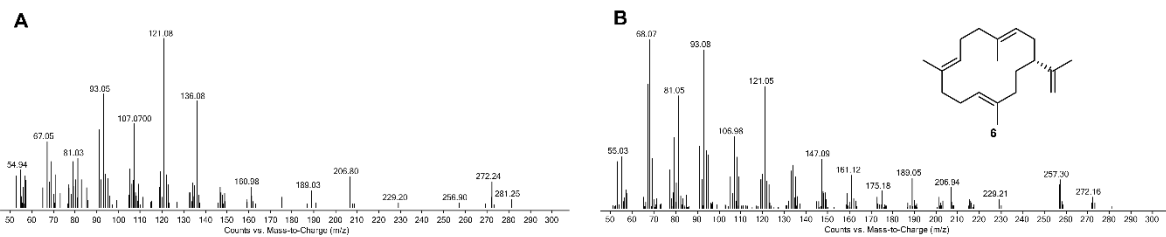

**Supplementary Fig. 4.** GCMS analysis of BaTC-1 with the substrates GGPP (top) FPP (middle) and GPP (bottom). Mass spectra for major peaks are shown. The absolute configuration of **6** produced by this enzyme was not determined.

## BaTC-2

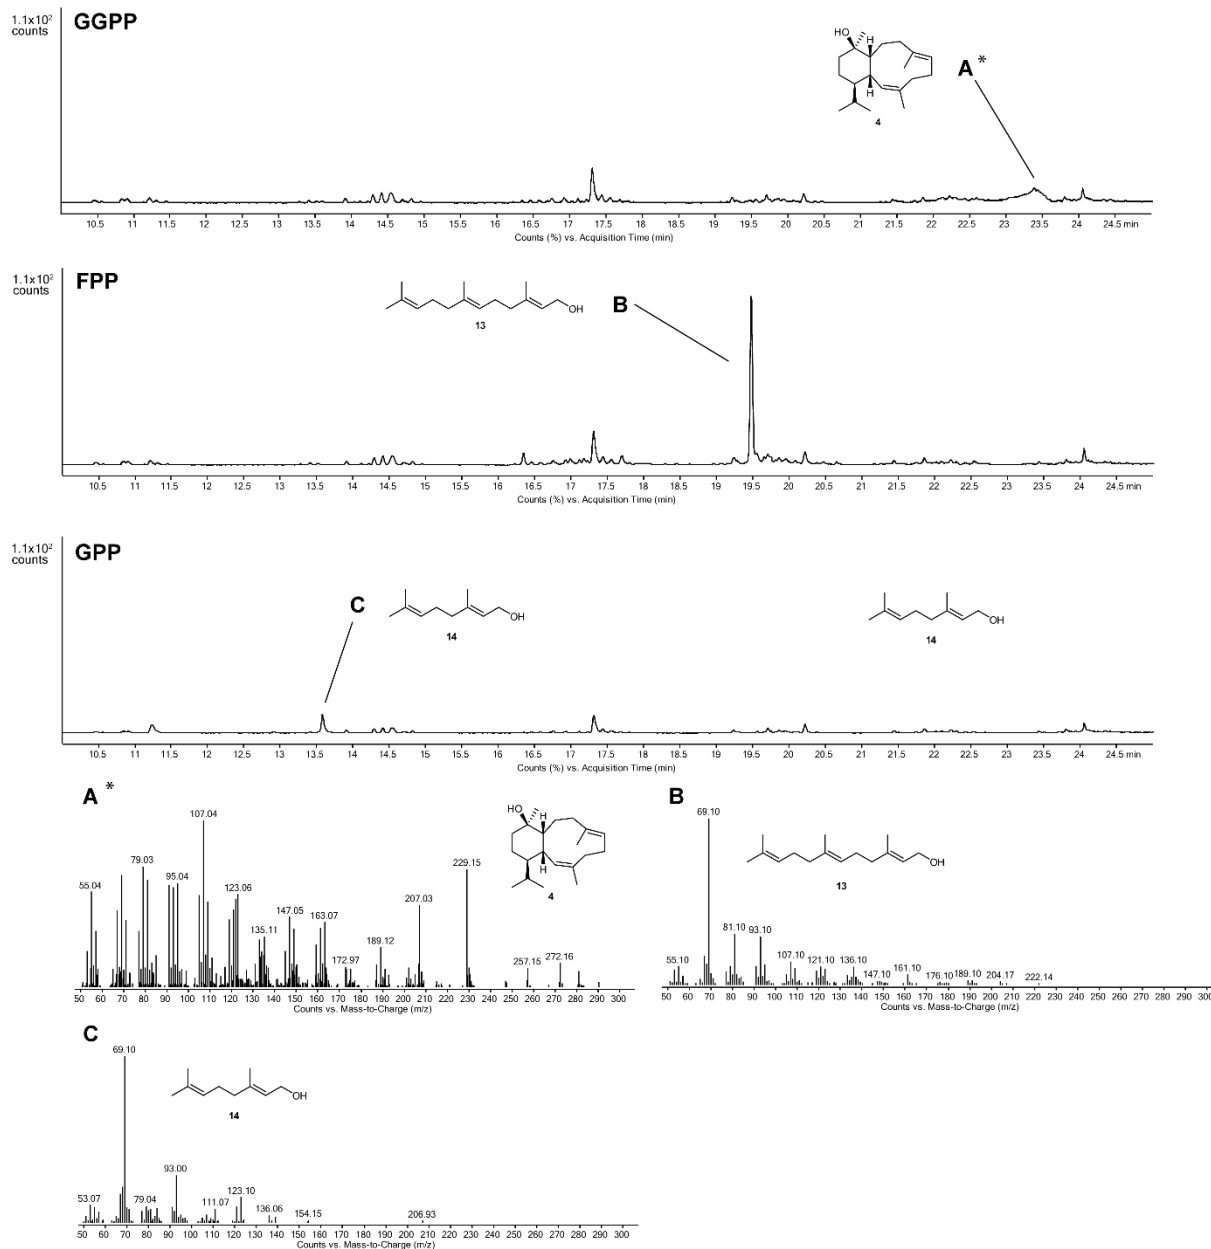

**Supplementary Fig. 5.** GCMS analysis of BaTC-2 with the substrates GGPP (top) FPP (middle) and GPP (bottom). Mass spectra for major peaks are shown.  
\*: Compound **4** rearranges/decomposes in the GC injector and elutes as multiple products as a broad peak. Mass spectrum A is averaged over the whole signal.

**CiTC-1**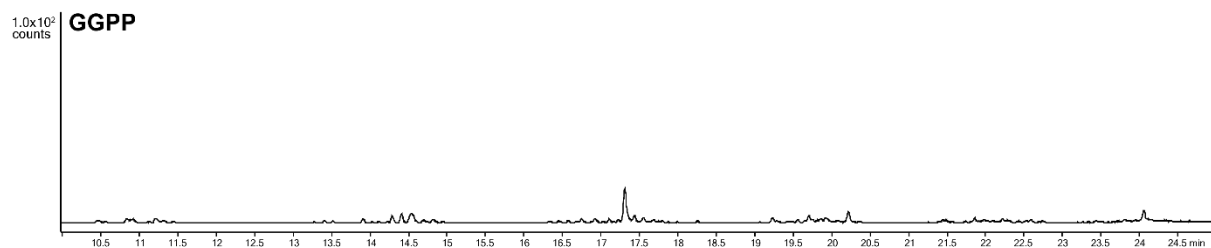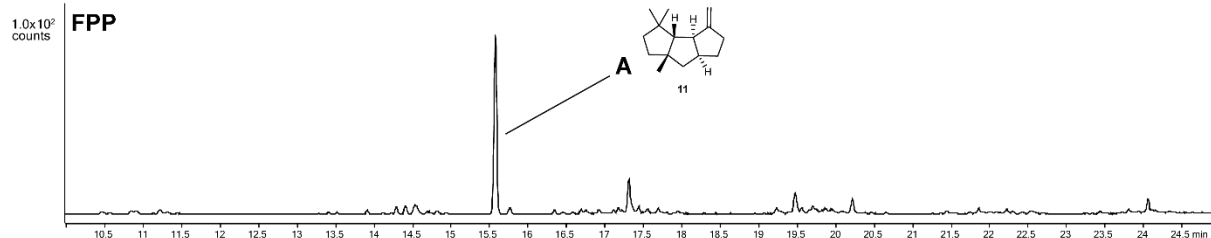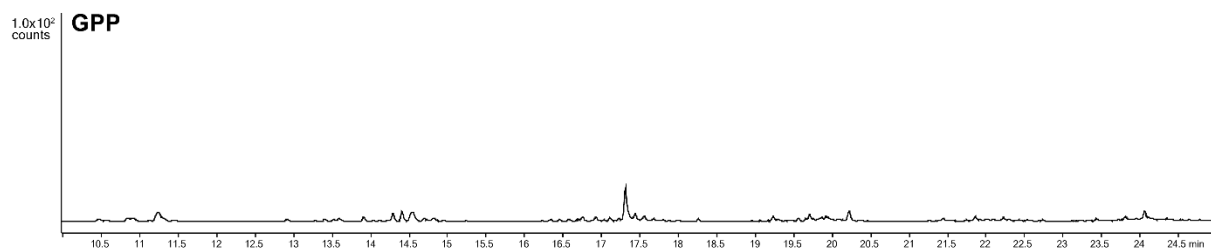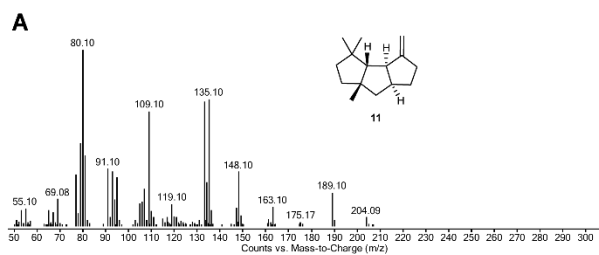

**Supplementary Fig. 6.** GCMS analysis of CiTC-1 with the substrates GGPP (top) FPP (middle) and GPP (bottom). Mass spectra for major peaks are shown.

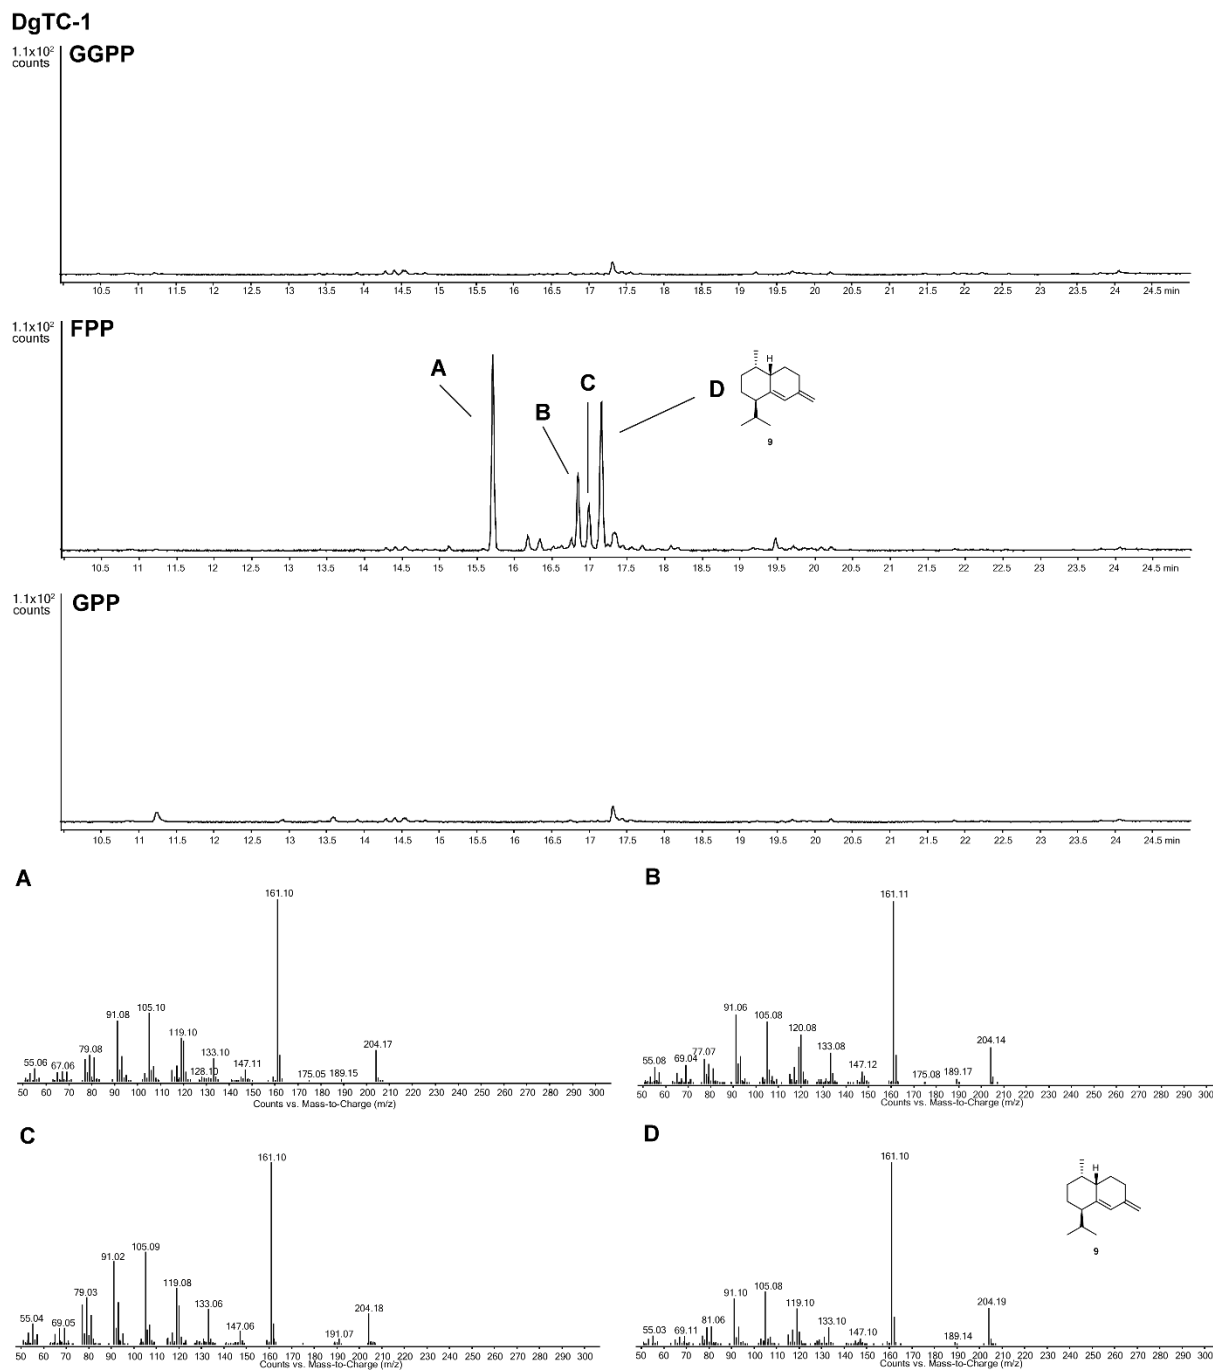

**Supplementary Fig. 7.** GCMS analysis of DgTC-1 with the substrates GGPP (top) FPP (middle) and GPP (bottom). Mass spectra for major peaks are shown. The absolute configuration of **9** produced by this enzyme was not determined.

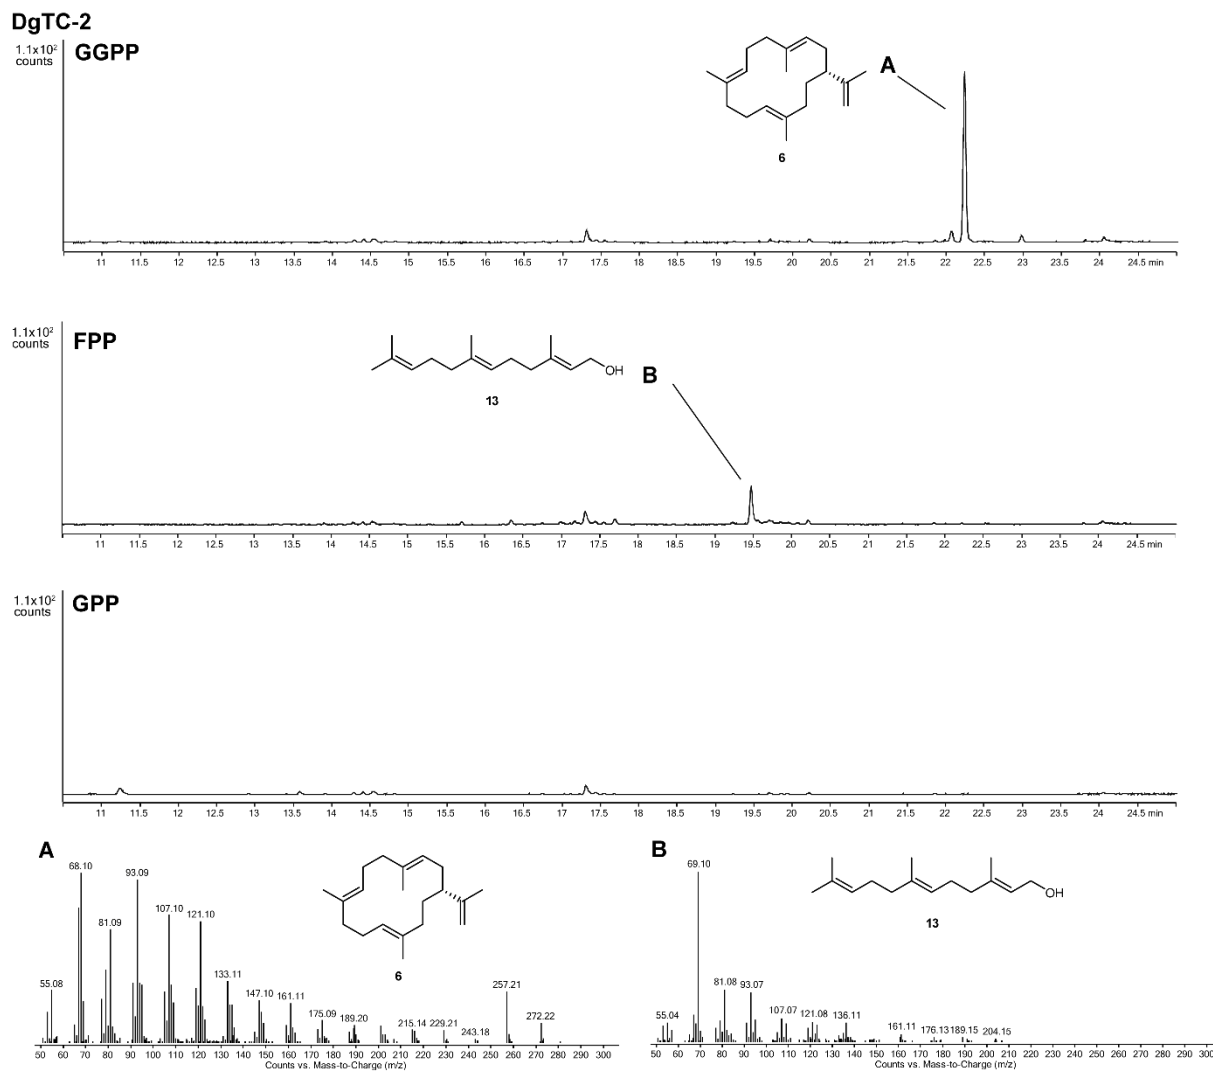

**Supplementary Fig. 8.** GCMS analysis of DgTC-2 with the substrates GGPP (top) FPP (middle) and GPP (bottom). Mass spectra for major peaks are shown. The absolute configuration of **6** produced by this enzyme was not determined.

### ErTC-1

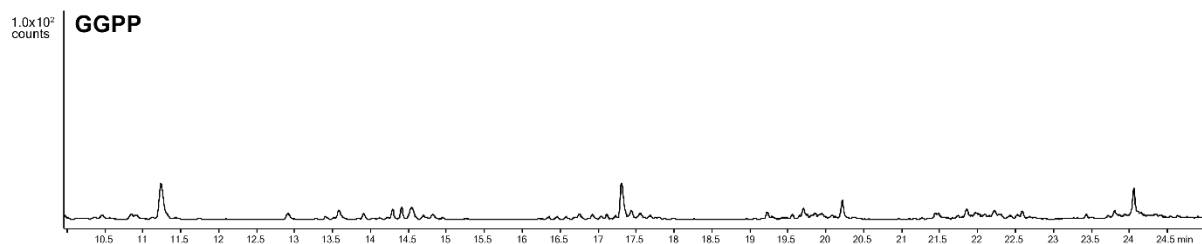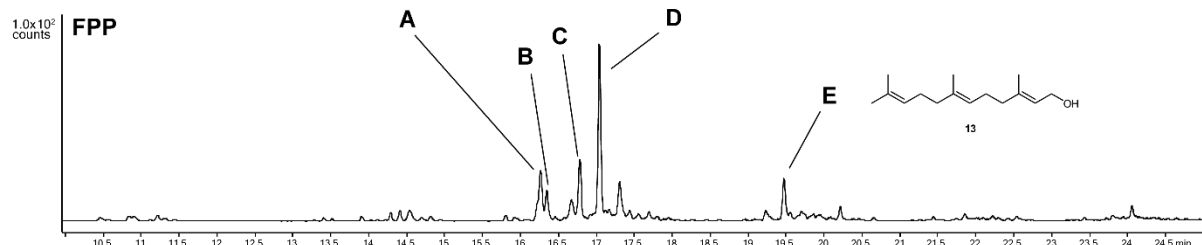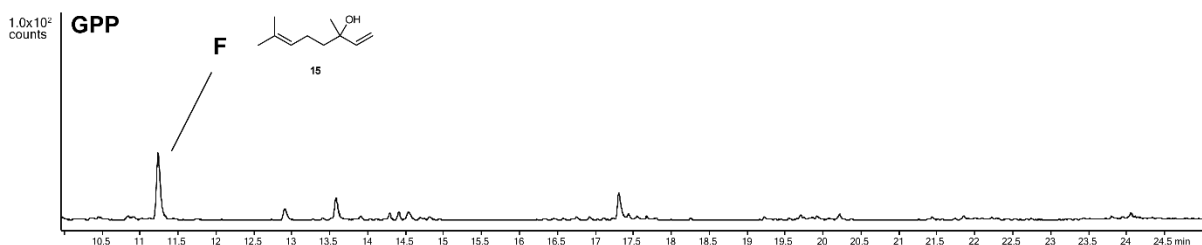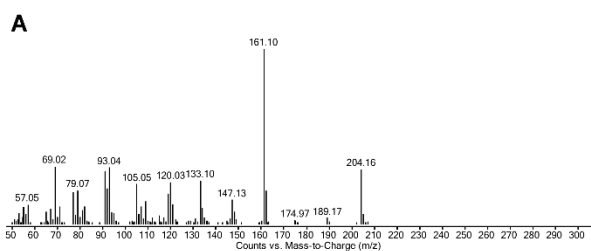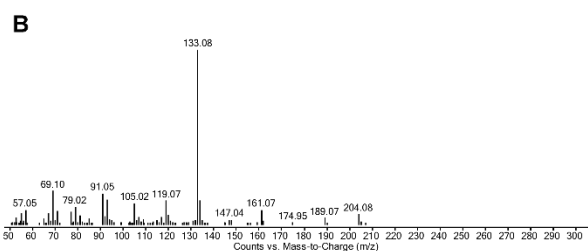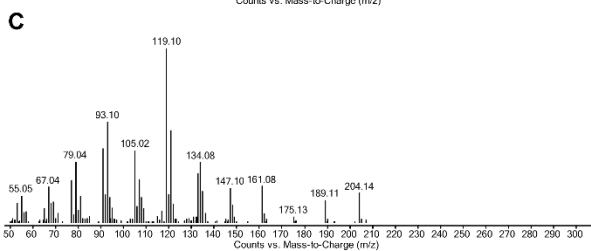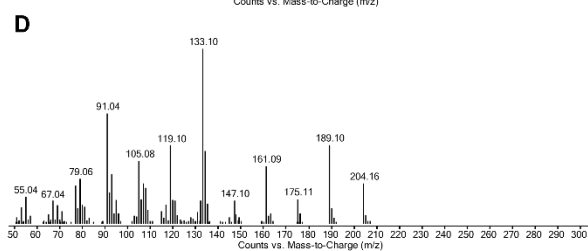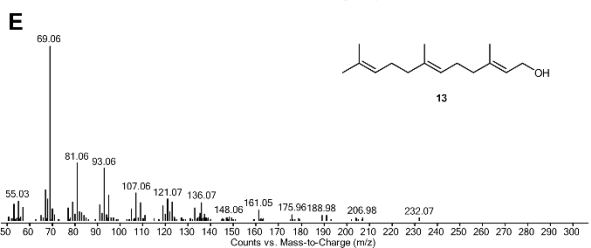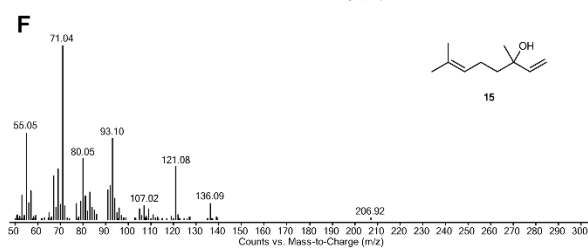

**Supplementary Fig. 9.** GCMS analysis of ErTC-1 with the substrates GGPP (top) FPP (middle) and GPP (bottom). Mass spectra for major peaks are shown.

**ErTC-2**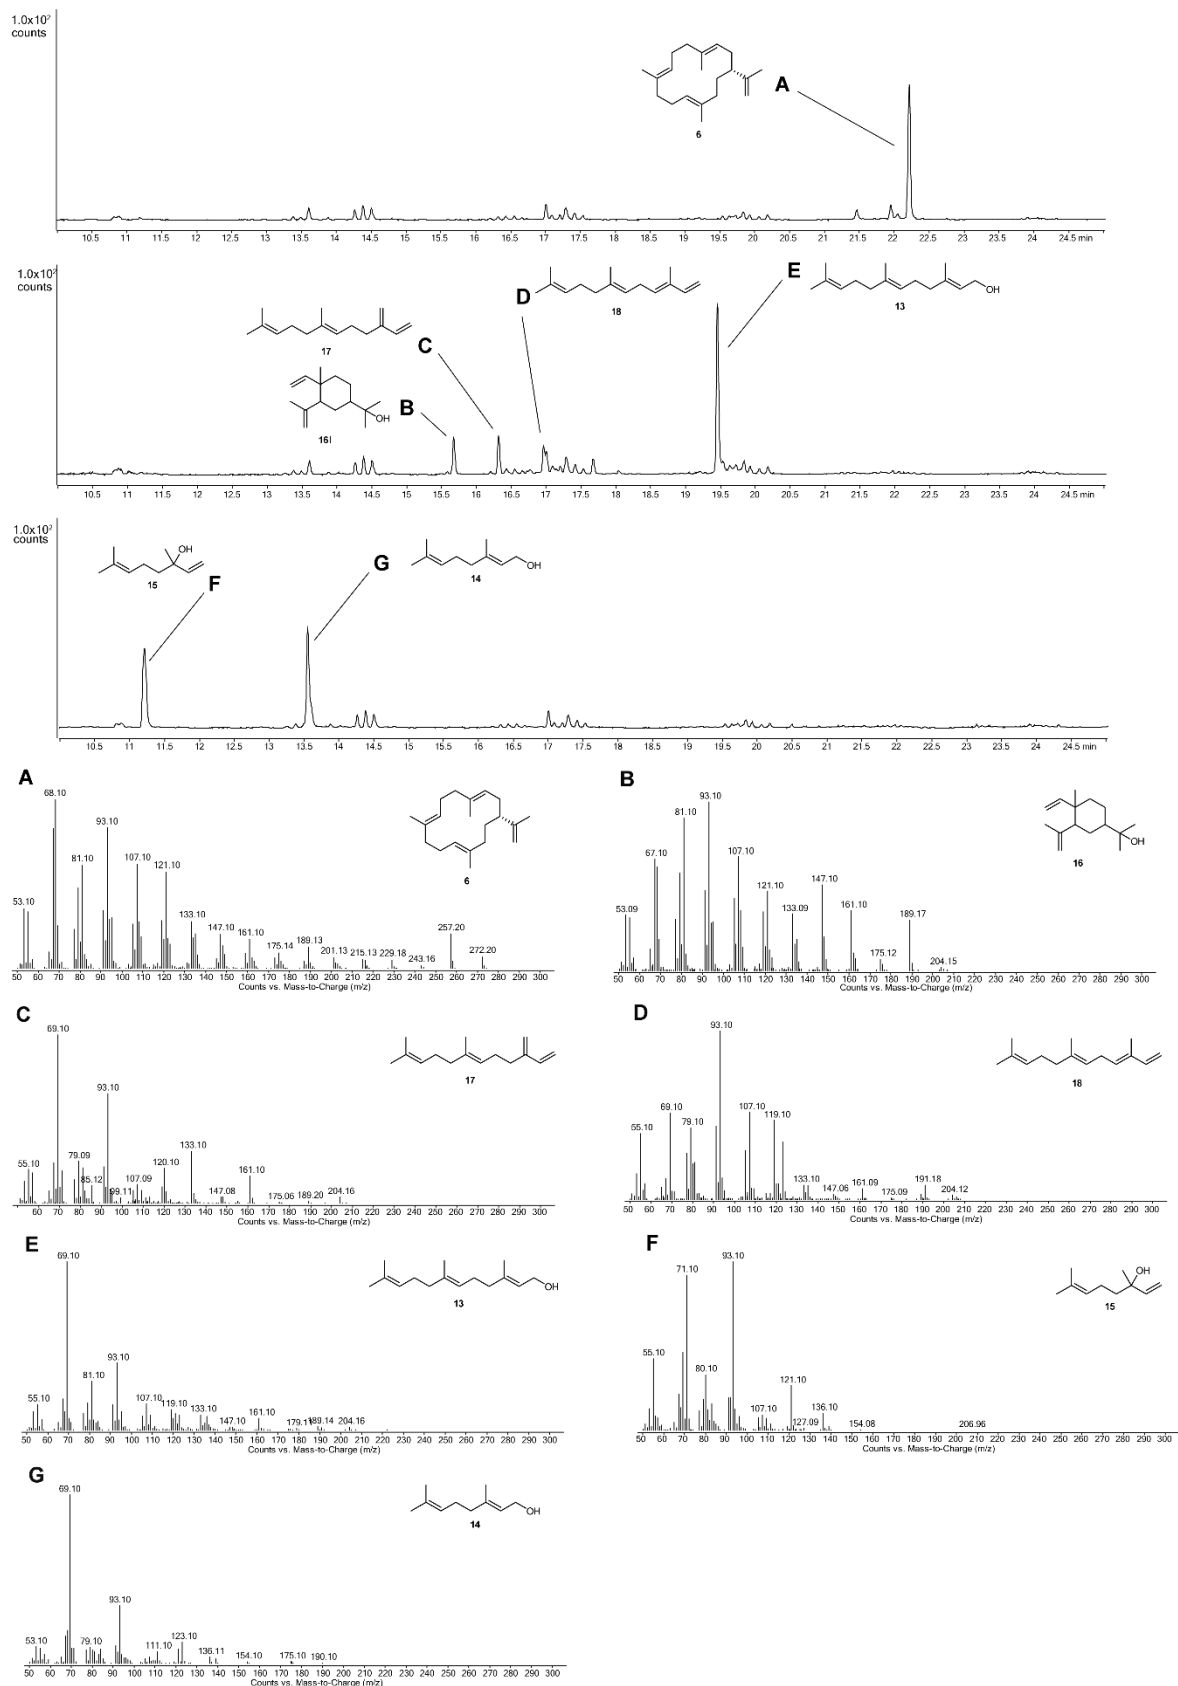

**Supplementary Fig. 10.** GCMS analysis of ErTC-2 with the substrates GGPP (top) FPP (middle) and GPP (bottom). Mass spectra for major peaks are shown.

### HcTC-1

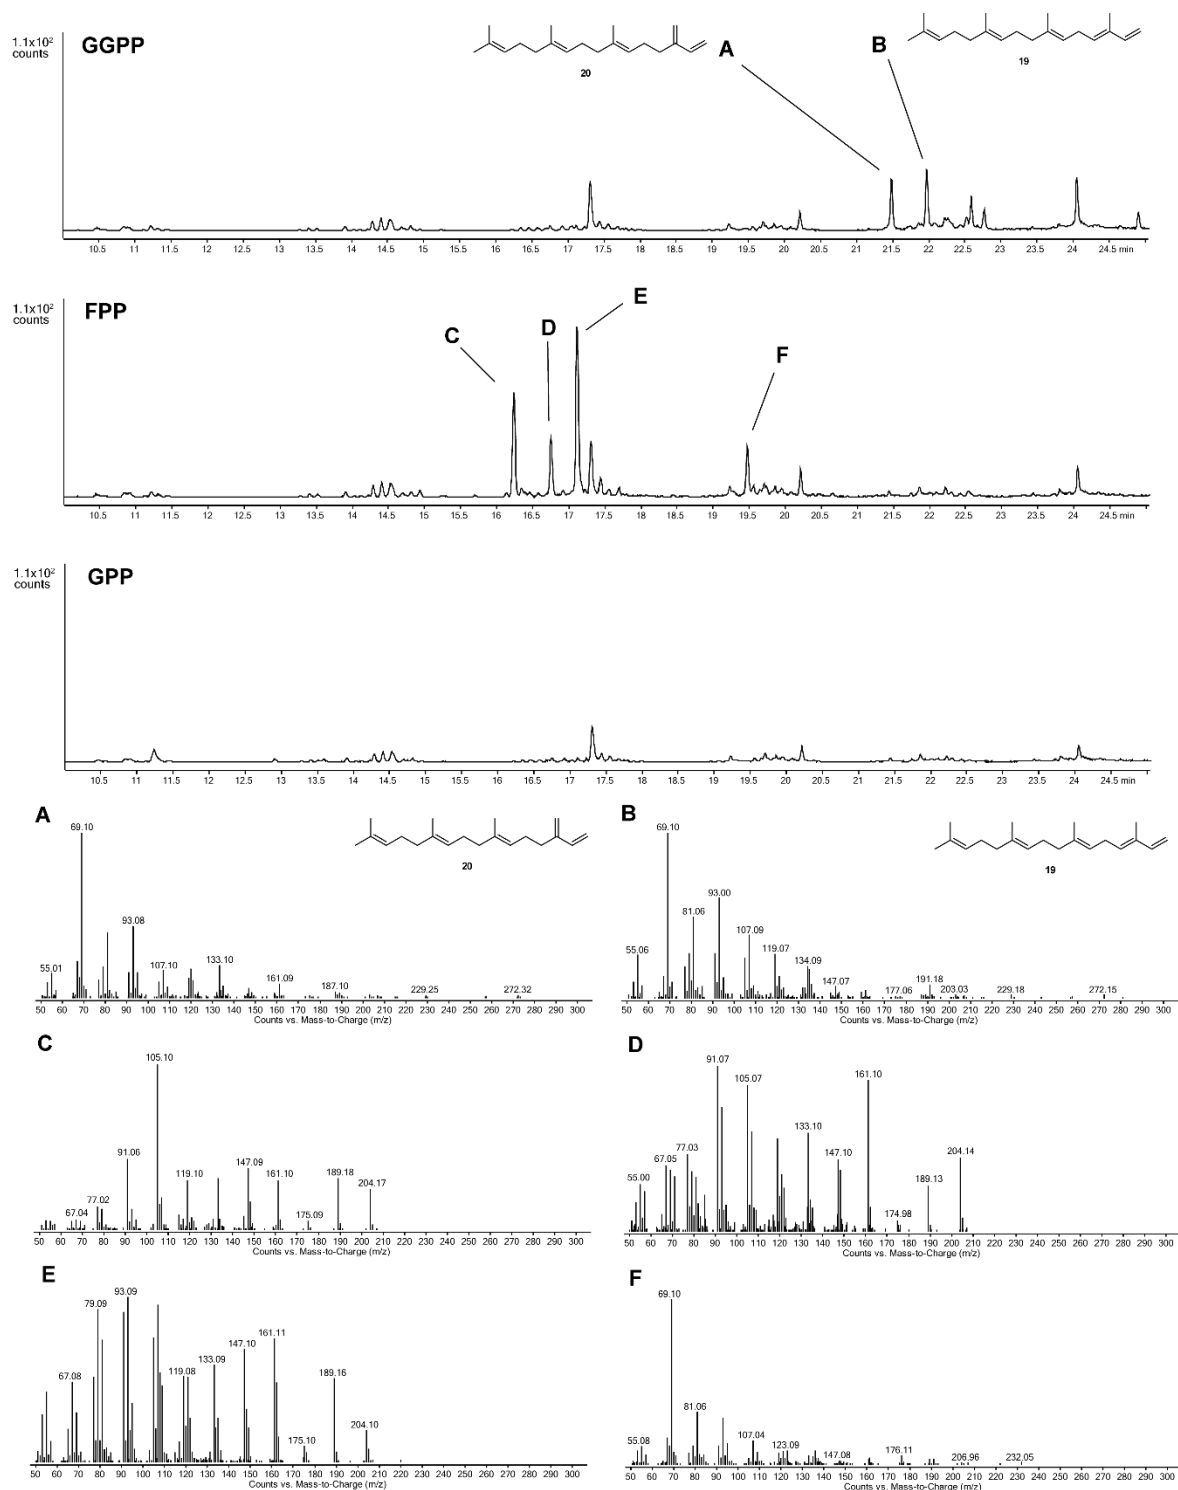

**Supplementary Fig. 11.** GCMS analysis of HcTC-1 with the substrates GGPP (top) FPP (middle) and GPP (bottom). Mass spectra for major peaks are shown.



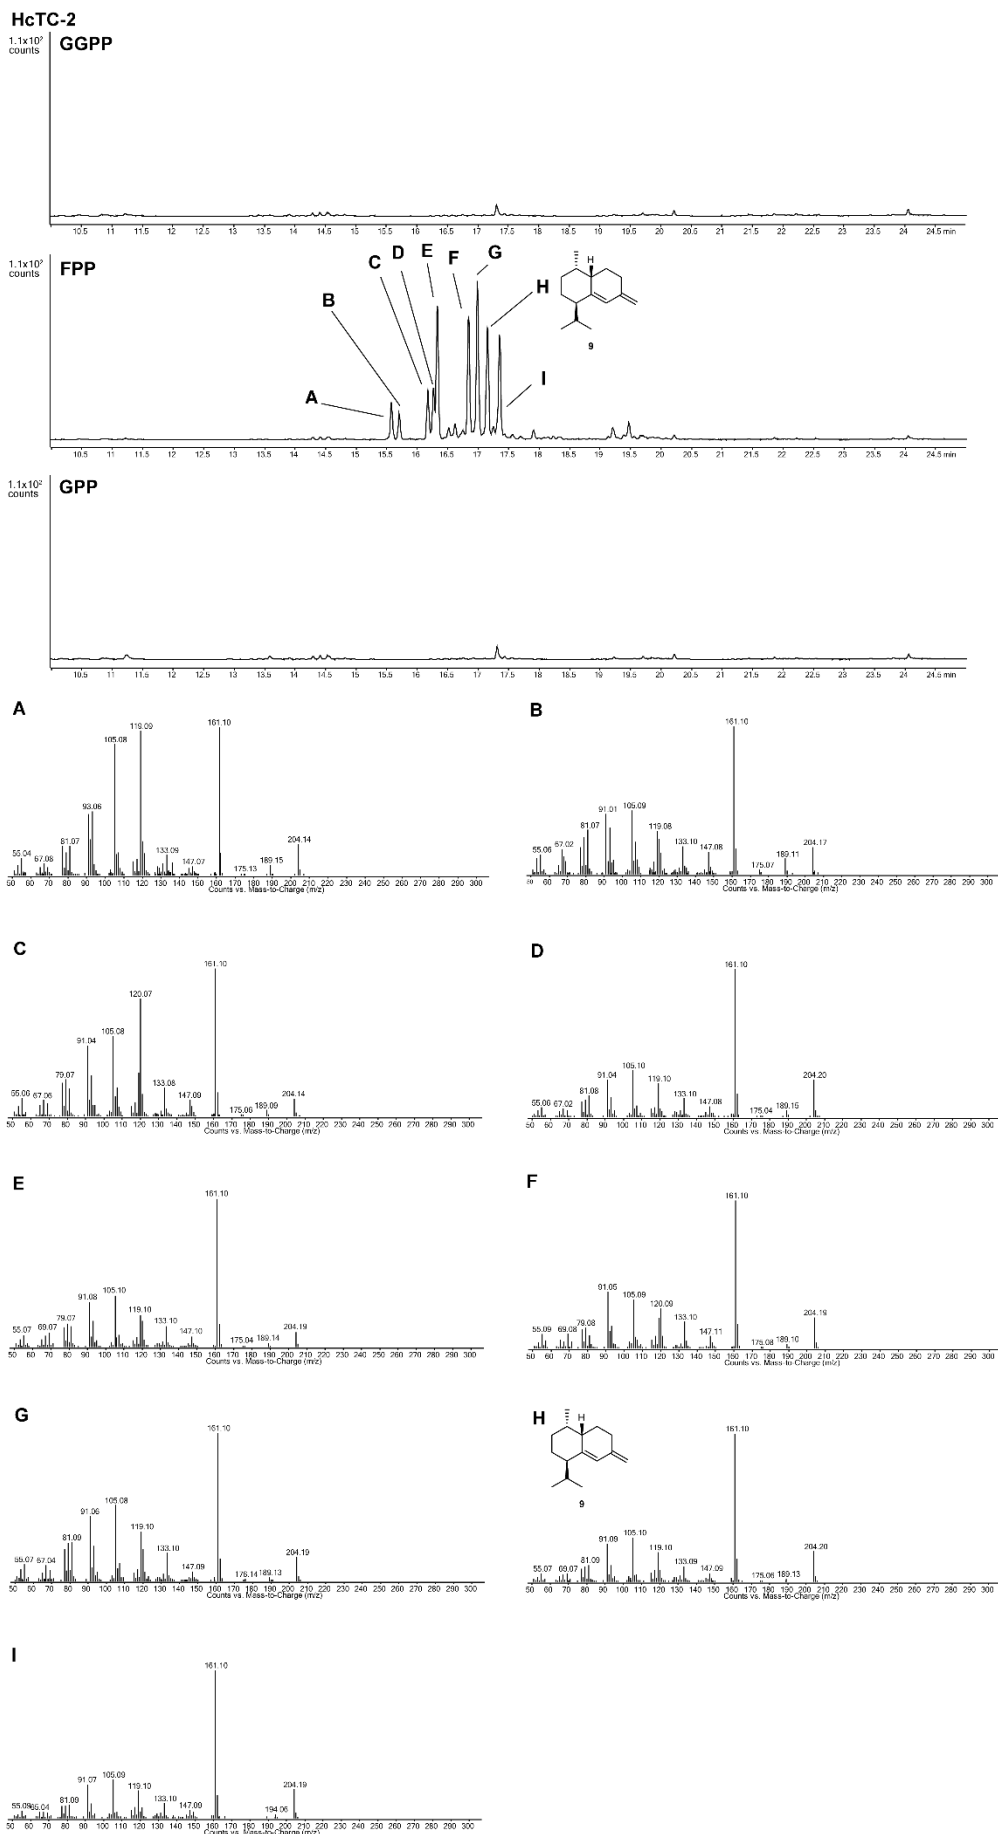

**Supplementary Fig. 12.** GCMS analysis of HcTC-2 with the substrates GGPP (top) FPP (middle) and GPP (bottom). Mass spectra for major peaks are shown. The absolute configuration of **9** produced by this enzyme was not determined.

### HcTC-3

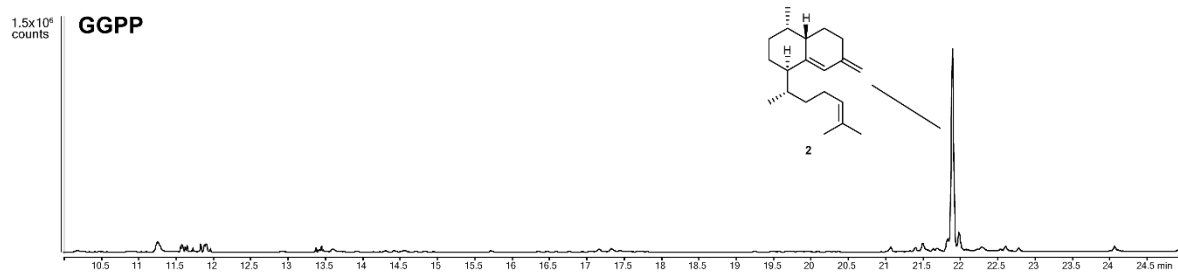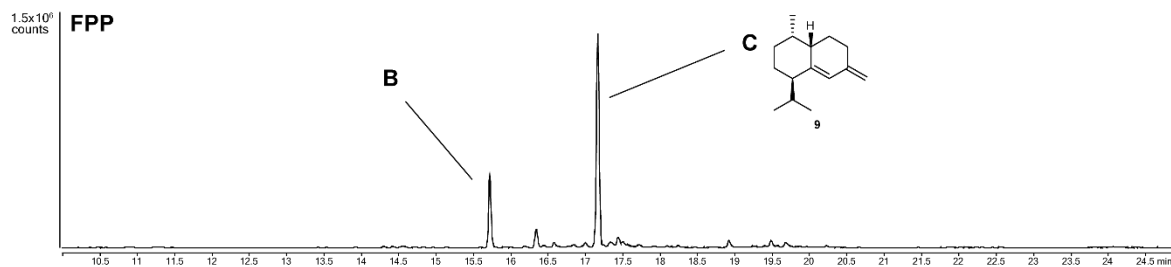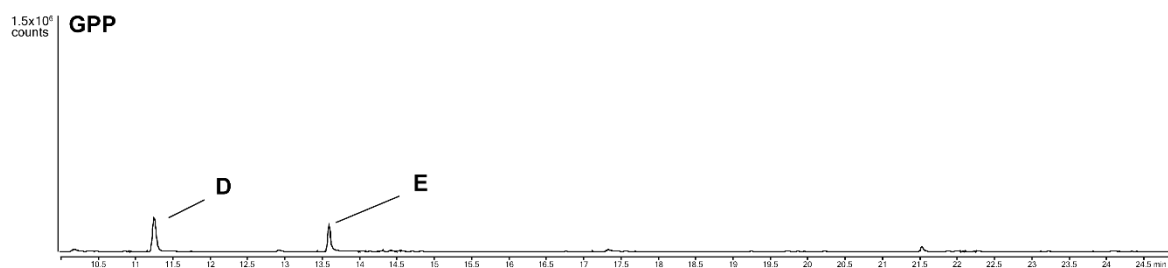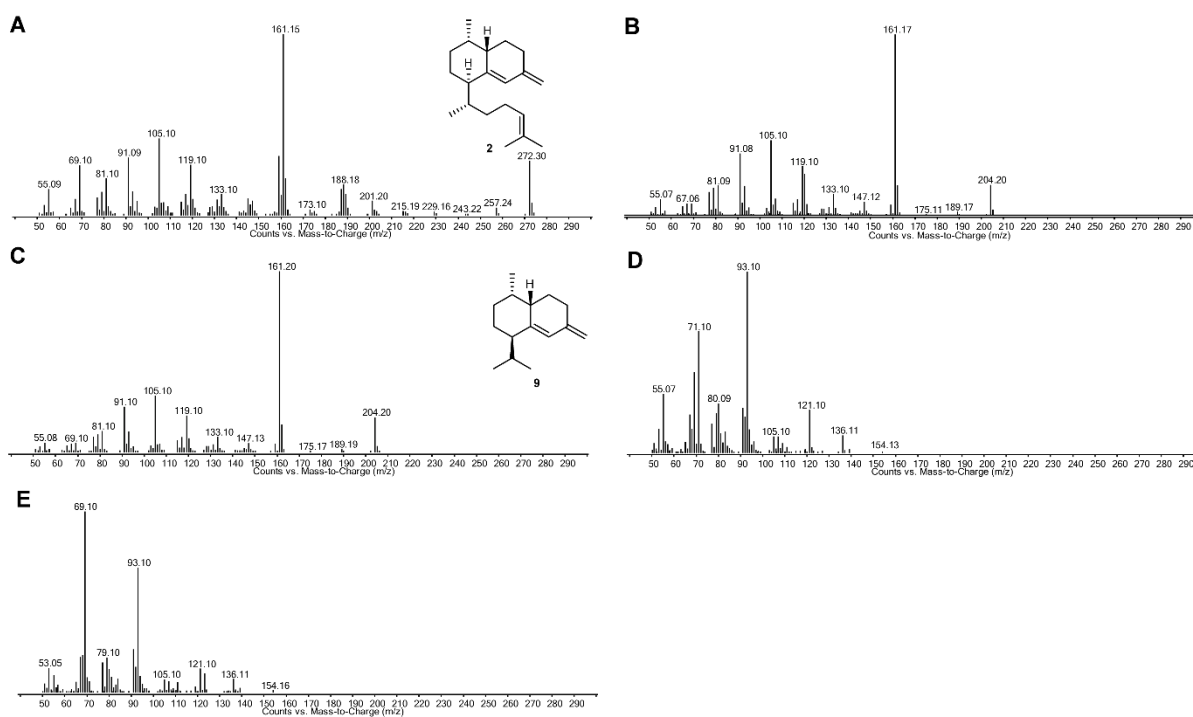

**Supplementary Fig. 13.** GCMS analysis of HcTC-3 with the substrates GGPP (top) FPP (middle) and GPP (bottom). Mass spectra for major peaks are shown.

### PbTC-1

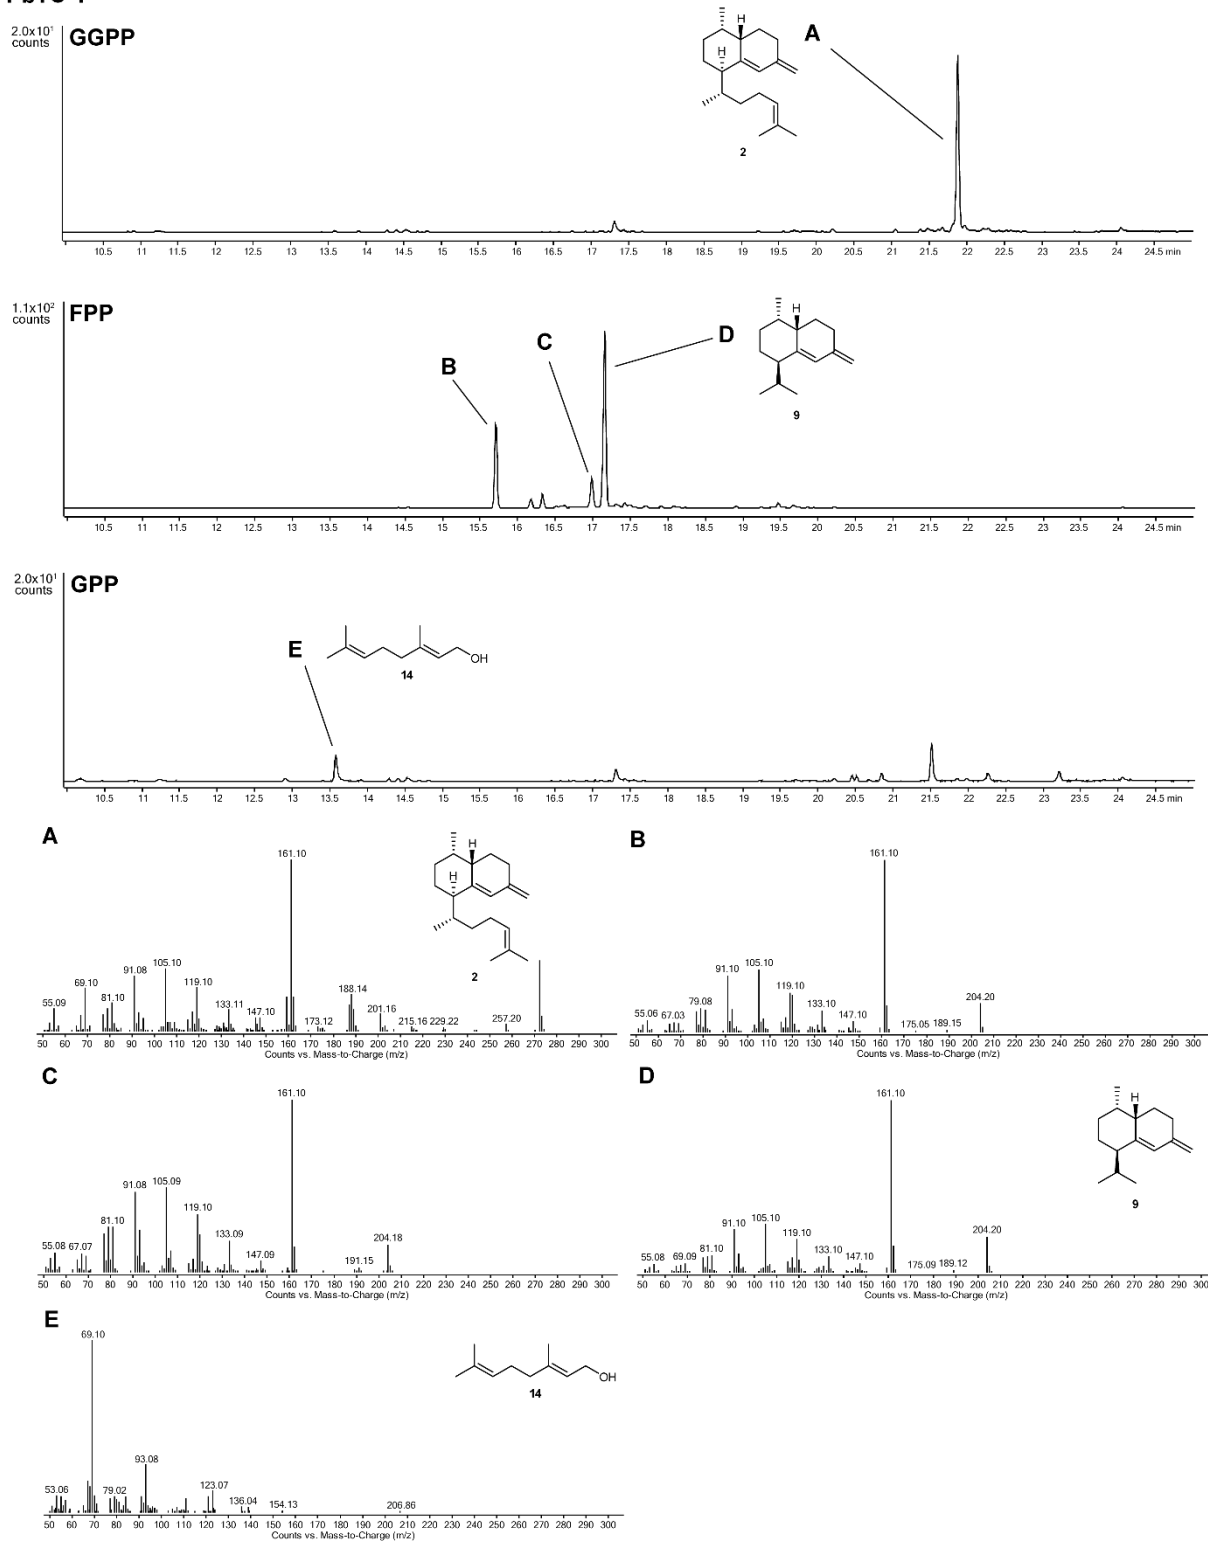

**Supplementary Fig. 14.** GCMS analysis of PbTC-1 with the substrates GGPP (top) FPP (middle) and GPP (bottom). Mass spectra for major peaks are shown.

### RmTC-1

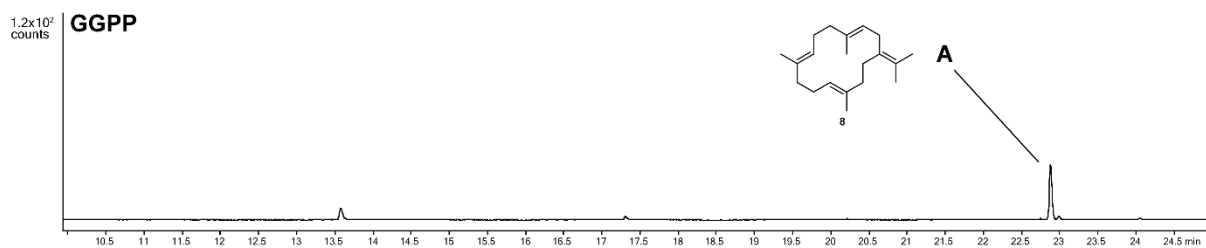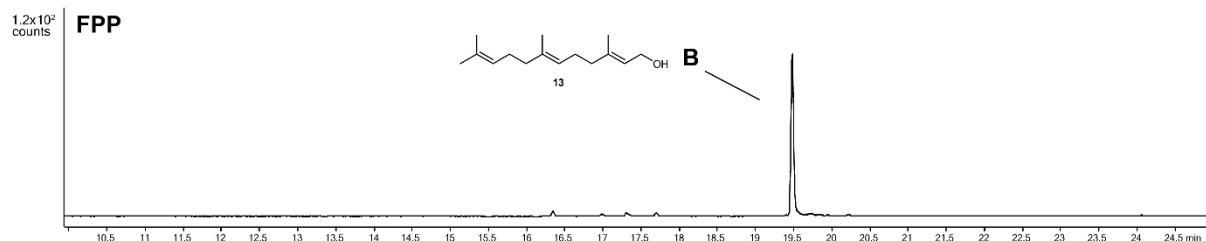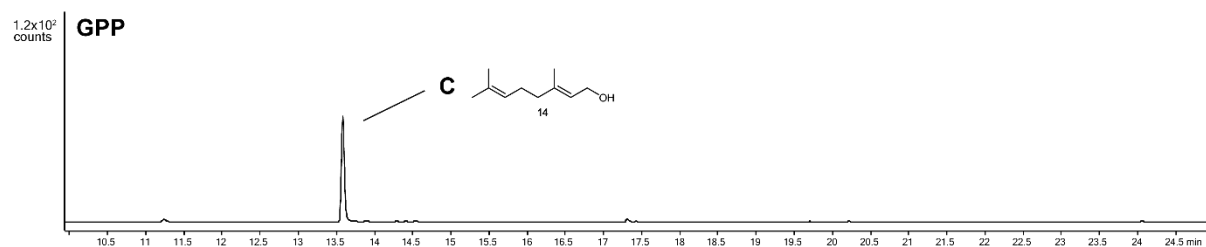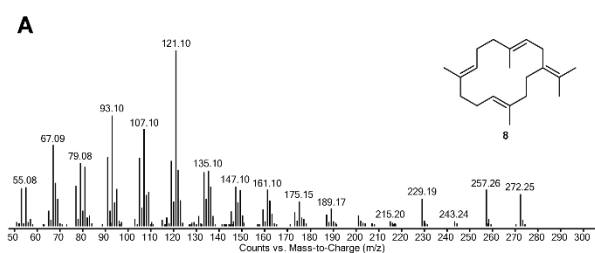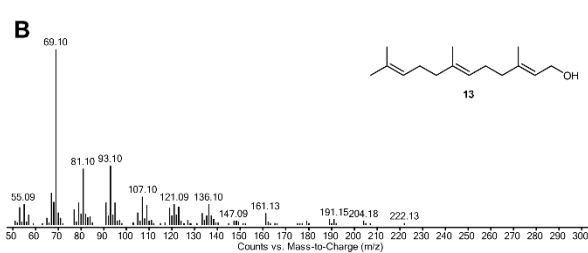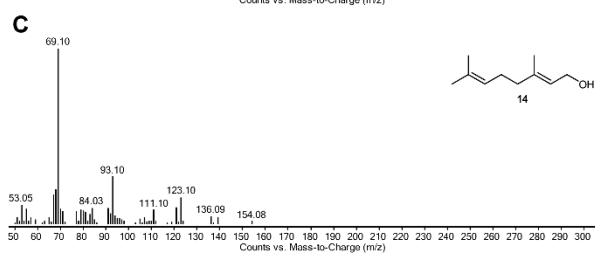

**Supplementary Fig. 15.** GCMS analysis of RmTC-1 with the substrates GGPP (top) FPP (middle) and GPP (bottom). Mass spectra for major peaks are shown.

### TmTC-1

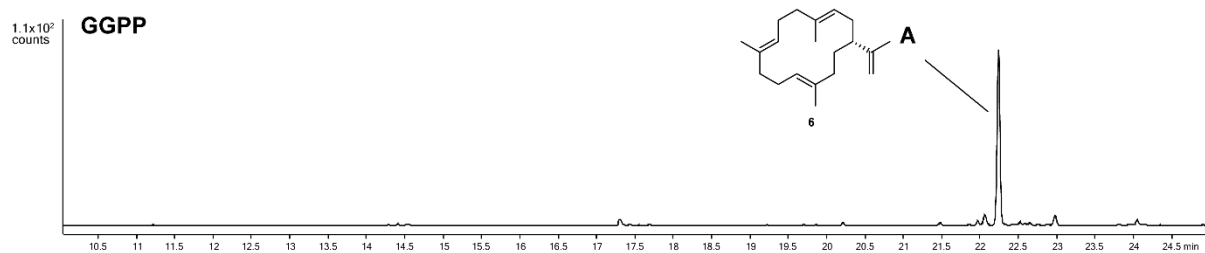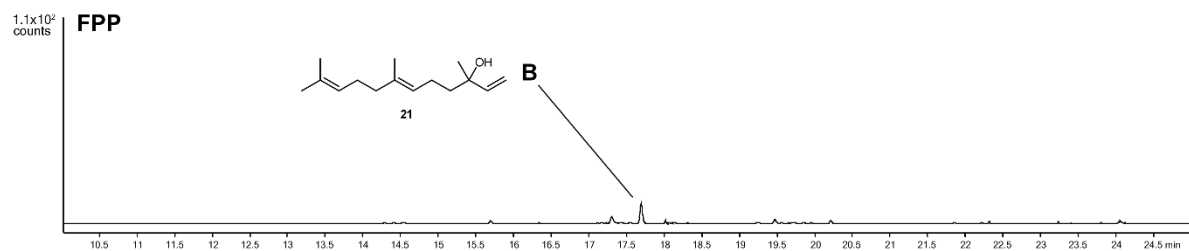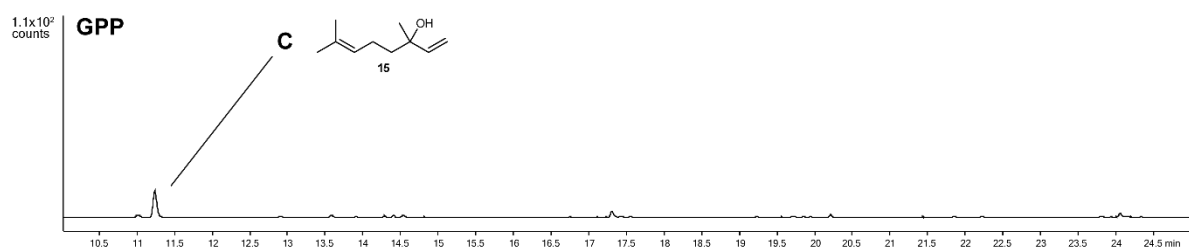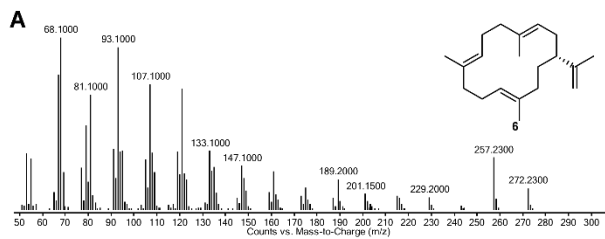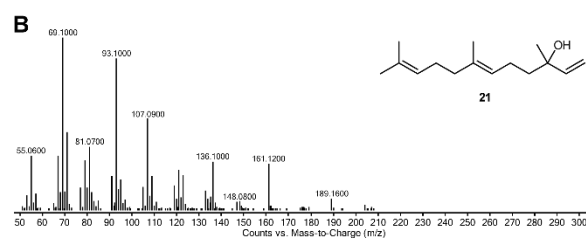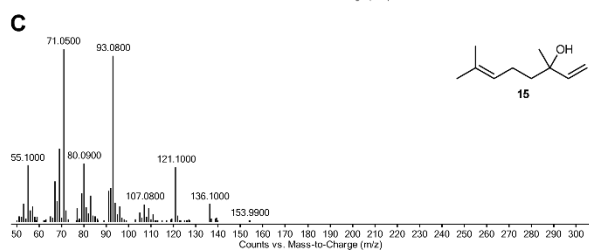

**Supplementary Fig. 16.** GCMS analysis of TmTC-1 with the substrates GGPP (top) FPP (middle) and GPP (bottom). Mass spectra for major peaks are shown. The absolute configuration of **6** produced by this enzyme was not determined.

**TmTC-2**

1.1x10<sup>2</sup> counts  
**GGPP**

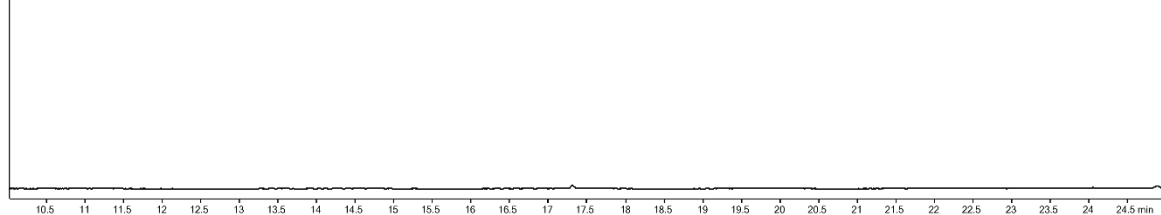

1.1x10<sup>2</sup> counts  
**FPP**

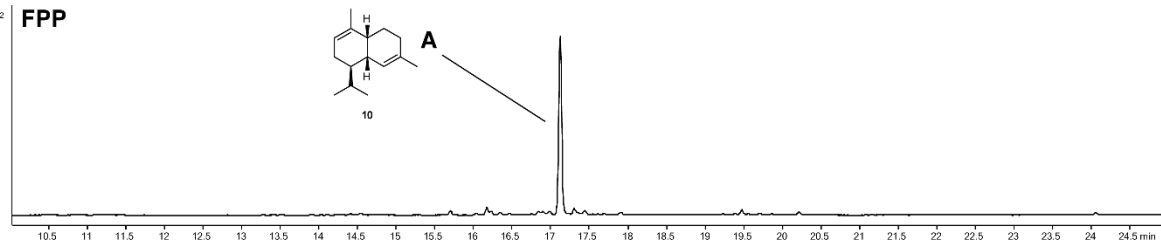

1.1x10<sup>2</sup> counts  
**GPP**

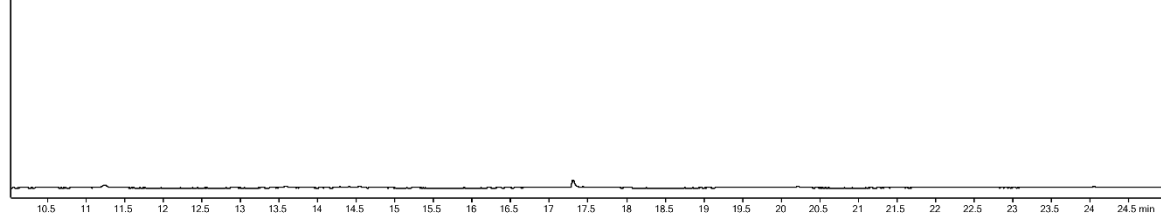

**A**

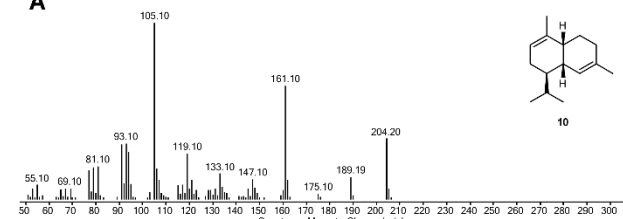

**Supplementary Fig. 17.** GCMS analysis of TmTC-2 with the substrates GGPP (top) FPP (middle) and GPP (bottom). Mass spectra for major peaks are shown.

### XsTC-1

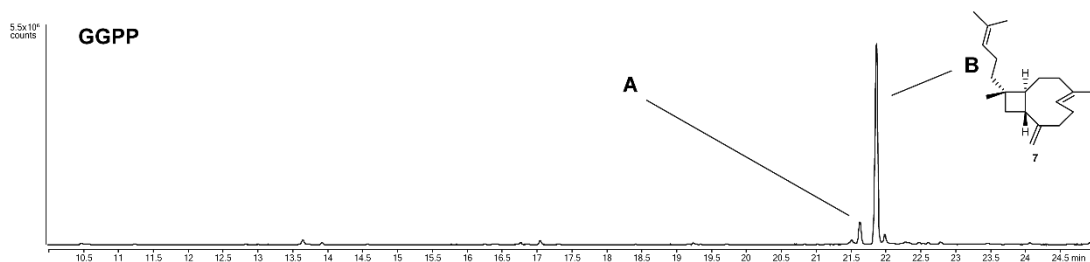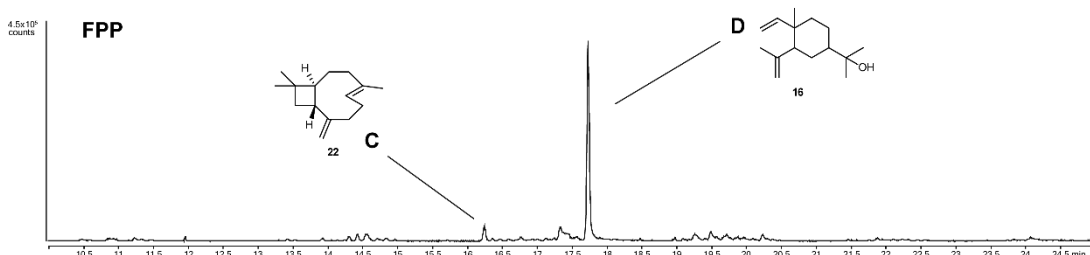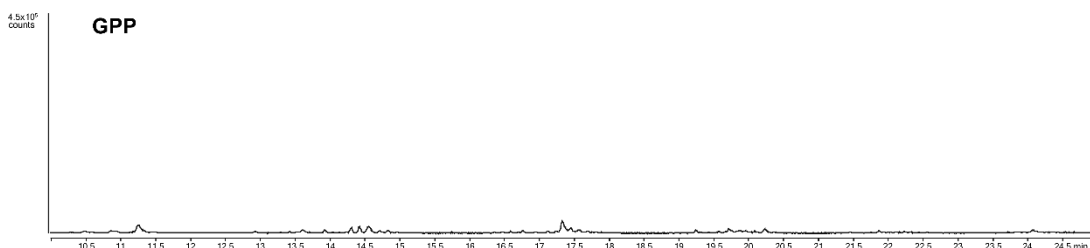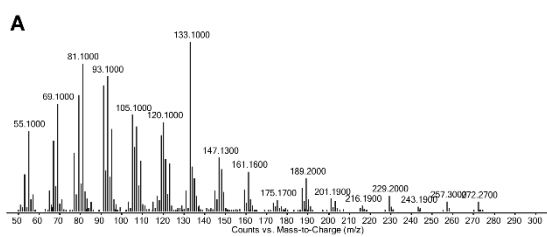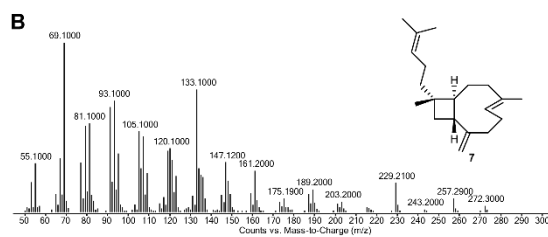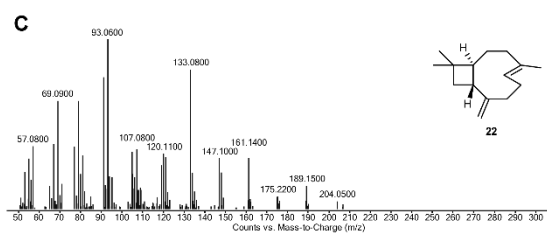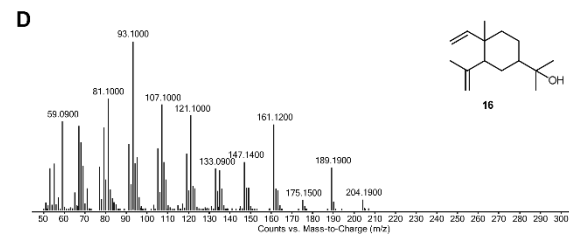

**Supplementary Fig. 18.** GCMS analysis of XsTC-1 with the substrates GGPP (top) FPP (middle) and GPP (bottom). Mass spectra for major peaks are shown.

$\beta 1$     $\alpha 1$     $\alpha 2$     $\alpha 3$   
 ErTC-2   1   20   30   40   0.000  
 ErTC-2   . . . . . MS.GEIVRAQSNWITPHKKMLKE.DED..QEIAPDKLISWVSTIGVG.PE.FOQ  
 DgTC-1   . . . . . MWCKEVRVPRQWAVLQEVLYKE.KPD..PELVLDIDGMILKILTECDIV.PE.NVV  
 DgTC-2   . . . . . MF.SDNVRVPEKWTISHKKMLAEHEED..KEILALDKLLWVKEIGLT.PE.AAS  
 ErTC-1   MSISQMVFSELRVPEKESKYHFDLVKE.FID..PELFSDEDLFDVWEDLGLTDDK.SVY  
 BaTC-1   . . . . . MVFSKEIHAPKWKVEKGGKLLDE.EVD..EQLEGLQELIDTFIQCDLDC.DE.TTV  
 BaTC-2   . . . . . MTKPFVTRVTRVVKFHARVLSQ.PPI..ENFTRMEQLINWGVACGVV.ME.AGT  
 XsTC-1   . . . . . MSEKNVVRTPMKWGRIFEREILTQ.NTI..PELVDTNRLLISWVKECNLA.DE.ALV  
 HcTC-1   . . . . . MAFSKPIYAPKKAWEKAKGVITSM.NEE..KOLVGMDELINWVAECCLA.GE.AIV  
 HcTC-2   . . . . . MACSEEMVPEKEMTKYHHDLVKE.VKR..ADLEADDEVAKWVWGLGLS.DK.PAT  
 HcTC-3   . . . . . MSCSEVRAVRKVVORREMKV.KVD..DNLISHDLELLELVCGLLC.DE.ASV  
 RmTC-1   . . . . . ML.RTEVKIPEVWCIFCDLKCST.FPG..L.LKKDIIIDWCVRITGITAR.RTA  
 TmTC-1   . . . . . MACGKELRIPKEWSKYHHAIVNE.PID..PELPSLDELCAWIKLDLDLDCNR.K.SDV  
 TmTC-2   . . . . . MSCSKEIRTPSDWASVQRKSMQE.GPD..ESILDFEELANWLRSCGVV.DDQCKV  
 CiTC-1   . . . . . MSCSKEVRRPEVSKVQVONLCKT.PRD..EDIFGFQELKWLWEDCGAS.DE.ANV  
 PbTC-1   . . . . . MSCSKEIHAPRRVDRHKOEV.L.PQNAVEKLSMNELELELVICGLC.DK.TSI

$\alpha 4$     $\alpha 5$     $\alpha 6$   
 ErTC-2   50   60   70   80   90   100  
 ErTC-2   KLVFKKINAEYLRCLVYVLI.PR.DFKSMKIFQNLNHLFLLILGYIIDDAE.KYNEEMKKE  
 DgTC-1   RAYVKLVKPYVYFIRLLVYPII.PK.DKLCEVACKLIFLHFVISLYGSDRRLEECDDLDIVK  
 DgTC-2   KSVFDNINAYRYLRCLVYPII.PE.DQTGKKLDFQNLNHLFLLVGMVYVDDIT.E.KYSEKMQE  
 ErTC-1   TKYAQRTGGYLFLLLHMVFF.PK.NSLFKKLFKLAHLVPSLFTVDDIT.E.ATSEIEMRO  
 BaTC-1   RKYRGLRPFIMFTSLMFIIL.PE.TKLGREVEKALAHFIMGITLADDIE.KQFSEIARK  
 BaTC-2   RKSFEKLNNAVYLRCLVYVLI.PD.DAWSAEFRINLHFTTAGYVDDIT.E.RYTHMEEWKE  
 XsTC-1   TKYMNVLRFYHFSALVYPII.PD.KDYCREAFAYIEFLVLYLCLDDEBAKCNLELEI  
 HcTC-1   RKYWDTRFVYHFMCLVYVLI.PD.NILCKEFPKYLHASISYIYIADDDIE.KQSRREAKI  
 HcTC-2   EKYIDSTRVYHFMCLAVLV.PS.NFLCRNIFKTVQIYVTFGLFVSDDYIE.QTSLAEVVQ  
 HcTC-3   HKMYERTNIVYFMWTLIPV.PS.DOWOFEIFKTSLHFLCALFLVDDAVE.SYSEKMKKE  
 RmTC-1   EKALDRKPYMYMKILFFPKLKP.D.NFLIASLYELNAVIVIGFTIMDDVE.TYTLGSAIEE  
 TmTC-1   EKYVLAIRFYHTMRYQVYVLI.SREDALCKKLFKMAHTAIAVFIISDDVE.CLSKTEEMQ  
 TmTC-2   RKYVDAIRFVLSIRILRVF.PN.NILCRMHFKFLQYIIGIYIIDDVE.SHYPLEVDEK  
 CiTC-1   RKYEEILNVYATNAIPV.PE.NILCRELCKVKIHFHMITVTDDEBHCSEFDRK  
 PbTC-1   NKMYDKLNTVQEMWCLVDTV.PA.SQYABEIFKSSLHFLCALFLVDDAVE.SYSEKMQE

$\alpha 7$     $\alpha 8$     $\alpha 9$     $\eta 2$   
 ErTC-2   110   120   130   140   150   160  
 ErTC-2   ILAGNLIQSQVSETFN.FPSIFEMKQLGNNR.NDFSRGALITMFDYVNRITLIDEE  
 DgTC-1   KCDIENLKKDEVEEMFK.FPIIKEMQSLKFLS.DSKLLSPVVLNDFVNVKTDLVIEY  
 DgTC-2   LIDGYNLQONQSKTLEK.LPSISKVWKLLEGEAR.NKFSRGAIVTVVYVYVNRITMILLE  
 ErTC-1   VCDGEFFLAGQIRGLQFP.FPIIAEMKQSLLLQKIDEXLPHITLHMDFAVNAKSIQI  
 BaTC-1   MCTTFAHIDAKSRQSFPS.FPATDDIKEVVDASVSKNVAQPIVFLIQPLNKQASILLSH  
 BaTC-2   LCDGVDMLLEKESKLFK.CPSIEEMRCLLQHLK.NKFSAAITMVMDPVNQSALFFLRQ  
 XsTC-1   SCAYDFLDEKLKQCFPR.IPSVEELRSLFPHVK.KERLLALVSLIDSVSRVVSFLKY  
 HcTC-1   ACAAHARIDDOOSTKRFPN.LPTIOEMKQLLSTFS.TPSIVGPIITMADFNRRLARVLLH  
 HcTC-2   VSDSEDMNEQISERFV.IPTHAIKRSLL..KINEKLFHVLVQIDWLNLIANDLQH  
 HcTC-3   MSDADMLLEKQVCKEFC.FPSIEMKQSLKHLK.NFDDASITFCMHVNNKIASVWNE  
 RmTC-1   LDHTRFRTQNKSLPLKDYDIDATIDHPSIR.PYSRSVWAMPDVFNRKARITHTA  
 TmTC-1   ILCNAPQLVVEKTRPQSQ.FSTIAEMKQFLLLQKVDDVKLMPHITFLLDFANVAKIINQ  
 TmTC-2   CYEYDQDGLKLGQFQO.IPSRKKELKNFLAHLK.NEKVISTVTFHMDVFNRTVINLQ  
 CiTC-1   IAALNOENKLSLEFKK.VPSIKEMKQYLOQYMS.DERAISLVTVCMDPFRNRTVLLQH  
 PbTC-1   SRSYDTLEKEVCKTFEN.FPSIEMKQSLMHLK.NFDDRSSITFCMQYVNRITALEEE

$\alpha 10$     $\alpha 11$     $\alpha 12$   
 ErTC-2   170   180   190   200   210   220  
 ErTC-2   EIAEHNVLNRRKLSNAVAVYFDAVLSKTRT..GCEISDGLMWRRCFDATAATAVYMLT  
 DgTC-1   CEYSETAVLDFRRFLNITIEFYLRLGLEKMKM..HRKDTEENKTLWRRIFDGGFLFLPYV  
 DgTC-2   CEICEESVLRNLSNAIAVYFNAILSKTKT..GCKISENEMLYRACFDALSIAVYMTST  
 ErTC-1   SSIPLESVNEYWRRLVVVCSLYYAGVAFEVK..SVRSYSEDVVTGVPVYVYVLLWLPCL  
 BaTC-1   QDFSLDVKEFRDLGYNMMAIYFLRWLEETEL..QKRFSGSILEWRRKAFGGCVFFVLLITA  
 BaTC-2   KTSRDVRDNEIRLSNATVITYQAVRNKRVK..GCKITGSEMLWRRACFDVLAIVSYLAP  
 XsTC-1   SVFPQESVFDFRQFSSISLYNKKVFLHEKRM..LGGVSNKLLWRRITFEGAFVFLMYL  
 HcTC-1   GNWNGVADFRLNSNLVSMVFOAIQAEKTP..NKKNTTLETLWRRIFGGVAAPVSSLIA  
 HcTC-2   QDFSEDDVWDFRMSAWIRAYFDGLKSOVGE..KVKVITDDFMWLRIDGGVGFLLIN  
 HcTC-3   GSTPONVVYVYVRRTSNAISISFOAVLIKAKL..GSNVITGDEMWRVVDGLVITLYQFG  
 RmTC-1   YKPESTRUGAFRRRLAAAVIAYLEMAKRKR..DGNLHEEFLWRRSADNLSFFVLMIA  
 TmTC-1   GNYSKEDVSDVWRRLLVVMISLYYEGVKEVSG..SGGSYSKD.IWTRLLAAGTMVWLIQA  
 TmTC-2   QDFSEEAALVFRRLSNNITLYLQGVQYKRGAGKPSVTVVAVLWNRVFGGAIVTWLFAQ  
 CiTC-1   GNVSDDVFDVYRRCFTITVSLWLGAVMVKRD.GAAQDTVVVWVWTRVHDGLPSPAFILYT  
 PbTC-1   GNTPHHYVYNLRRTSNAISISFOAVLIKSKC..GSILISHMLWRVVDGLVILLYQFG

$\alpha 13$     $\alpha 14$     $\alpha 15$   
 ErTC-2   230   240   250   260   270  
 ErTC-2   EIVKTLVKNHILFVSEFYKFLVLSLIFCVVINDHSERDK...LD..DIDSVVRVWFK  
 DgTC-1   EISEF.SLGRVGHIPTESEMVSFAFVCLVNDYSHKREITME.SI..NCDVSKHHLIS  
 DgTC-2   EIFFEKLVRNQMLTSELYKFLDLSLITFCVYVINDYSERK...LD..DIDSVVRVWFA  
 ErTC-1   EILSGAVGKTEHLISLINEISPLATFSARVVDYSHNREL...VLEHKPVSMVARIAE  
 BaTC-1   EILSGA.LGKLEKHYTALTELYVLGGIYVATLNDVFSYREA...HT..VADNVVKAMVS  
 BaTC-2   ESFTH.AVEKQWFLMELYELYMLGILYSTVINDYSHHREK...LD..DCDNVTKVVMQ  
 XsTC-1   EISSEL.SVTGSNKHIPATEMYLSSLCOMVINDYSHHREK...GL..KVDNISLWHLH  
 HcTC-1   EIAAGC.AIENSKQHIAVITDMHLLSGLFSTTINDYSHFLEK...SS..ICDNVVAALLH  
 HcTC-2   EILVGC.EILGKCKGHVRLITQLVLSLSCVCLINDYSHHRET...VV..TIYNTIKVTIE  
 HcTC-3   EIVLGC.LIKNTEKYMTITELRGLCLYCVINDYSHHRDK...LV..SSDNITKVTIE  
 RmTC-1   EIFFGC.IIADADVPSITLHYMHPYSMLATVINDMSEHRDKDN...DINSLVKLWIK  
 TmTC-1   EIVMSG.AIGKTSSEASLINEIYFIDYFMVINDYSHHREN...GFHSGICNLLQTIYR  
 TmTC-2   EIVPSG.TUGKIGEHITLISELYLALSALYCVINDYSHHREIDAVPT..AGEFVVRVMEFN  
 CiTC-1   EIVSEF.SLQKQNAHIAELTELYCLFGLYVAINDYSHHREMND.TI..FSQSVIKWIK  
 PbTC-1   EIVISG.AIETAQQLIAVVTIELRMLGCLYCVINDYSHHRDK...LA..SSDNITKVTI





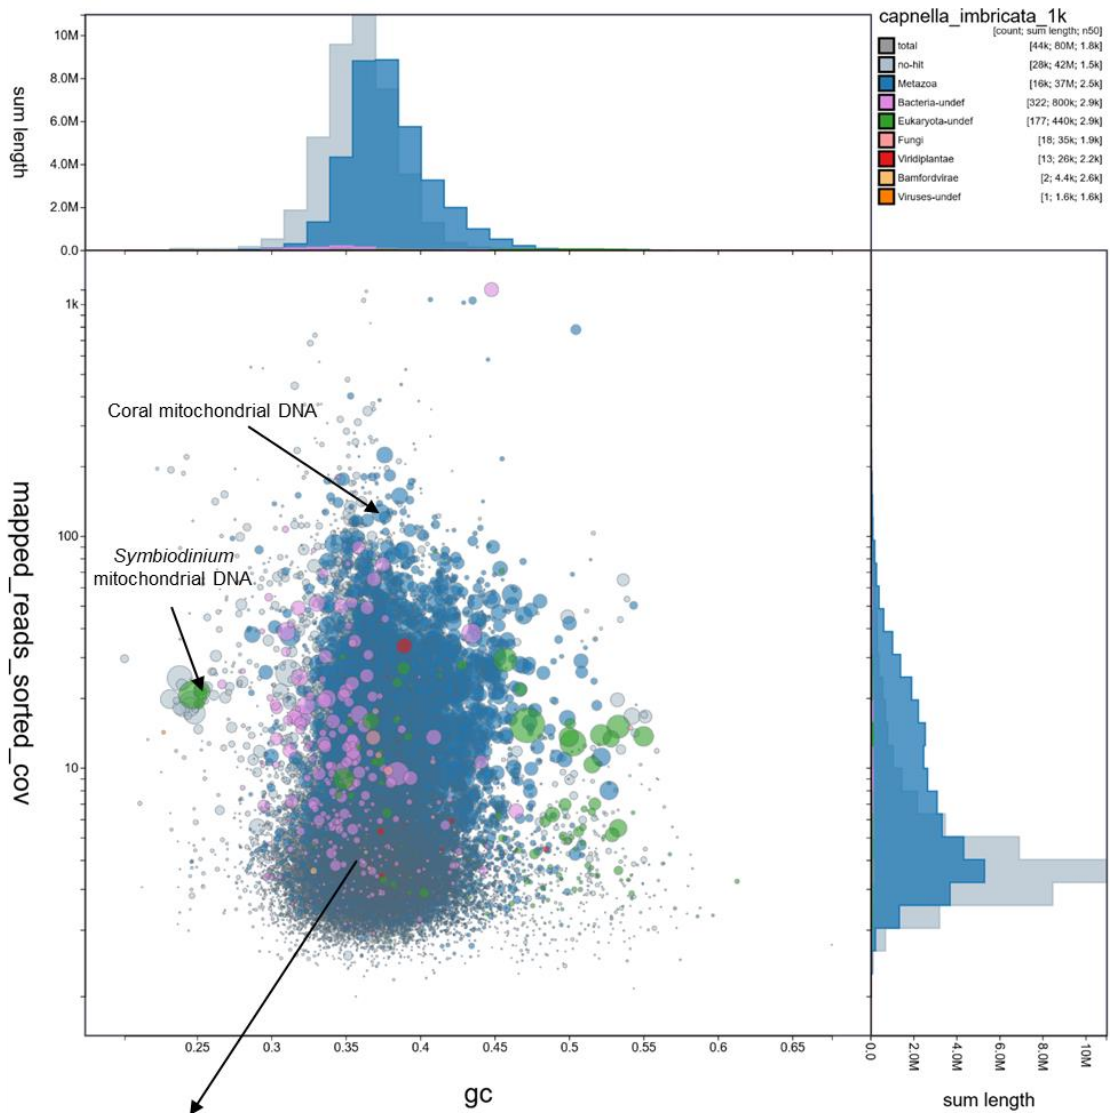

Contig containing CiTC-1: 36% GC and 4x coverage:

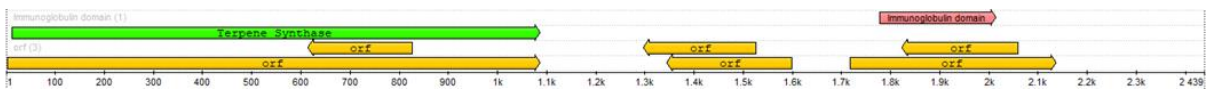

**Supplementary Fig. 20:** GC-vs-coverage blob plot created using Blobtools<sup>42</sup> for contigs 1 kilobasepairs and larger in our assembly for *Capnella imbricata*. Contigs are colored by kingdom as classified by Diamond<sup>43</sup> blastx against the NCBI nr database. Circles are sized in proportion to contig length on a square-root scale, ranging from 1,000 to 22,827. Histograms show the distribution of contig length sum along each axis. Most Symbiodinium genomic and plastid DNA did not assemble into contigs > 1 kilobasepairs. The large spread in coverage is likely due to contigs representing repetitive elements. The contig containing CiTC-1 is shown. It also contains a fragment of a gene with an immunoglobulin domain, however this is sometimes not present when assembled using other parameters or assemblers. Only one full-length terpene cyclase gene could be detected in this and any other assembly of *C. imbricata*, and the sequence of CiTC-1 synthesized was a consensus of that in various assemblies.

## Scaffold statistics

- Log10 scaffold count (total 44k)
- Scaffold length (total 80M)
- Longest scaffold (23k)
- N50 length (1.8k)
- N90 length (1.1k)

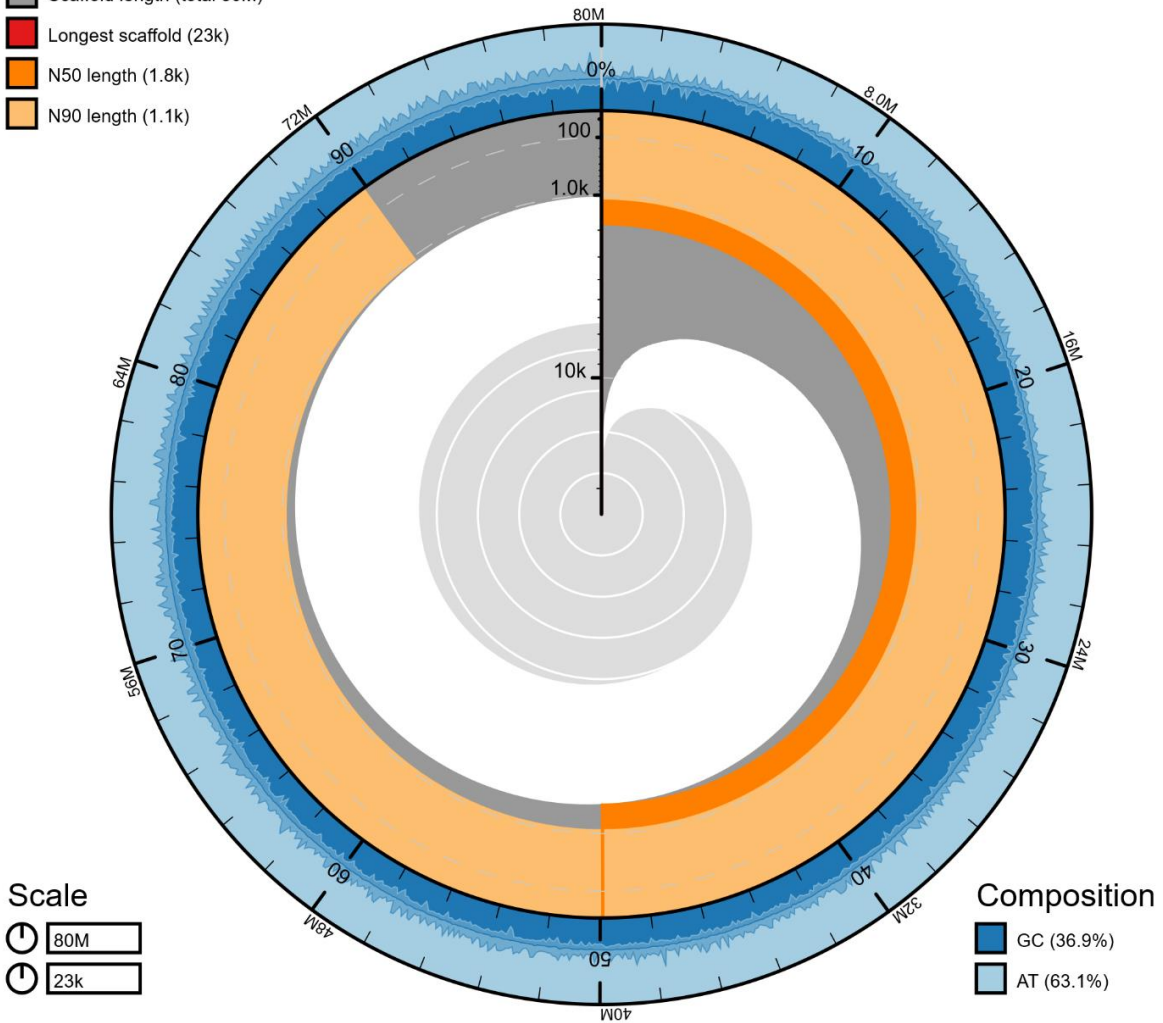

Dataset: capnella\_imbricata\_1k

**Supplementary Fig. 21:** Snail plot created using Blootools for contigs 1 kilobasepairs and larger in our assembly for *Capnella imbricata*. The main plot is divided into 1,000 size-ordered bins around the circumference with each bin representing 0.1% of the 79,762,010 bp assembly. The distribution of record lengths is shown in dark grey with the plot radius scaled to the longest record present in the assembly (22,827 bp). Orange and pale-orange arcs show the N50 and N90 record lengths (1,772 and 1,104 bp), respectively. The pale grey spiral shows the cumulative record count on a log scale with white scale lines showing successive orders of magnitude. The blue and pale-blue area around the outside of the plot shows the distribution of GC, AT and N percentages in the same bins as the inner plot. The assembly has been filtered to only include contigs classified as Metazoa or Unclassified by Diamond blastx against the NCBI nr database.

## Supplementary Note 1 – Structure elucidation

### Diterpene product of HcTC-3 (**2**)

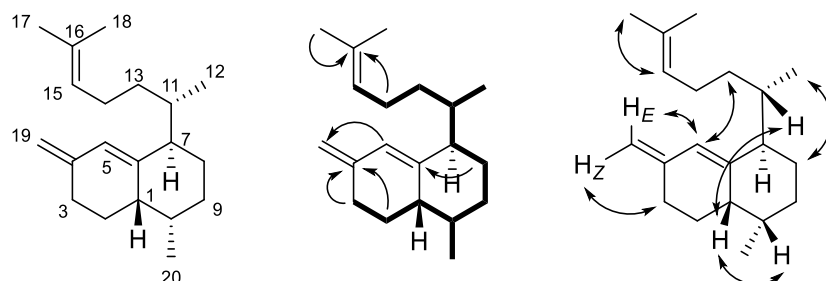

Structure of elisabethatriene (**2**). COSY correlations are shown as bold lines, key HMBC correlations are shown as single headed arrows. Key NOE correlations are shown as double headed arrows.

**Purification by column chromatography:** Pentanes (100%), **yield:** 1.9 mg. **Optical rotary power:**

$[\alpha]_D^{25.0} = +56.8$  (*c* 0.055, MeOH). **NMR:** See table. **EI-MS** (70 eV): *m/z* (%) = 273 (7), 272 (31), 257 (4), 201 (8), 190 (4), 189 (11), 188 (17), 187 (14), 162 (20), 161 (100), 160 (11), 159 (33), 147 (7), 146 (6), 145 (9), 134 (4), 133 (11), 132 (5), 131 (8), 129 (5), 128 (4), 121 (4), 120 (8), 119 (27), 118 (5), 117 (11), 115 (7), 109 (5), 107 (7), 106 (6), 105 (42), 104 (3), 103 (4), 95 (7), 93 (13), 92 (4), 91 (31), 82 (5), 81 (20), 79 (12), 77 (9), 69 (27), 67 (9), 65 (4), 55 (14), 53 (5). The relative configuration in agreement with structural revision<sup>44</sup> after first the report<sup>45</sup>. The absolute configuration derived from enantioselectively synthesized oxidized derivatives<sup>46</sup>

| C  | <sup>13</sup> C | <sup>1</sup> H                                                                                                      |
|----|-----------------|---------------------------------------------------------------------------------------------------------------------|
| 1  | 37.1            | 2.24 (q, <sup>3</sup> <i>J</i> = 6.0)                                                                               |
| 2  | 27.5            | 1.63-1.58 (m)<br>1.53-1.44 (m)                                                                                      |
| 3  | 29.8            | 2.36 (ddd, <sup>2</sup> <i>J</i> = 14.1, <sup>3</sup> <i>J</i> = 9.1, <sup>3</sup> <i>J</i> = 4.6)<br>2.21-2.15 (m) |
| 4  | 143.9           | -                                                                                                                   |
| 5  | 127.5           | 6.14 (s)                                                                                                            |
| 6  | 144.02          | -                                                                                                                   |
| 7  | 50.0            | 1.83-1.79 (m)                                                                                                       |
| 8  | 23.2            | 1.67-1.69 (m, 2H)                                                                                                   |
| 9  | 29.6            | 1.75-1.67 (m)<br>1.21 (ddt, <sup>2</sup> <i>J</i> = 12.4, <sup>3</sup> <i>J</i> = 3.1, <sup>3</sup> <i>J</i> = 3.1) |
| 10 | 35.5            | 1.79-1.75 (m)                                                                                                       |
| 11 | 31.9            | 1.74-1.70 (m)                                                                                                       |
| 12 | 17.7            | 0.9 (d, <sup>3</sup> <i>J</i> = 6.6, 3H)                                                                            |
| 13 | 35.2            | 1.56-1.52<br>1.04 (ddt, <sup>2</sup> <i>J</i> = 13.2, <sup>3</sup> <i>J</i> = 9.4, <sup>3</sup> <i>J</i> = 4.9)     |
| 14 | 25.9            | 2.15-2.09 (m)<br>2.00-1.90 (m)                                                                                      |
| 15 | 125.6           | 5.12 (ddsept, <sup>3</sup> <i>J</i> = 7.1, <sup>3</sup> <i>J</i> = 7.1, <sup>4</sup> <i>J</i> = 1.5)                |
| 16 | 131             | -                                                                                                                   |
| 17 | 25.9            | 1.65 (s, 3H)                                                                                                        |
| 18 | 17.8            | 1.59 (s, 3H)                                                                                                        |
| 19 | 109.0           | 4.86 (s, H <sub>E</sub> )<br>4.78 (s, H <sub>Z</sub> )                                                              |
| 20 | 15.2            | 0.86 (s, 3H)                                                                                                        |

## Diterpene product of BaTC-2 (**4**)

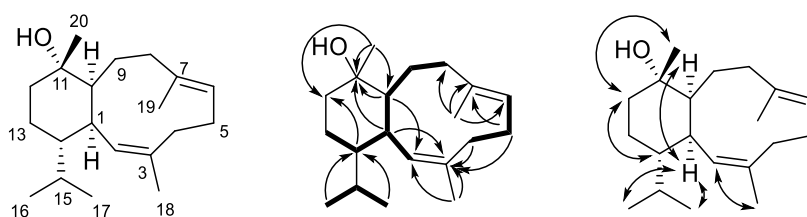

Structure of klysimplexin R (**4**). COSY correlations are shown as bold lines, key HMBC correlations are shown as single headed arrows. Key NOE correlations are shown as double headed arrows.

**Purification by column chromatography:** Hexanes/EtOAc (4:1), **yield:** 1.1 mg. **Optical rotary**

**power:**  $[\alpha]_{\text{D}}^{25.0} = -23.6$  (*c* 0.09,  $\text{CHCl}_3$ ). **NMR:** See table. **EI-MS** (70 eV): *m/z* (%) = 290 (5), 281 (9), 272 (17), 257 (11), 230 (13), 229 (83), 229 (12), 207 (29), 207 (15), 205 (14), 202 (16), 201 (9), 191 (9), 190 (9), 189 (42), 187 (16), 175 (9), 173 (21), 164 (17), 164 (10), 163 (47), 162 (14), 162 (10), 161 (38), 161 (14), 160 (9), 159 (35), 155 (9), 150 (19), 149 (40), 148 (19), 148 (15), 147 (33), 147 (21), 145 (24), 137 (10), 136 (15), 136 (12), 135 (48), 134 (19), 134 (14), 133 (50), 131 (17), 127 (15), 124 (9), 123 (46), 123 (27), 122 (42), 122 (32), 121 (100), 120 (15), 119 (46), 119 (20), 117 (13), 113 (13), 111 (26), 110 (16), 109 (56), 109 (50), 108 (26), 108 (12), 107 (69), 107 (46), 106 (14), 105 (82), 99 (20), 97 (12), 96 (13), 95 (72), 94 (13), 93 (48), 93 (46), 92 (9), 92 (11), 91 (58), 91 (25), 85 (44), 84 (15), 83 (19), 83 (11), 82 (15), 81 (77), 81 (31), 80 (12), 79 (80), 77 (35), 77 (16), 71 (82), 70 (14), 69 (77), 68 (13), 68 (10), 67 (45), 67 (11), 65 (10), 58 (15), 57 (54), 56 (14), 55 (9), 55 (64), 53 (24).

Absolute configuration set after optical rotation<sup>47</sup>. NMR spectra show several minor conformers.

| C  | <sup>13</sup> C | <sup>1</sup> H                            |
|----|-----------------|-------------------------------------------|
| 1  | 37.1            | 2.94-2.88 (m)                             |
| 2  | 131.5           | 5.23-5.27 (m)                             |
| 3  | 133.7           | -                                         |
| 4  | 32.9            | 2.18-2.11 (m)<br>1.77-1.71 (m)            |
| 5  | 26.1            | 2.25-2.20 (m)<br>1.98-1.91 (m)            |
| 6  | 125.2           | 5.34-5.29 (m)                             |
| 7  | 138.0           | -                                         |
| 8  | 40.5            | 2.20-2.14 (m)<br>1.91-1.84 (m)            |
| 9  | 24.6            | 1.50-1.45 (m)<br>1.27-1.22 (m)            |
| 10 | 47.3            | 1.96-1.91 (m)                             |
| 11 | 72.7            | -                                         |
| 12 | 36.3            | 1.41-1.35 (m, 2H)                         |
| 13 | 20.6            | 1.57-1.50 (m)<br>1.42-1.36 (m)            |
| 14 | 45.6            | 0.99-0.94 (m)                             |
| 15 | 26.9            | 1.92-1.86 (m)                             |
| 16 | 22.4            | 0.94 (d, <sup>3</sup> <i>J</i> = 6.8, 3H) |
| 17 | 18.2            | 0.84 (d, <sup>3</sup> <i>J</i> = 6.7, 3H) |
| 18 | 25.2            | 1.68 (s, 3H)                              |
| 19 | 17.5            | 1.54 (s, 3H)                              |
| 20 | 26.7            | 1.13 (s, 3H)                              |

## Diterpene product of ErTC-2 (**6**)

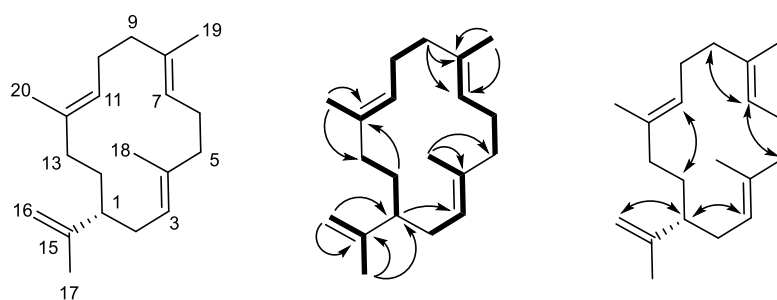

Structure of cembrene A (**6**). COSY correlations are shown as bold lines, key HMBC correlations are shown as single headed arrows. Key NOE correlations are shown as double headed arrows.

**Purification by column chromatography:** Pentanes (100%), yield: 3.4 mg. **Optical rotary power:**  $[\alpha]_D^{25.0} = -28.0$  (*c* 0.02,  $\text{CHCl}_3$ ). **NMR:** See table. **EI-MS** (70 eV):  $m/z$  (%) = 272 (7), 272 (3), 258 (6), 257 (21), 229 (4), 216 (6), 215 (6), 207 (5), 203 (4), 201 (7), 191 (4), 190 (4), 189 (17), 187 (6), 176 (5), 175 (7), 175 (6), 173 (6), 163 (5), 162 (8), 161 (4), 161 (17), 160 (4), 159 (5), 159 (4), 149 (9), 148 (15), 147 (25), 145 (6), 137 (3), 136 (6), 136 (4), 135 (21), 134 (20), 133 (33), 131 (4), 123 (16), 122 (17), 121 (66), 120 (22), 119 (6), 119 (25), 117 (3), 109 (25), 108 (33), 107 (70), 106 (13), 105 (28), 96 (5), 95 (33), 94 (36), 93 (93), 92 (4), 92 (15), 91 (37), 82 (9), 81 (67), 80 (17), 79 (48), 78 (3), 77 (25), 69 (22), 68 (100), 67 (76), 66 (4), 65 (11), 55 (31), 53 (33).

The absolute configuration was set after optical rotation <sup>48</sup>

| C  | <sup>13</sup> C (δ in ppm) | <sup>1</sup> H (δ in ppm,)     |
|----|----------------------------|--------------------------------|
| 1  | 46.5                       | 2.25-2.19 (m)                  |
| 2  | 33.0                       | 2.19-2.13 (m)<br>2.05-1.99 (m) |
| 3  | 124.5                      | 5.35-5.30 (m)                  |
| 4  | 134.9                      | -                              |
| 5  | 39.4                       | 2.18-2.12 (m, 2H)              |
| 6  | 25.3                       | 2.32-2.24 (m)<br>2.17-2.10 (m) |
| 7  | 126.5                      | 5.10-5.05 (m)                  |
| 8  | 133.5                      | -                              |
| 9  | 39.9                       | 2.12-2.06 (m, 2H)              |
| 10 | 24.2                       | 2.18-2.12 (m, 2H)              |
| 11 | 122.3                      | 5.28-5.23 (m)                  |
| 12 | 137.8                      | -                              |
| 13 | 34.3                       | 2.07-2.00 (m)<br>1.98-1.90 (m) |
| 14 | 28.5                       | 1.84-1.77 (m)<br>1.45-1.36 (m) |
| 15 | 149.2                      | -                              |
| 16 | 110.8                      | 4.84-4.82 (m, 2H)              |
| 17 | 19.4                       | 1.68 (s, 3H)                   |
| 18 | 15.6                       | 1.55 (s, 3H)                   |
| 19 | 15.4                       | 1.54 (s, 3H)                   |
| 20 | 18.3                       | 1.61 (s, 3H)                   |

## Diterpene product of XsTC-1 (7)

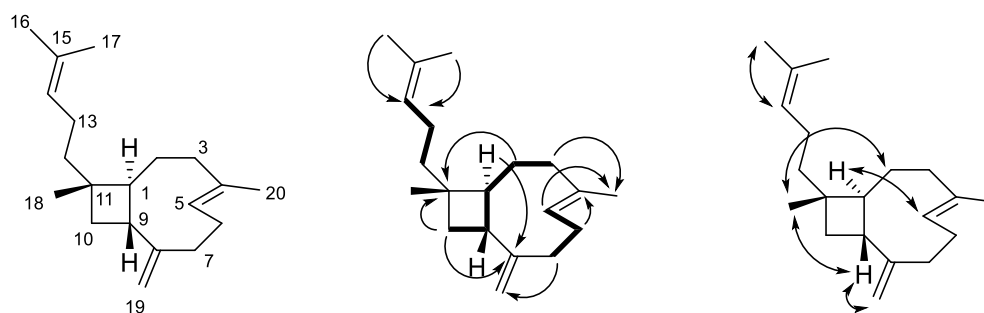

Structure of xeniaphyllene (7). COSY correlations are shown as bold lines, key HMBC correlations are shown as single headed arrows. Key NOE correlations are shown as double headed arrows.

**Purification by column chromatography:** Pentanes (100%), **yield:** 2.5 mg. **Optical rotary power:**  $[\alpha]_D^{25.0} = -12.1$  (*c* 0.18, CHCl<sub>3</sub>). **NMR:** See table. **EI-MS** (70 eV): *m/z* (%) = 272 (3), 257 (7), 230 (4), 229 (17), 203 (6), 201 (4), 190 (5), 189 (13), 188 (4), 187 (10), 175 (7), 173 (6), 162 (6), 161 (24), 160 (4), 159 (11), 149 (10), 148 (18), 147 (29), 146 (5), 145 (9), 137 (8), 136 (20), 135 (21), 134 (25), 133 (72), 132 (3), 131 (9), 123 (21), 122 (11), 121 (30), 120 (37), 119 (36), 118 (4), 117 (8), 115 (5), 109 (23), 108 (10), 107 (45), 106 (26), 105 (48), 103 (4), 96 (4), 95 (34), 94 (13), 93 (66), 92 (18), 91 (63), 83 (6), 82 (10), 81 (52), 80 (12), 79 (51), 78 (8), 77 (29), 70 (6), 69 (100), 68 (10), 67 (32), 66 (4), 65 (10), 55 (28), 53 (17).

The absolute configuration was derived from enantioselectively synthesized oxidized derivatives<sup>49</sup>. NMR spectra show several minor conformers.

| C  | <sup>13</sup> C | <sup>1</sup> H                                         |
|----|-----------------|--------------------------------------------------------|
| 1  | 52.6            | 1.85-1.78 (m)                                          |
| 2  | 30.3            | 1.51-1.44 (m)<br>1.44-1.33 (m)                         |
| 3  | 40.3            | 2.08-2.02 (m)<br>1.98-1.92 (m)                         |
| 4  | 135.1           | -                                                      |
| 5  | 124.9           | 5.39 (dd, <sup>3</sup> <i>J</i> = 9.4, 5.4)            |
| 6  | 29.0            | 2.36-2.32 (m)<br>2.02-1.96 (m)                         |
| 7  | 35.0            | 2.16-2.11 (m)<br>2.00-1.94 (m)                         |
| 8  | 154.7           | -                                                      |
| 9  | 49.0            | 2.35-2.30 (m)                                          |
| 10 | 39.7            | 1.79-1.69 (m, 2H)                                      |
| 11 | 36.2            | -                                                      |
| 12 | 44.6            | 1.51-1.44 (m)<br>1.43-1.37 (m)                         |
| 13 | 23.4            | 2.06-1.98 (m, 2H)                                      |
| 14 | 125.8           | 5.27-5.20 (m)                                          |
| 15 | 130.8           | -                                                      |
| 16 | 25.2            | 1.70 (s, 3H)                                           |
| 17 | 17.7            | 1.60 (s, 3H)                                           |
| 18 | 20.1            | 0.98 (s, 3H)                                           |
| 19 | 112.3           | 5.05 (s, H <sub>Z</sub> )<br>4.87 (s, H <sub>E</sub> ) |
| 20 | 16.5            | 1.58 (s, 3H)                                           |

## Diterpene product of RmTC-1 (**8**)

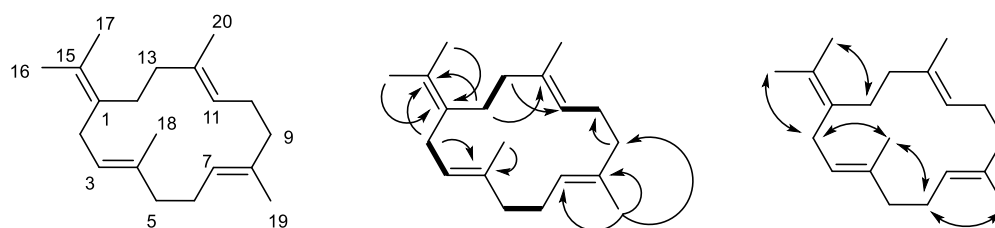

Structure of cembrene C (**8**). COSY correlations are shown as bold lines, key HMBC correlations are shown as single headed arrows. Key NOE correlations are shown as double headed arrows.

**Purification by column chromatography:** Pentanes (100%), **yield:** 1.1 mg. **NMR:** See table. **EI-MS** (70 eV):  $m/z$  (%) = 273 (4), 272 (18), 258 (3), 257 (20), 229 (15), 201 (6), 189 (9), 187 (6), 177 (4), 176 (4), 175 (14), 173 (8), 163 (6), 162 (15), 161 (21), 159 (9), 150 (5), 149 (20), 148 (13), 147 (22), 145 (8), 137 (6), 136 (22), 135 (31), 134 (16), 133 (32), 131 (5), 123 (15), 122 (32), 121 (100), 120 (13), 119 (36), 117 (5), 115 (3), 109 (19), 108 (18), 107 (55), 106 (10), 105 (39), 103 (3), 95 (21), 94 (13), 93 (64), 92 (7), 91 (39), 83 (6), 82 (4), 81 (34), 80 (8), 79 (36), 78 (3), 77 (23), 69 (15), 68 (24), 67 (46), 65 (8), 57 (3), 55 (21), 53 (22).

| C  | $^{13}\text{C}$ | $^1\text{H}$                              |
|----|-----------------|-------------------------------------------|
| 1  | 124.74          | -                                         |
| 2  | 31.0            | 2.91 (d, $^3J = 7.0$ , 2H)                |
| 3  | 125.3           | 5.18 (tq, $^3J = 6.9$ , $^4J = 1.4$ )     |
| 4  | 133.7           | -                                         |
| 5  | 39.3            | 2.14-2.10 (m, 2H)                         |
| 6  | 25.3            | 2.17 (dt, $^3J = 6.3$ , $^3J = 8.7$ , 2H) |
| 7  | 126.8           | 5.05 (tq, $^3J = 6.5$ , $^4J = 1.4$ )     |
| 8  | 133.1           | -                                         |
| 9  | 40.4            | 2.09-2.05 (m, 2H)                         |
| 10 | 24.3            | 2.11-2.08 (m, 2H)                         |
| 11 | 124.66          | 5.16 (tq, $^3J = 6.9$ , $^4J = 1.4$ )     |
| 12 | 134.8           | -                                         |
| 13 | 37.9            | 2.10-2.07 (m, 2H)                         |
| 14 | 31.9            | 2.30 (t, $^3J = 7.7$ , 2H)                |
| 15 | 131.7           | -                                         |
| 16 | 20.7            | 1.67 (s, 3H)                              |
| 17 | 20.9            | 1.70 (s, 3H)                              |
| 18 | 15.4            | 1.56 (s, 3H)                              |
| 19 | 15.1            | 1.52 (s, 3H)                              |
| 20 | 16.0            | 1.61 (s, 3H)                              |



### Sesquiterpene product of HcTC-3 (**9**)

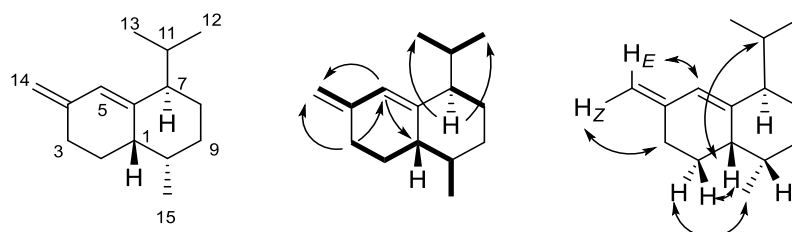

Structure of naphthene (**9**). COSY correlations are shown as bold lines, key HMBC correlations are shown as single headed arrows. Key NOE correlations are shown as double headed arrows.

**Purification by column chromatography:** Pentanes (100%), **yield:** 1.3 mg **Optical rotary power:**  $[\alpha]_D^{25.0} = +5.3$  (*c* 0.19, CHCl<sub>3</sub>). **NMR:** See table. **EI-MS** (70 eV): *m/z* (%) = 204 (20), 162 (15), 161 (100), 147 (5), 133 (9), 131 (3), 120 (7), 119 (19), 117 (8), 115 (6), 107 (4), 106 (4), 105 (27), 103 (3), 93 (10), 92 (4), 91 (24), 81 (9), 79 (9), 77 (8), 69 (4), 67 (4), 65 (3), 55 (4).

The absolute configuration was derived from **2**., sample contains a second sesquiterpene (~20%) of unknown structure, which is not separable by column chromatography.

| C  | <sup>13</sup> C | <sup>1</sup> H                                            |
|----|-----------------|-----------------------------------------------------------|
| 1  | 37.1            | 2.13-2.07, (m)                                            |
| 2  | 27.5            | 1.62-1.53 (m)<br>1.53-1.44 (m)                            |
| 3  | 30.1            | 2.35 (ddd, <i>J</i> = 14.5, 8.4, 4.6 Hz)<br>2.19-2.12 (m) |
| 4  | 144.1           | -                                                         |
| 5  | 127.3           | 6.09 (s)                                                  |
| 6  | 144.2           | -                                                         |
| 7  | 51.5            | 1.69-1.62 (m)                                             |
| 8  | 23.1            | 1.70-1.64 (m)<br>1.64-1.56 (m)                            |
| 9  | 29.6            | 1.70-1.63 (m)<br>1.25-1.17 (m)                            |
| 10 | 35.2            | 1.78-1.75 (m)                                             |
| 11 | 27.5            | 1.75-1.69 (m)                                             |
| 12 | 21.0            | 0.79 (d, <i>J</i> = 6.4, 3H)                              |
| 13 | 21.5            | 0.88 (d, <i>J</i> = 6.3, 3H)                              |
| 14 | 108.9           | 4.88 (s, H <sub>E</sub> )<br>4.80 (s, H <sub>Z</sub> )    |
| 15 | 15.0            | 0.84 (d, <i>J</i> = 7.0, 3H)                              |

Sesquiterpene product of TmTC-2 (**10**)

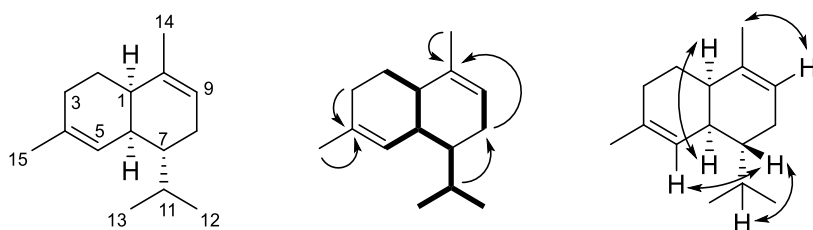

Structure of  $\alpha$ -muroladiene (**10**). COSY correlations are shown as bold lines, key HMBC correlations are shown as single headed arrows. Key NOE correlations are shown as double headed arrows.

**Purification by column chromatography:** Pentanes (100%), **yield:** 2.5 mg. **Optical rotary power:**  $[\alpha]_D^{25.0} = +55.0$  (*c* 0.25,  $\text{CHCl}_3$ ). **NMR:** See table. **EI-MS** (70 eV): *m/z* (%) = 205 (5), 204 (33), 189 (12), 162 (10), 161 (60), 160 (5), 149 (3), 148 (6), 147 (11), 145 (6), 135 (3), 134 (6), 133 (14), 131 (6), 129 (5), 128 (5), 123 (5), 121 (10), 120 (5), 119 (25), 117 (8), 115 (7), 107 (10), 106 (17), 105 (100), 103 (3), 95 (8), 94 (27), 93 (31), 92 (8), 91 (30), 81 (18), 80 (3), 79 (18), 78 (4), 77 (16), 69 (5), 67 (5), 65 (5), 55 (8), 53 (6).

The absolute configuration was set after optical rotation <sup>50</sup>.

| C  | <sup>13</sup> C | <sup>1</sup> H                                                         |
|----|-----------------|------------------------------------------------------------------------|
| 1  | 39.4            | 2.02-1.96 (m)                                                          |
| 2  | 25.0            | 1.82-1.74 (m)<br>1.53-1.43 (m)                                         |
| 3  | 30.7            | 1.90-1.79 (m, 2H)                                                      |
| 4  | 134.4           | -                                                                      |
| 5  | 124.7           | 5.59-5.55 (m)                                                          |
| 6  | 37.2            | 2.16-2.10 (m)                                                          |
| 7  | 41.5            | 1.57-1.48 (m)                                                          |
| 8  | 24.9            | 1.91-1.84 (m)<br>1.82-1.74 (m)                                         |
| 9  | 122.6           | 5.47-5.44 (m)                                                          |
| 10 | 136.1           | -                                                                      |
| 11 | 27.0            | 2.07 (dsept, <sup>3</sup> <i>J</i> = 6.9, <sup>3</sup> <i>J</i> = 4.4) |
| 12 | 21.6            | 0.88 (d, <sup>3</sup> <i>J</i> = 6.9, 3H)                              |
| 13 | 16.1            | 0.87 (d, <sup>3</sup> <i>J</i> = 6.8, 3H)                              |
| 14 | 21.9            | 1.70 (s, 3H)                                                           |
| 15 | 24.1            | 1.67 (s, 3H)                                                           |

## Sesquiterpene product of CiTC-2 (**11**)

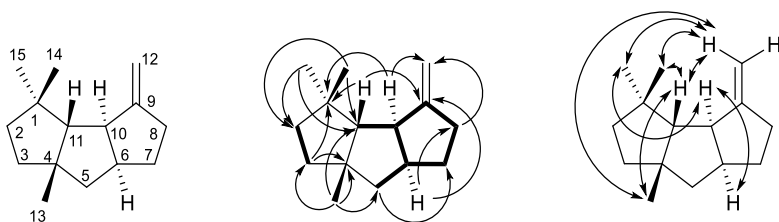

Structure of capnellene (**11**). COSY correlations are shown as bold lines, key HMBC correlations are shown as single headed arrows. Key NOE correlations are shown as double headed arrows.

**Purification by column chromatography:** Pentanes (100%), **yield:** 2 mg. **Optical rotary power:**  $[\alpha]_D^{25.0} = -93.7$  (*c* 0.16, CHCl<sub>3</sub>). **NMR:** See table. **EI-MS** (70 eV): *m/z* (%) = 204 (6), 189 (14), 163 (7), 149 (3), 148 (21), 147 (6), 136 (6), 135 (46), 134 (18), 133 (45), 121 (3), 120 (3), 119 (12), 117 (4), 115 (4), 111 (4), 110 (6), 109 (42), 107 (13), 106 (9), 105 (15), 95 (18), 94 (9), 93 (19), 92 (5), 91 (28), 81 (25), 80 (100), 79 (30), 78 (5), 77 (18), 69 (10), 67 (9), 65 (6), 55 (11), 53 (7).

The absolute configuration set after optical rotation <sup>51</sup>.

| C  | <sup>13</sup> C | <sup>1</sup> H                                                                         |
|----|-----------------|----------------------------------------------------------------------------------------|
| 1  | 42.2            | -                                                                                      |
| 2  | 41.7            | 1.44 (m, 2H)                                                                           |
| 3  | 40.6            | 1.52 (m, 2H)                                                                           |
| 4  | 53.2            | -                                                                                      |
| 5  | 47.9            | 1.61 (m)<br>1.23 (dd, <i>J</i> = 13.1, 9.4 Hz)                                         |
| 6  | 46.1            | 2.44 (m)                                                                               |
| 7  | 29.0            | 1.63 (m)<br>1.43 (m)                                                                   |
| 8  | 31.5            | 2.46 (m)<br>2.34 (m)                                                                   |
| 9  | 158.3           | -                                                                                      |
| 10 | 52.3            | 2.67 (dt, <i>J</i> = 7.8, 2.6 Hz)                                                      |
| 11 | 69.0            | 1.8 (d, <i>J</i> = 2.2 Hz)                                                             |
| 12 | 105.4           | 5.04 (q, <i>J</i> = 2.4, H <sub>E</sub> )<br>4.97 (q, <i>J</i> = 2.4, H <sub>Z</sub> ) |
| 13 | 31.8            | 1.22 (s, 3H)                                                                           |
| 14 | 30.7            | 1.07 (s, 3H)                                                                           |
| 15 | 25.8            | 0.96 (s, 3H)                                                                           |

# NMR spectra

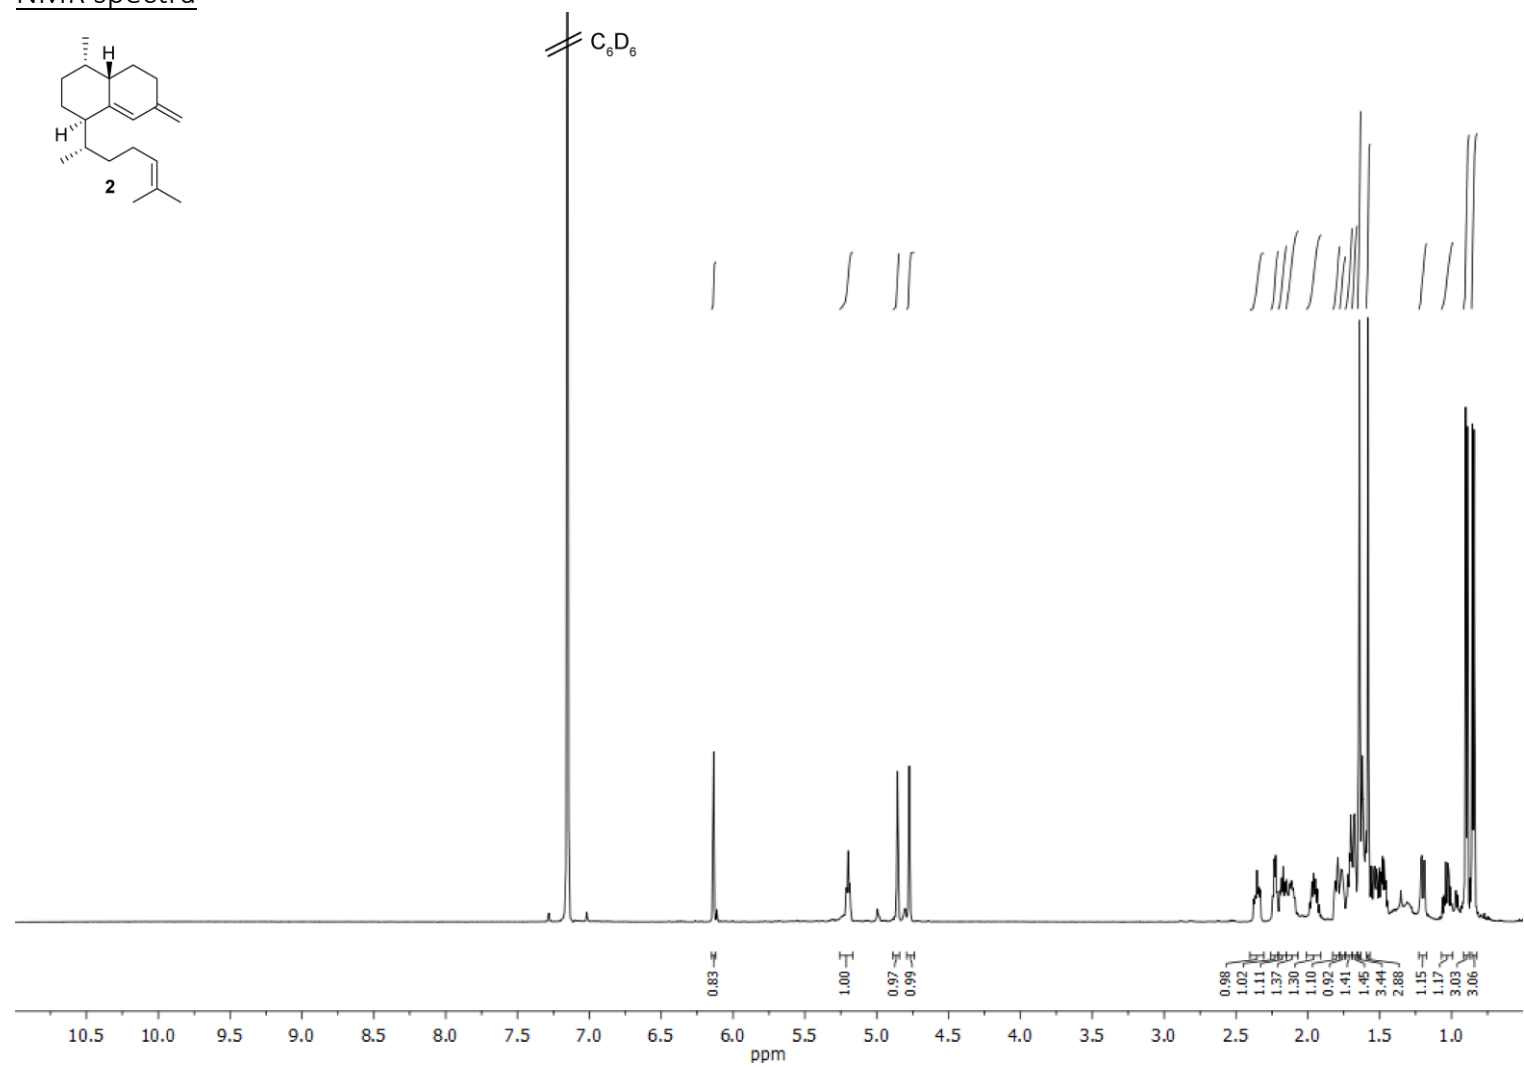

<sup>1</sup>H NMR spectrum (600 MHz) of **2**.

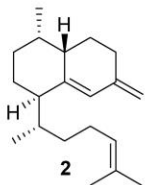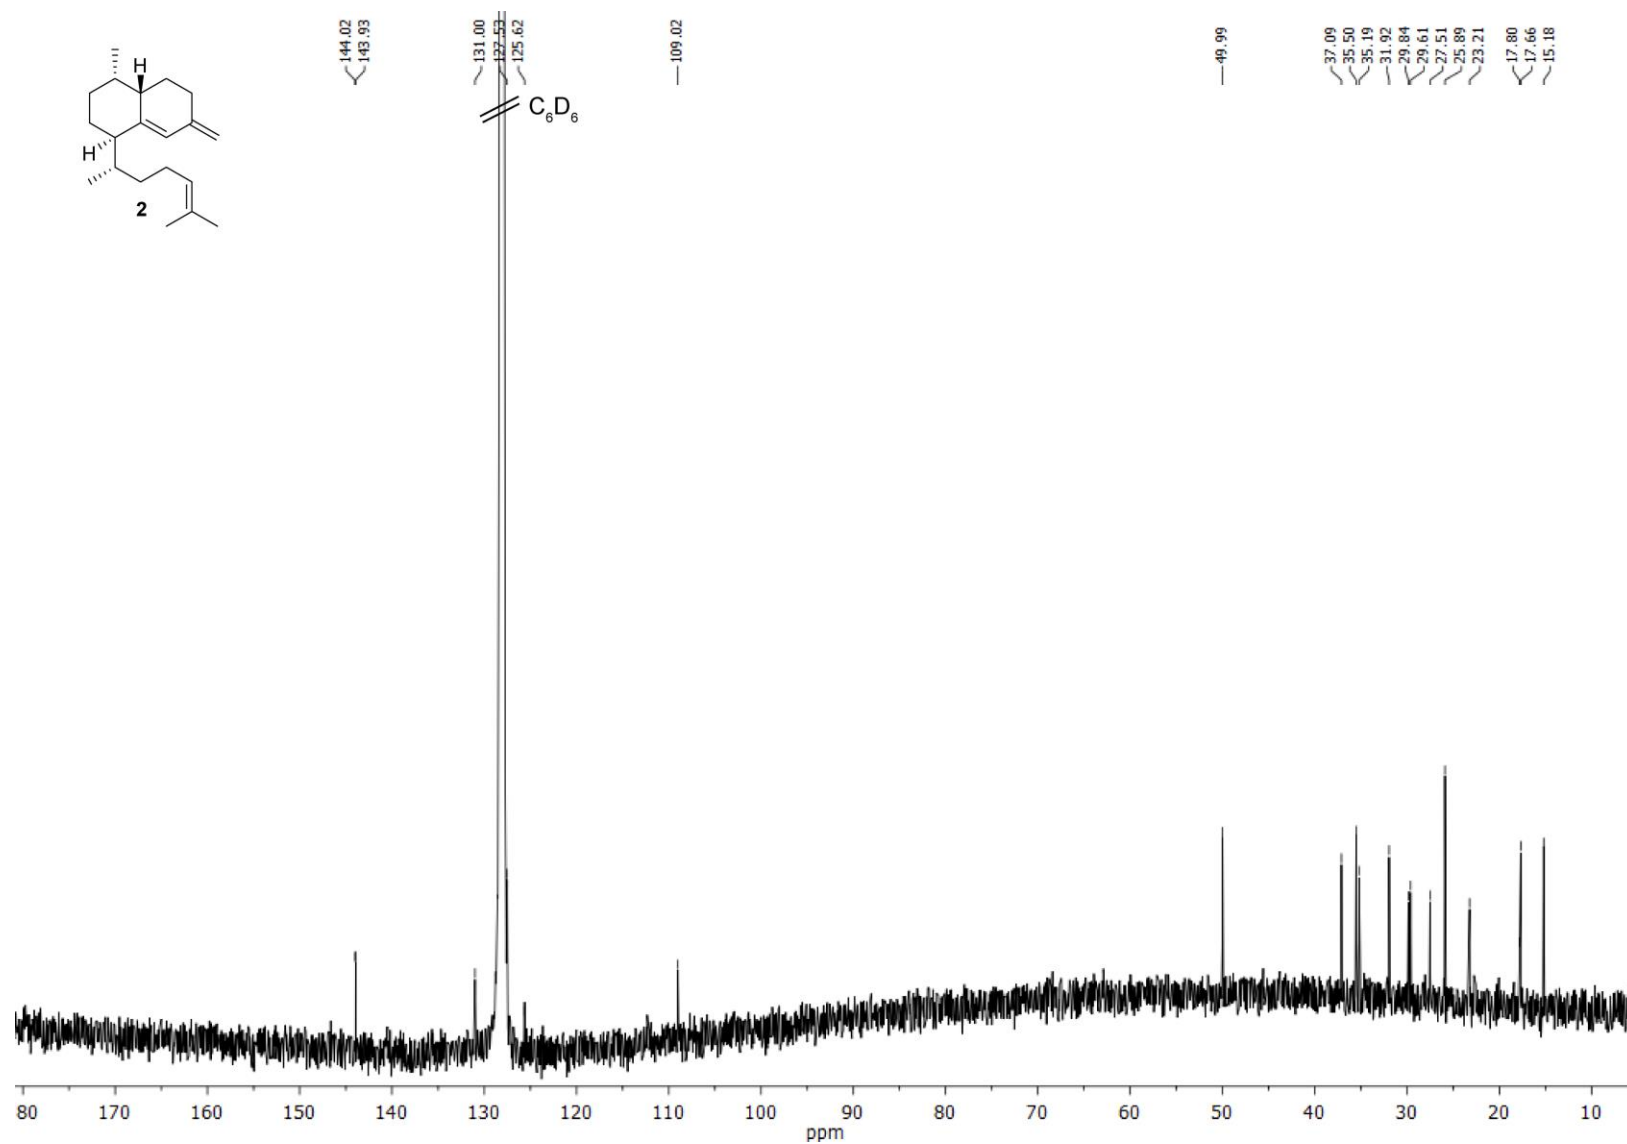

$^{13}\text{C}$  NMR spectrum (125 MHz) of **2**.

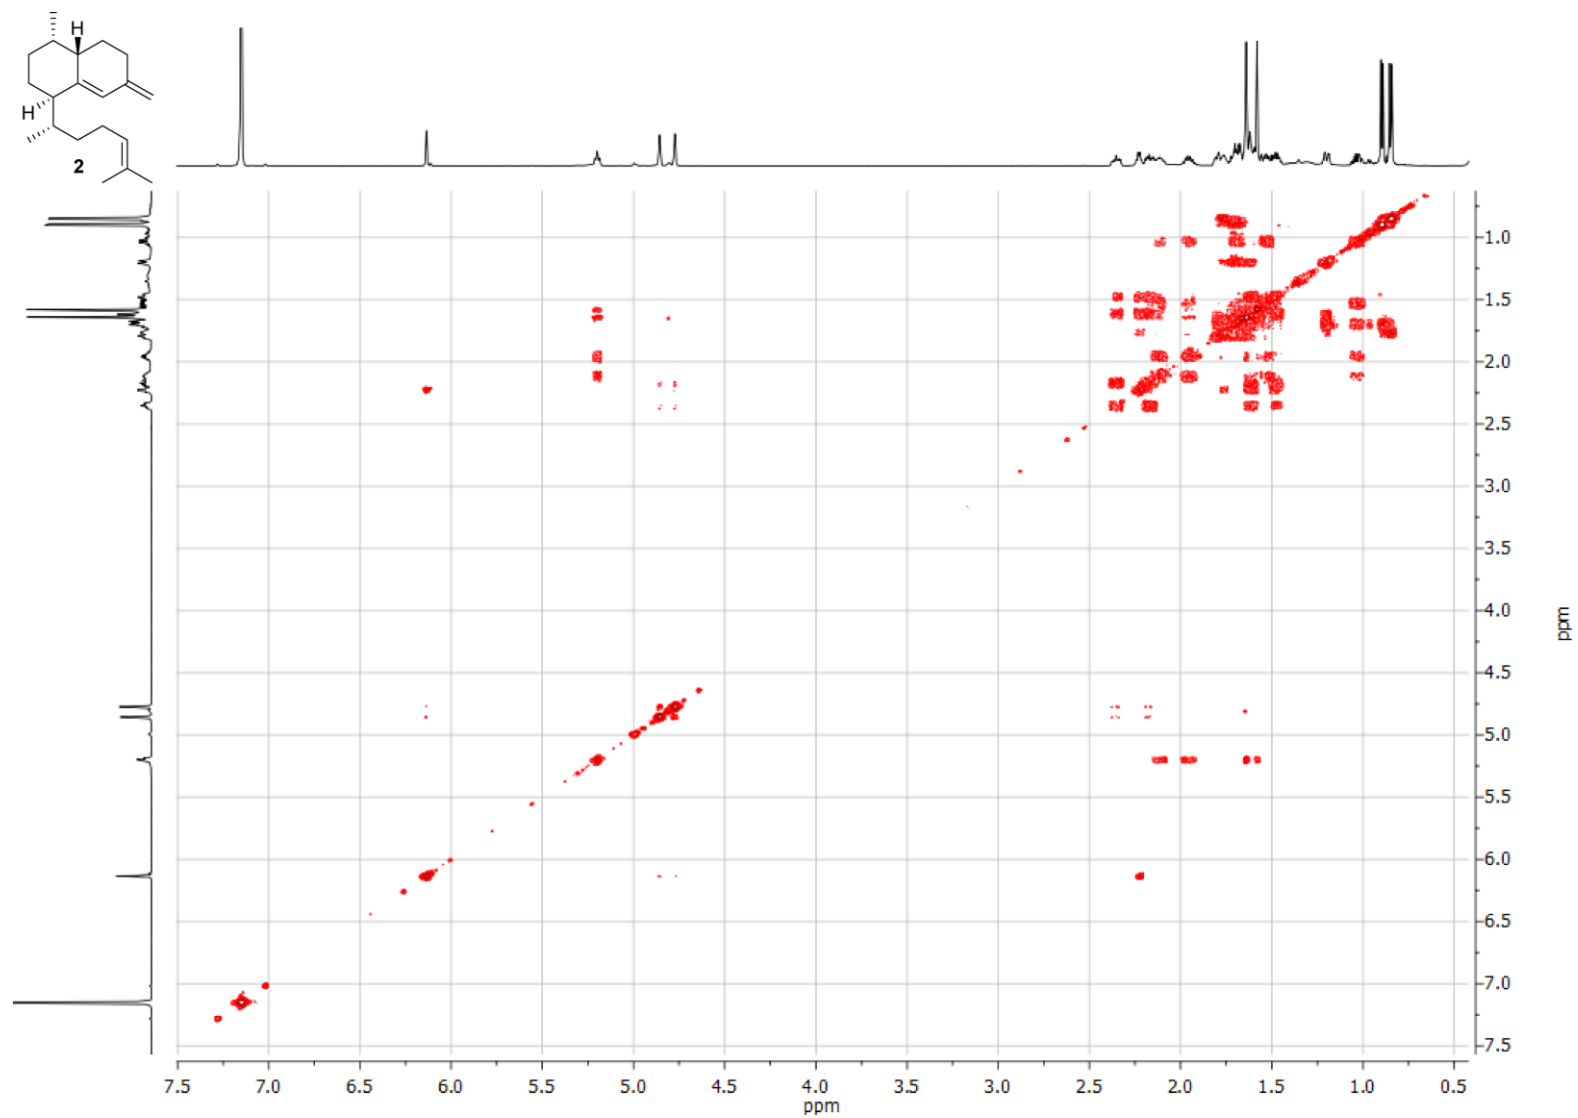

$^1\text{H}$ ,  $^1\text{H}$  COSY spectrum (600 MHz) of **2**.

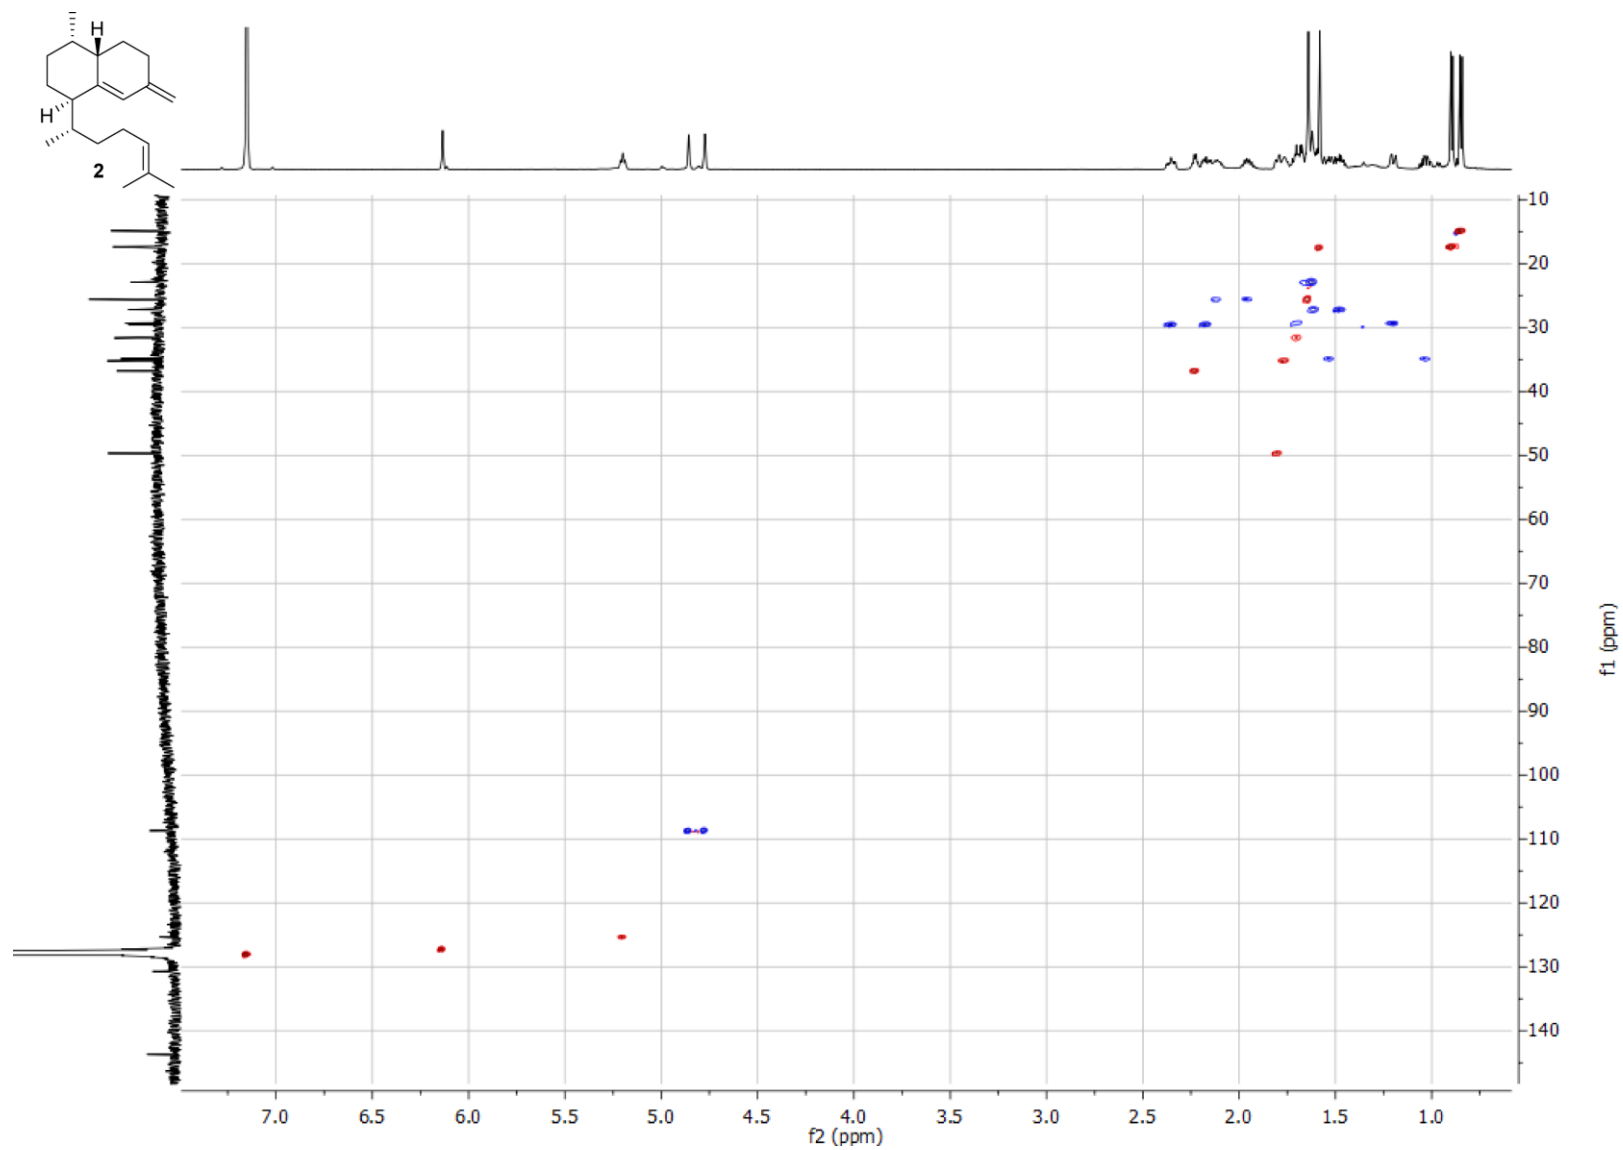

<sup>1</sup>H, <sup>13</sup>C HSQC spectrum (600 MHz) of **2**

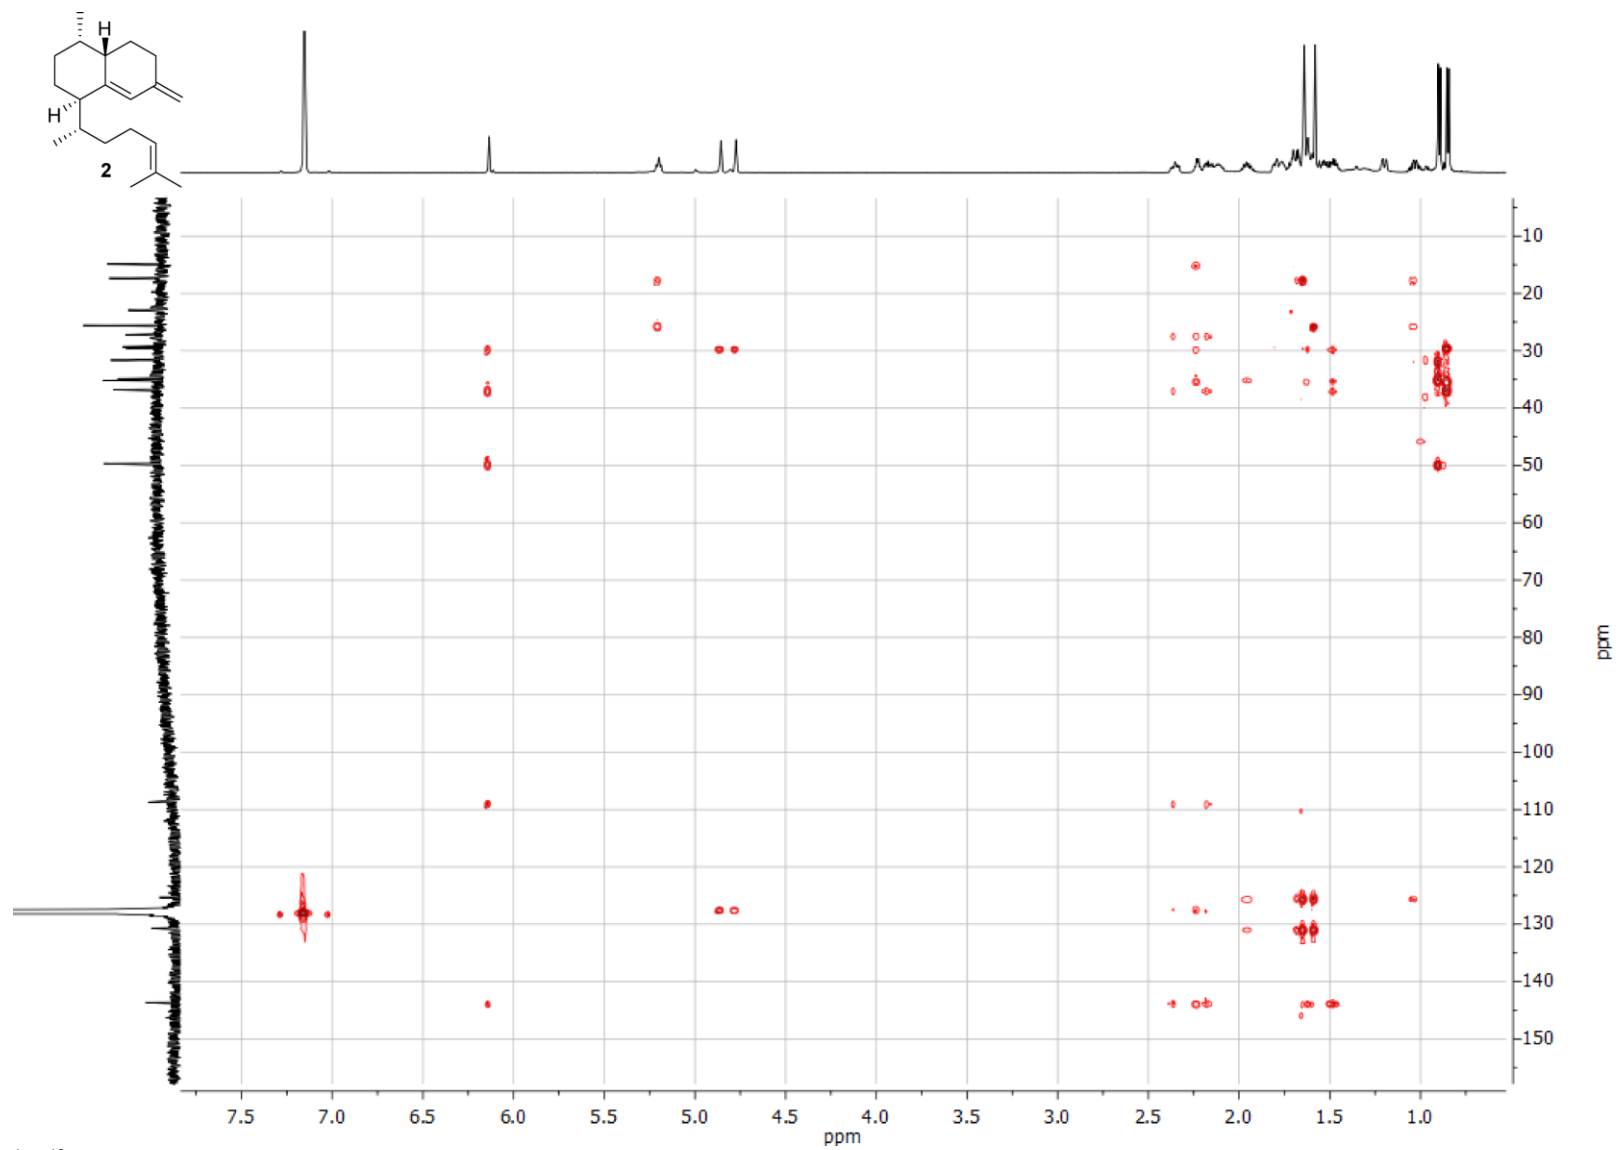

$^1\text{H}$ ,  $^{13}\text{C}$  HMBC spectrum (600 MHz) of **2**



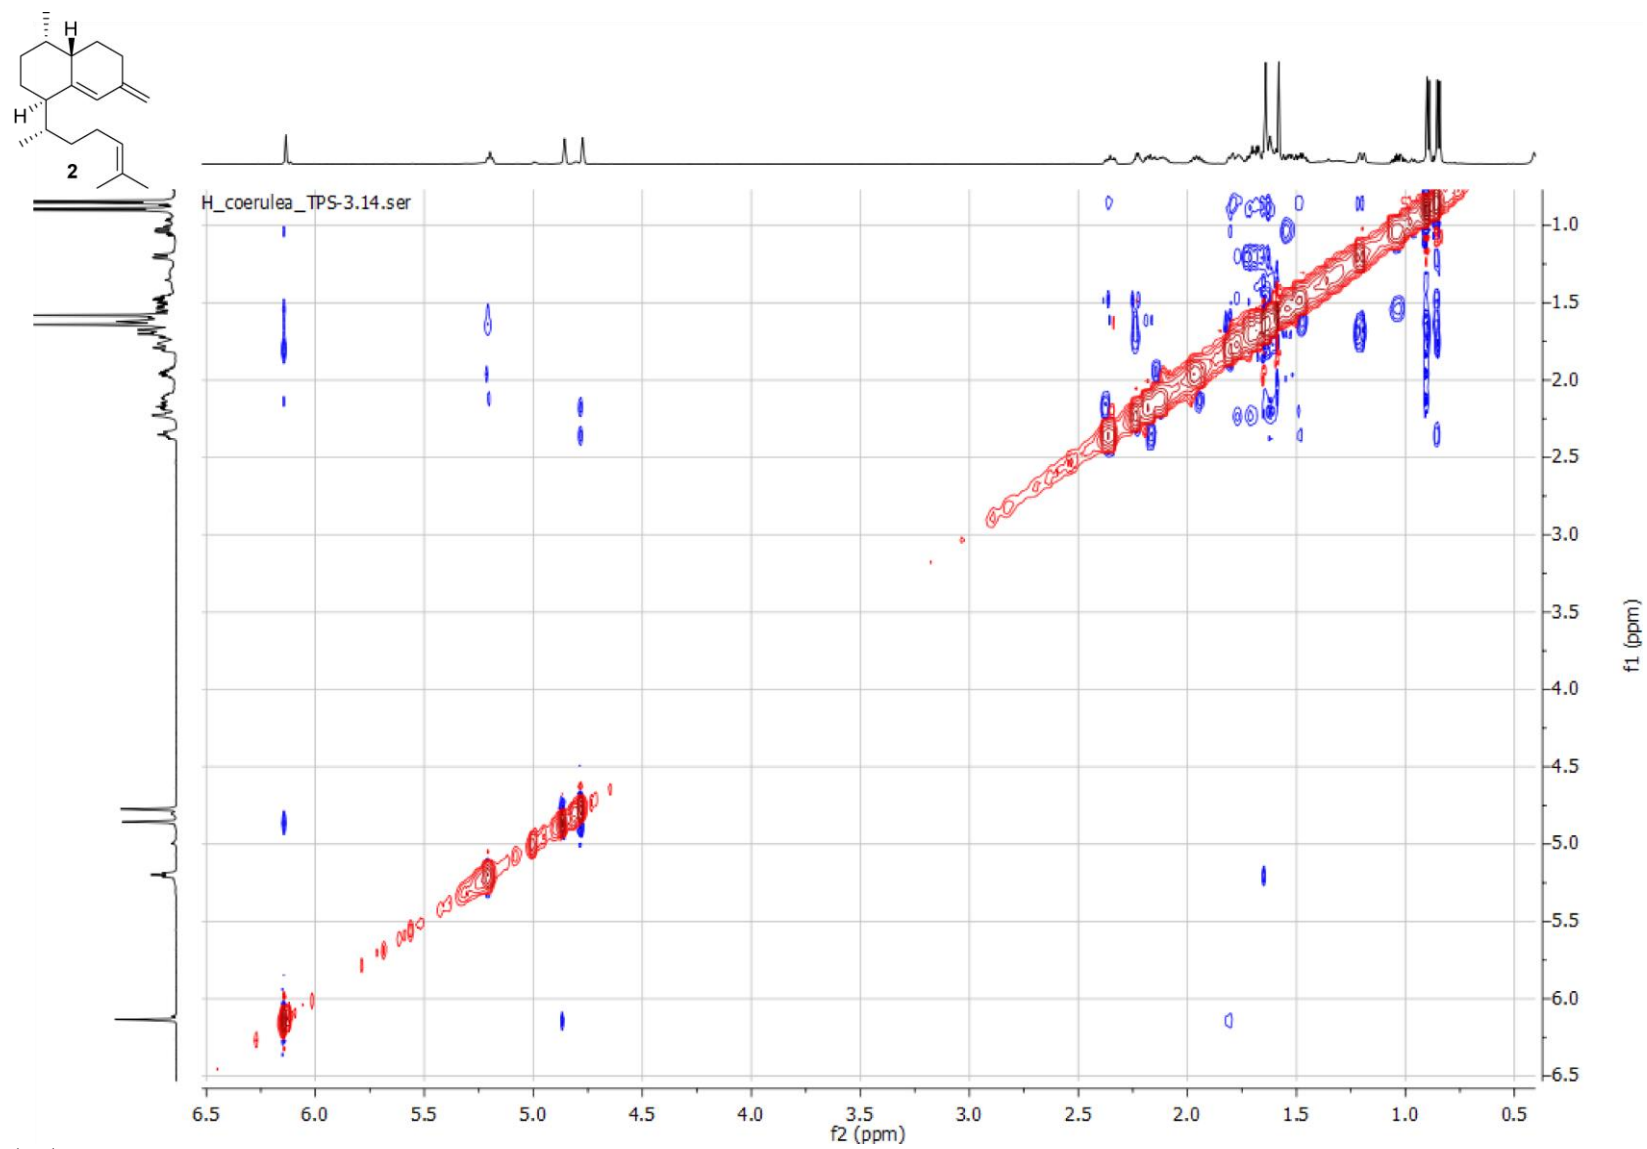

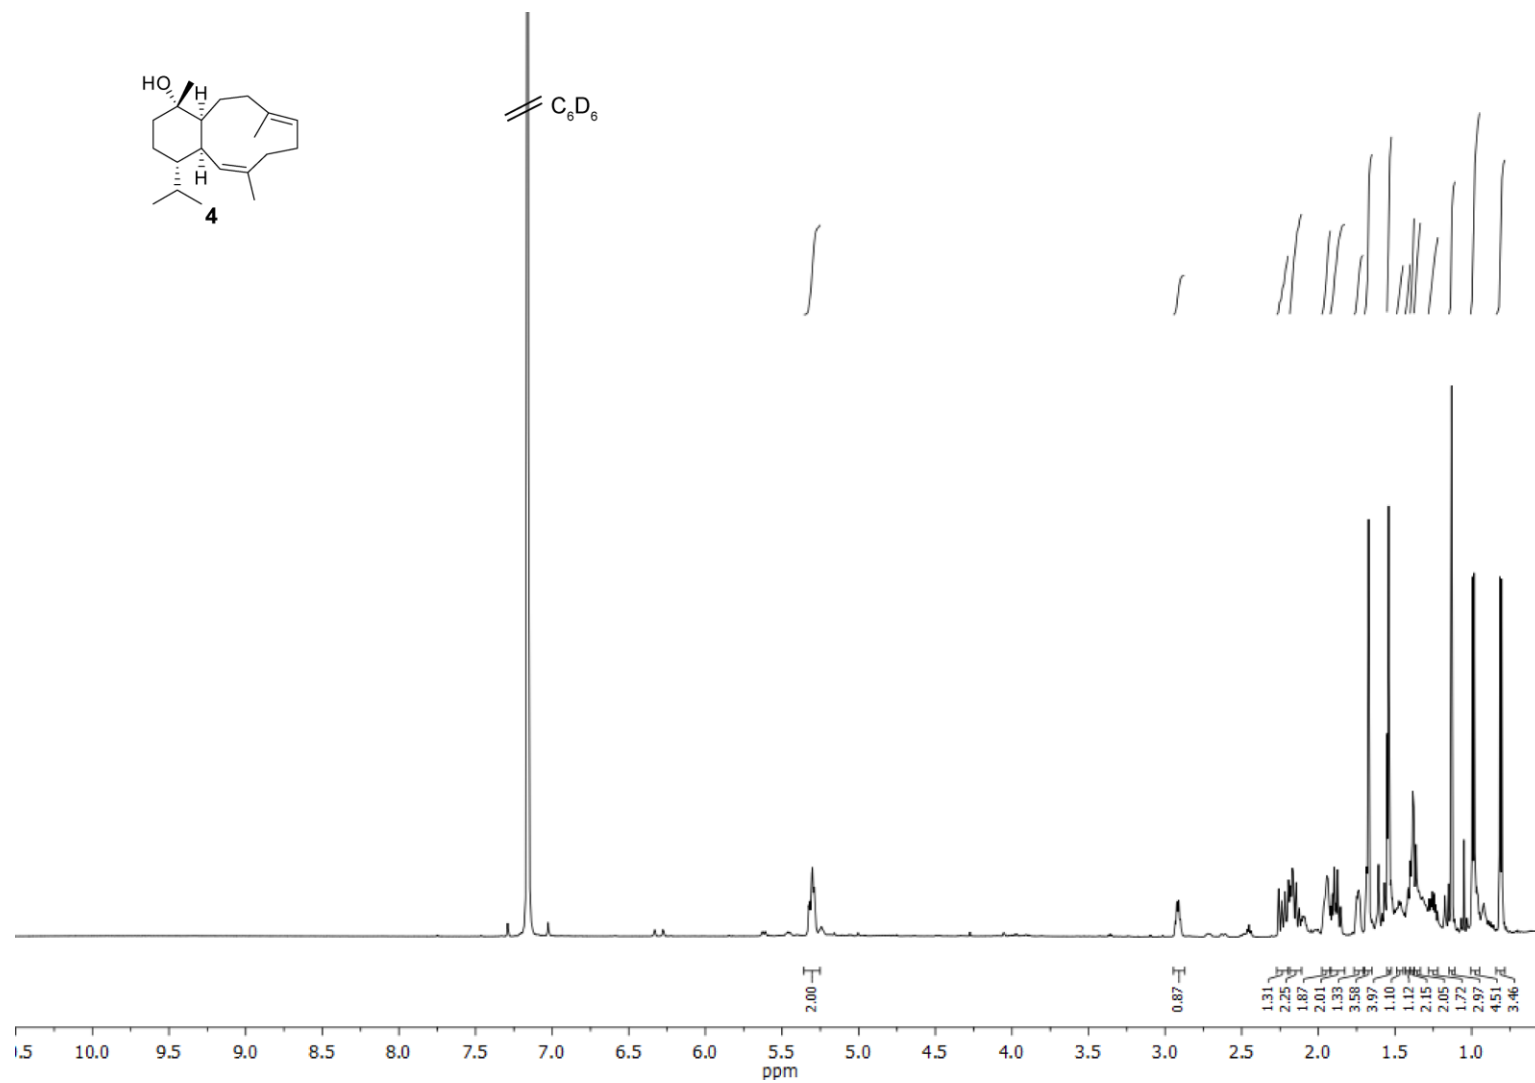

<sup>1</sup>H NMR spectrum (600 MHz) of **4**.

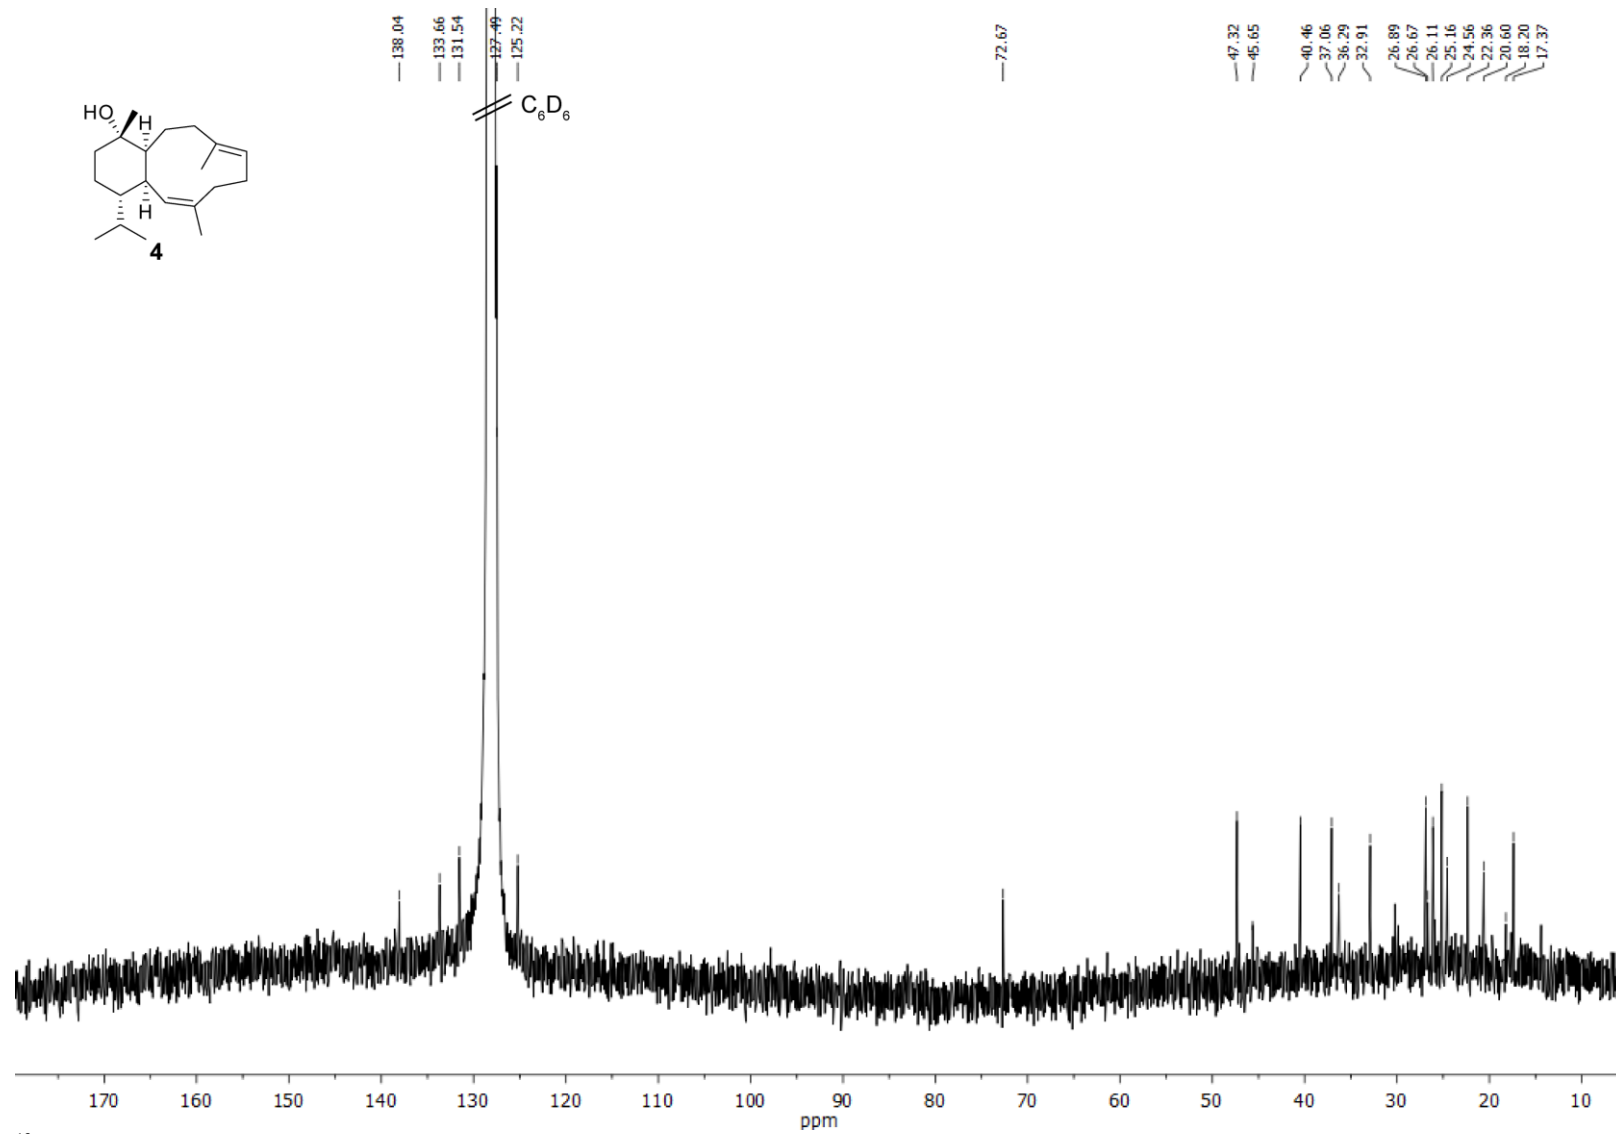

<sup>13</sup>C NMR spectrum (125 MHz) of **4**.

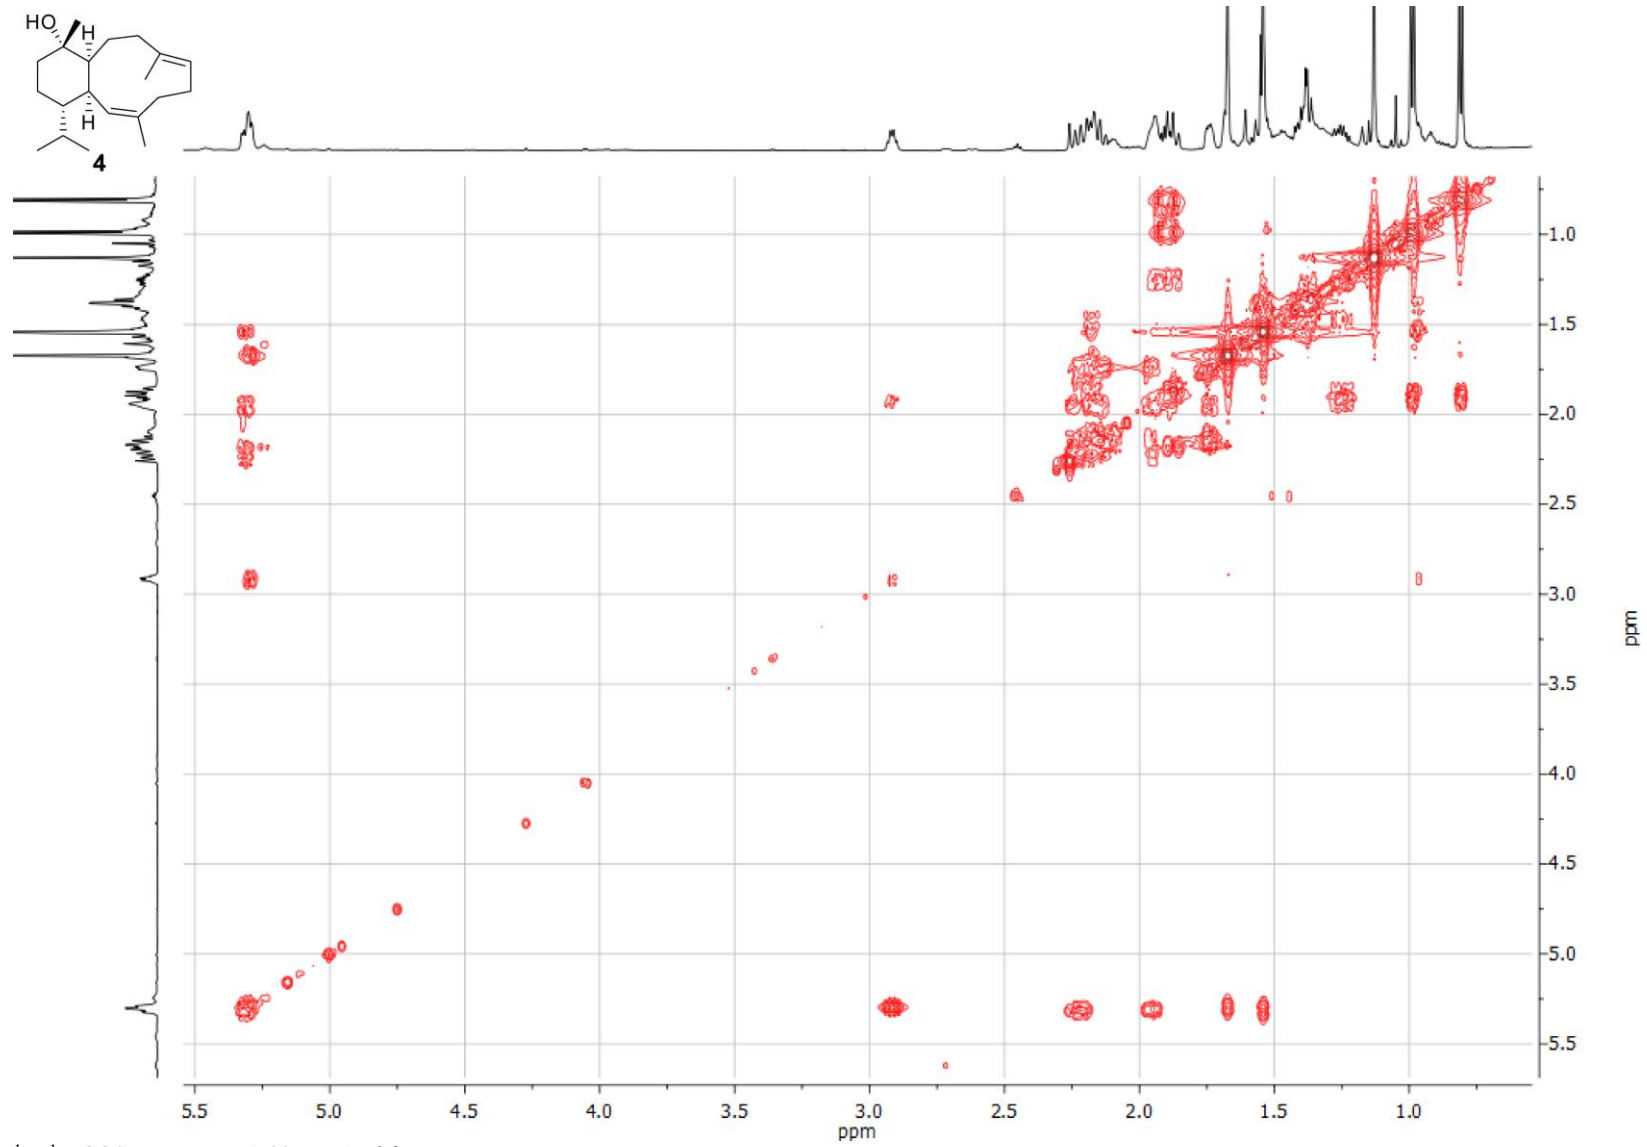

$^1\text{H}$ ,  $^1\text{H}$  COSY spectrum (600 MHz) of **4**.

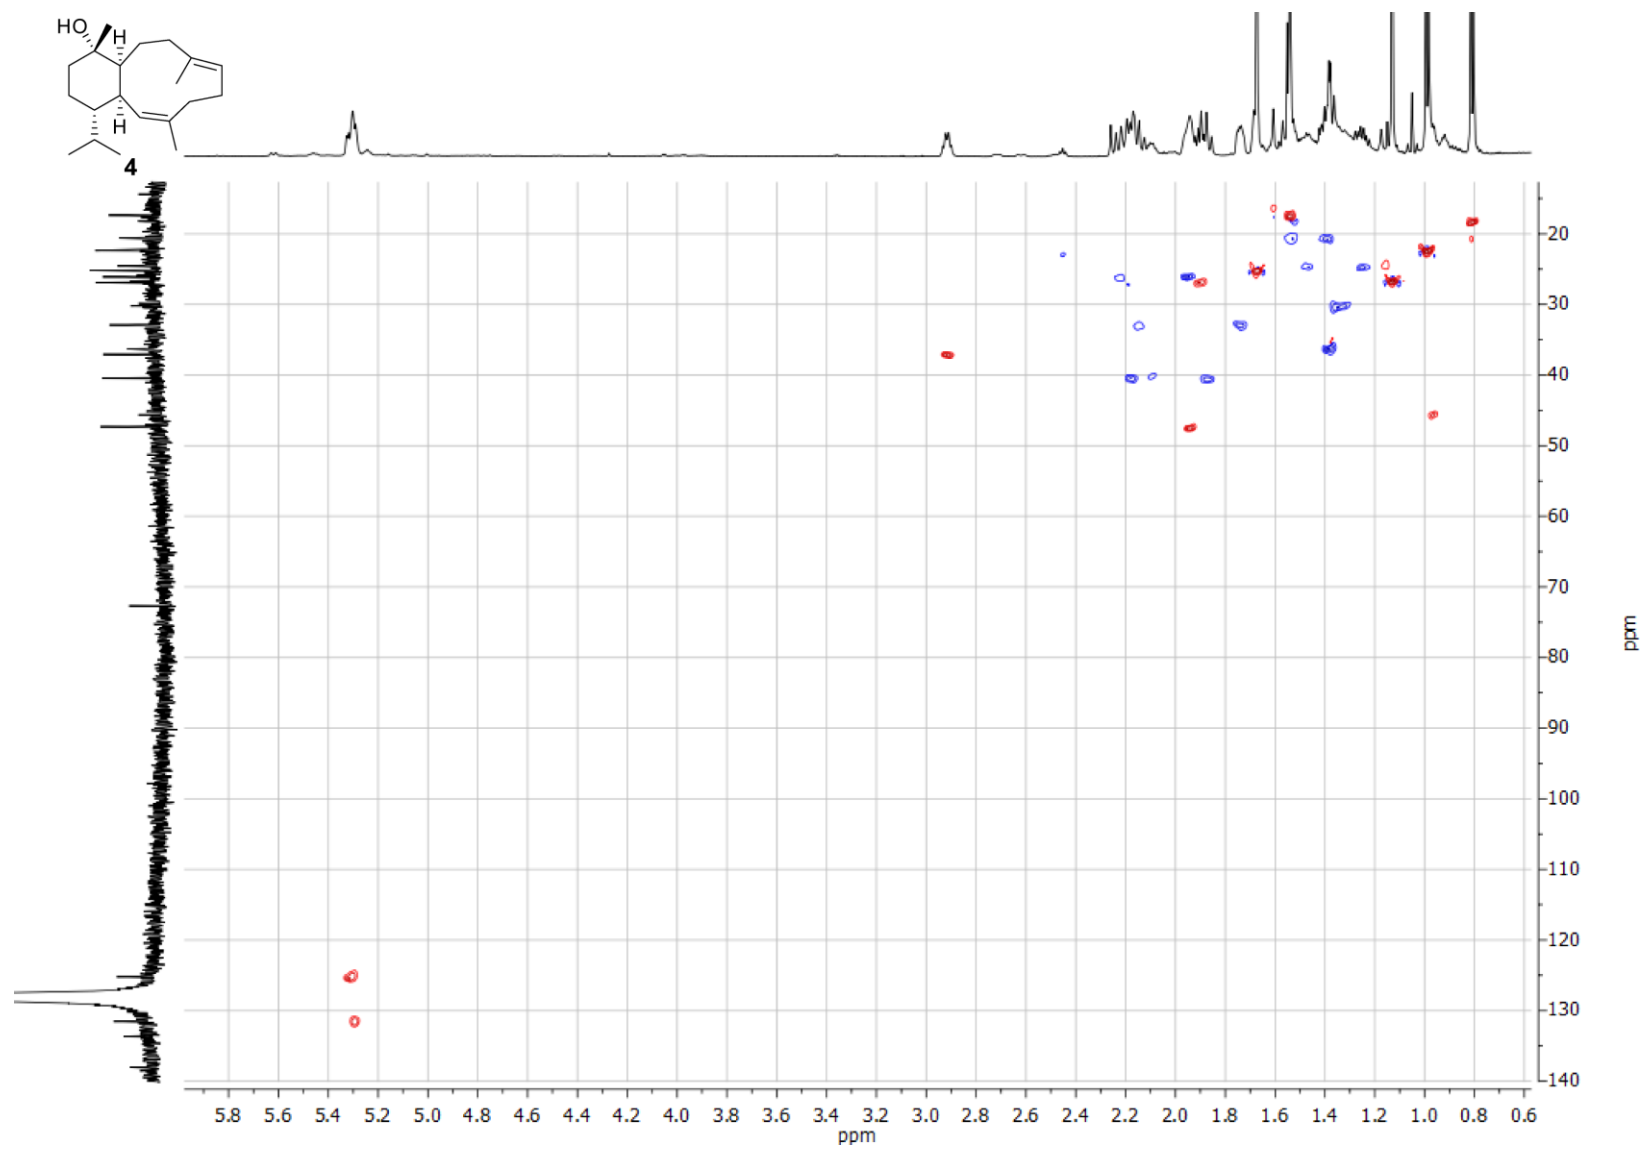

$^1\text{H}$ ,  $^{13}\text{C}$  HSQC spectrum (600 MHz) of 4.

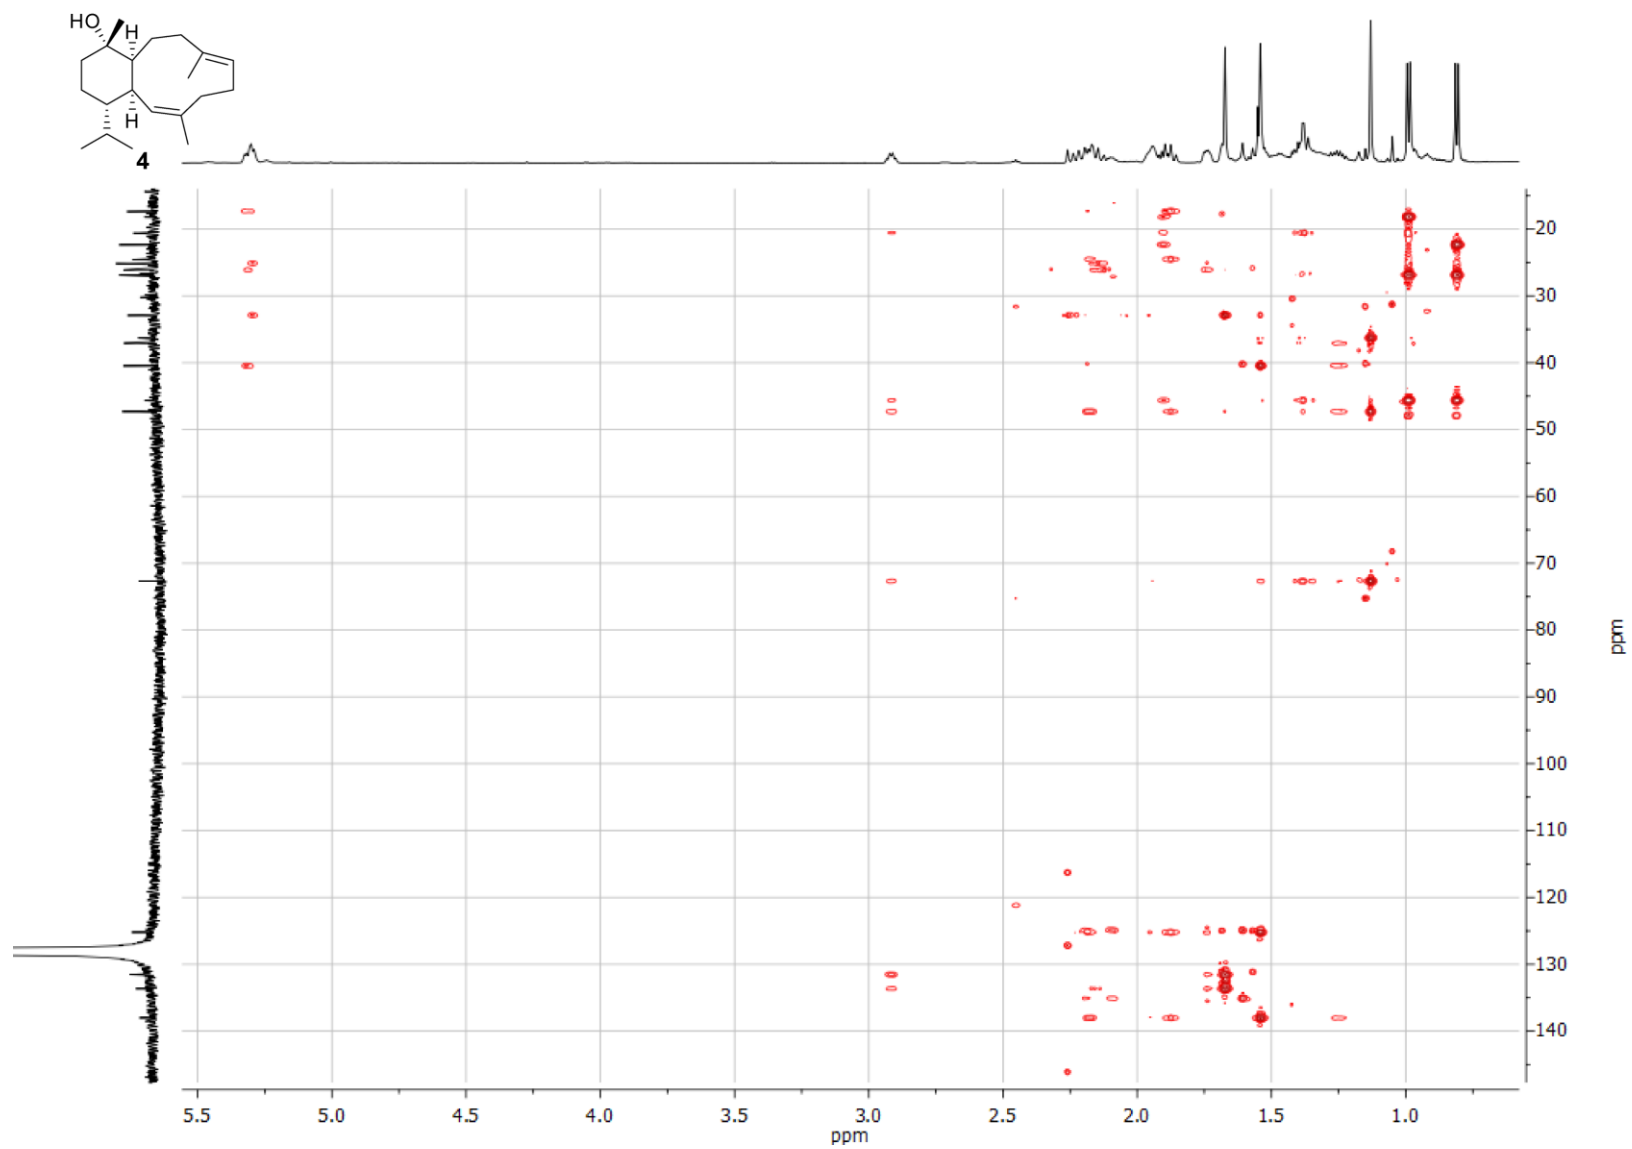

$^1\text{H}$ ,  $^{13}\text{C}$  HMBC spectrum (600 MHz) of **4**.

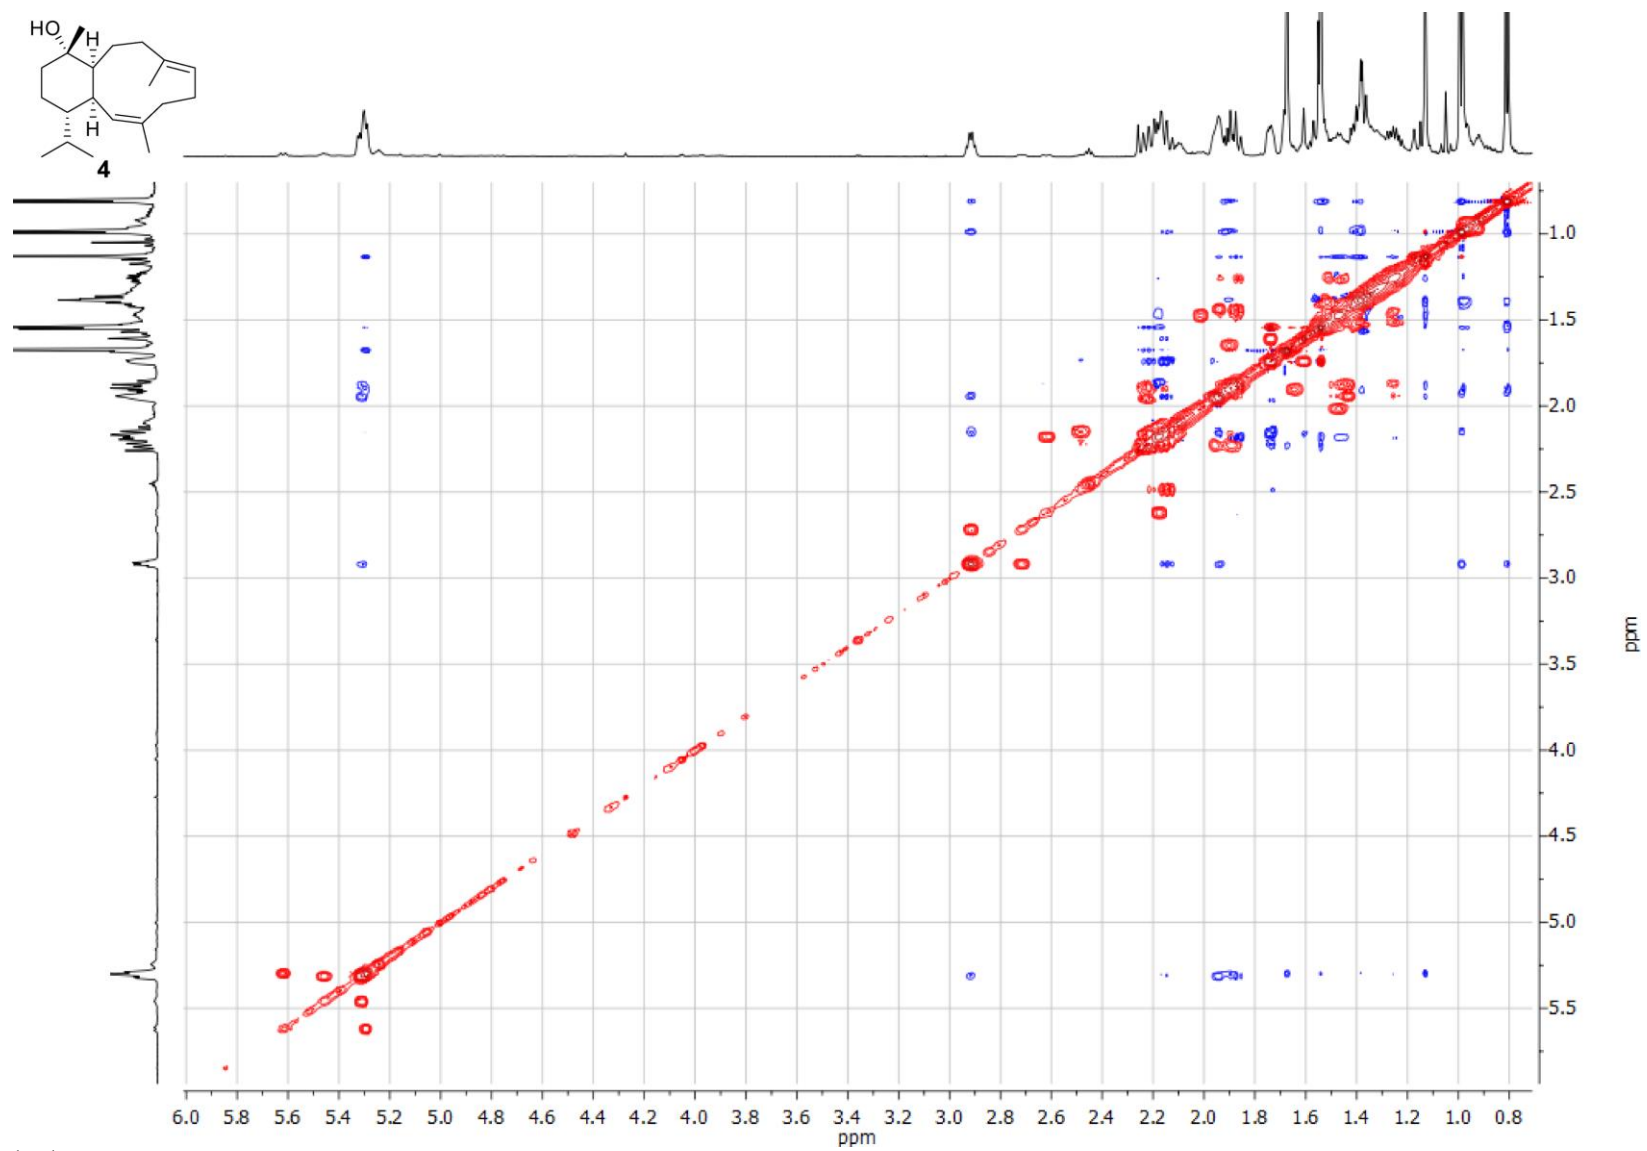

$^1\text{H}$ ,  $^1\text{H}$  NOESY spectrum (600 MHz) of **4**.





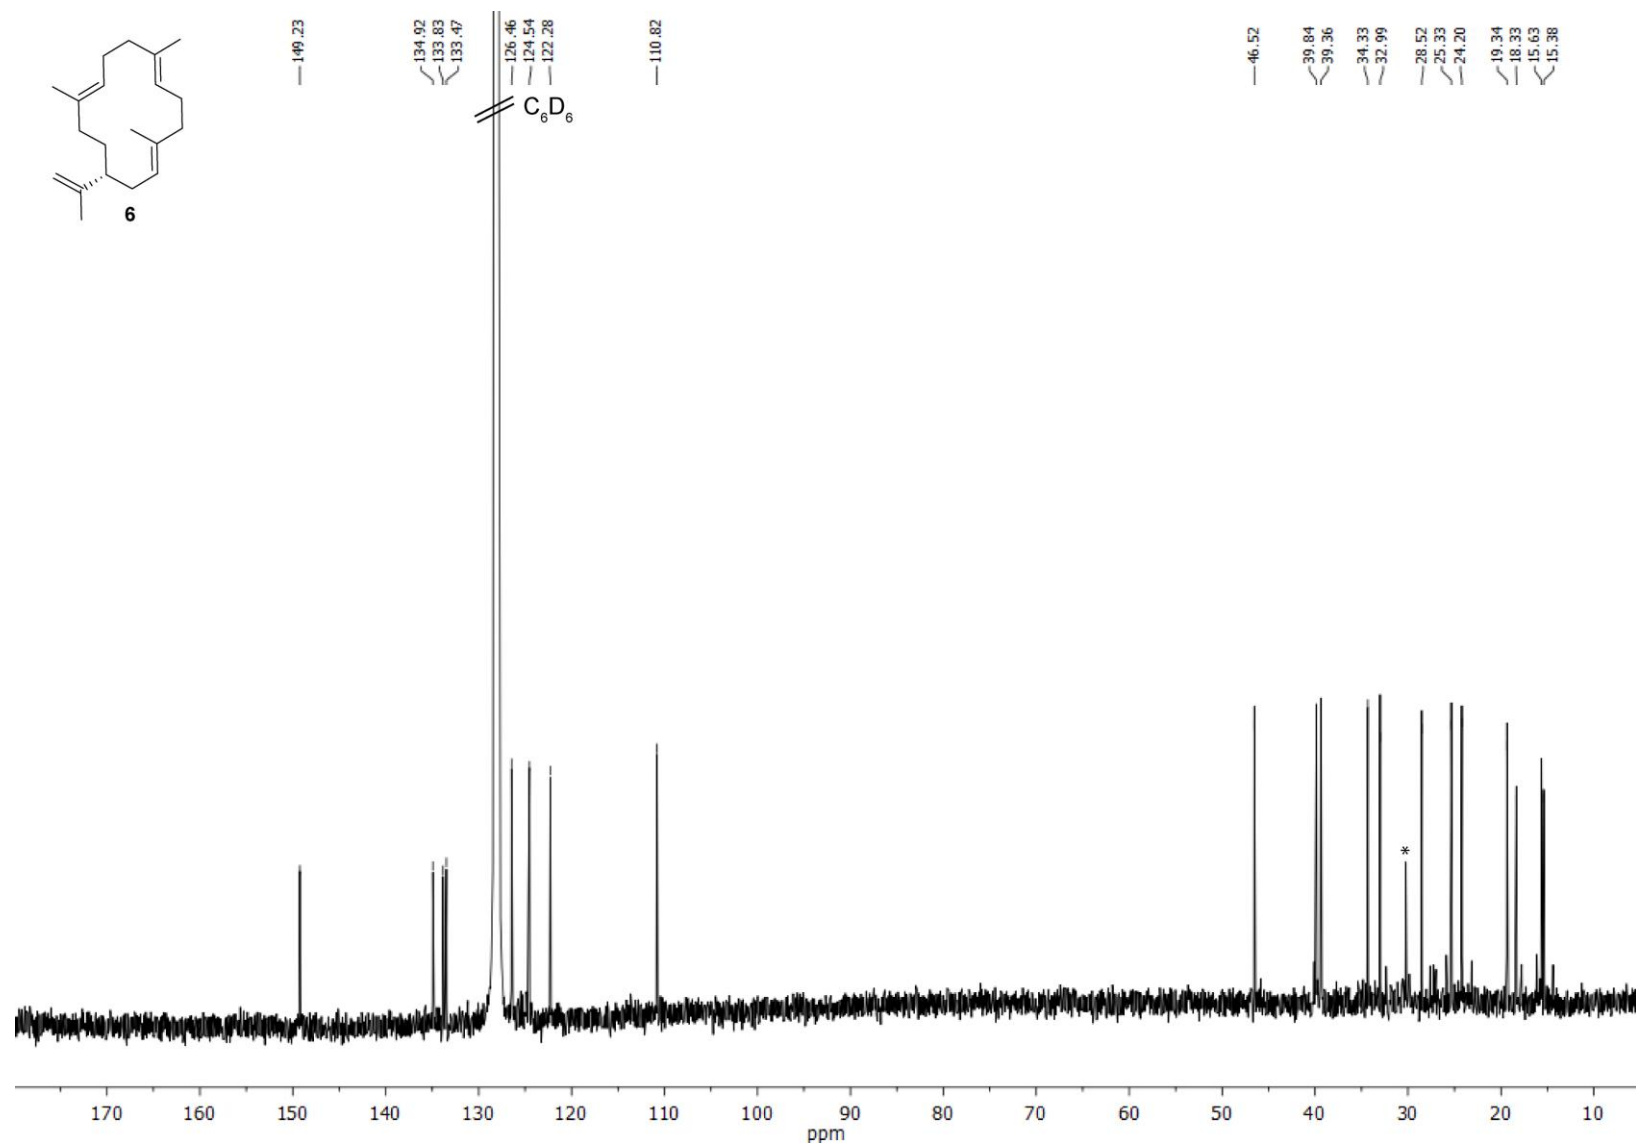

$^{13}\text{C}$  NMR spectrum (125 MHz) of **6**.

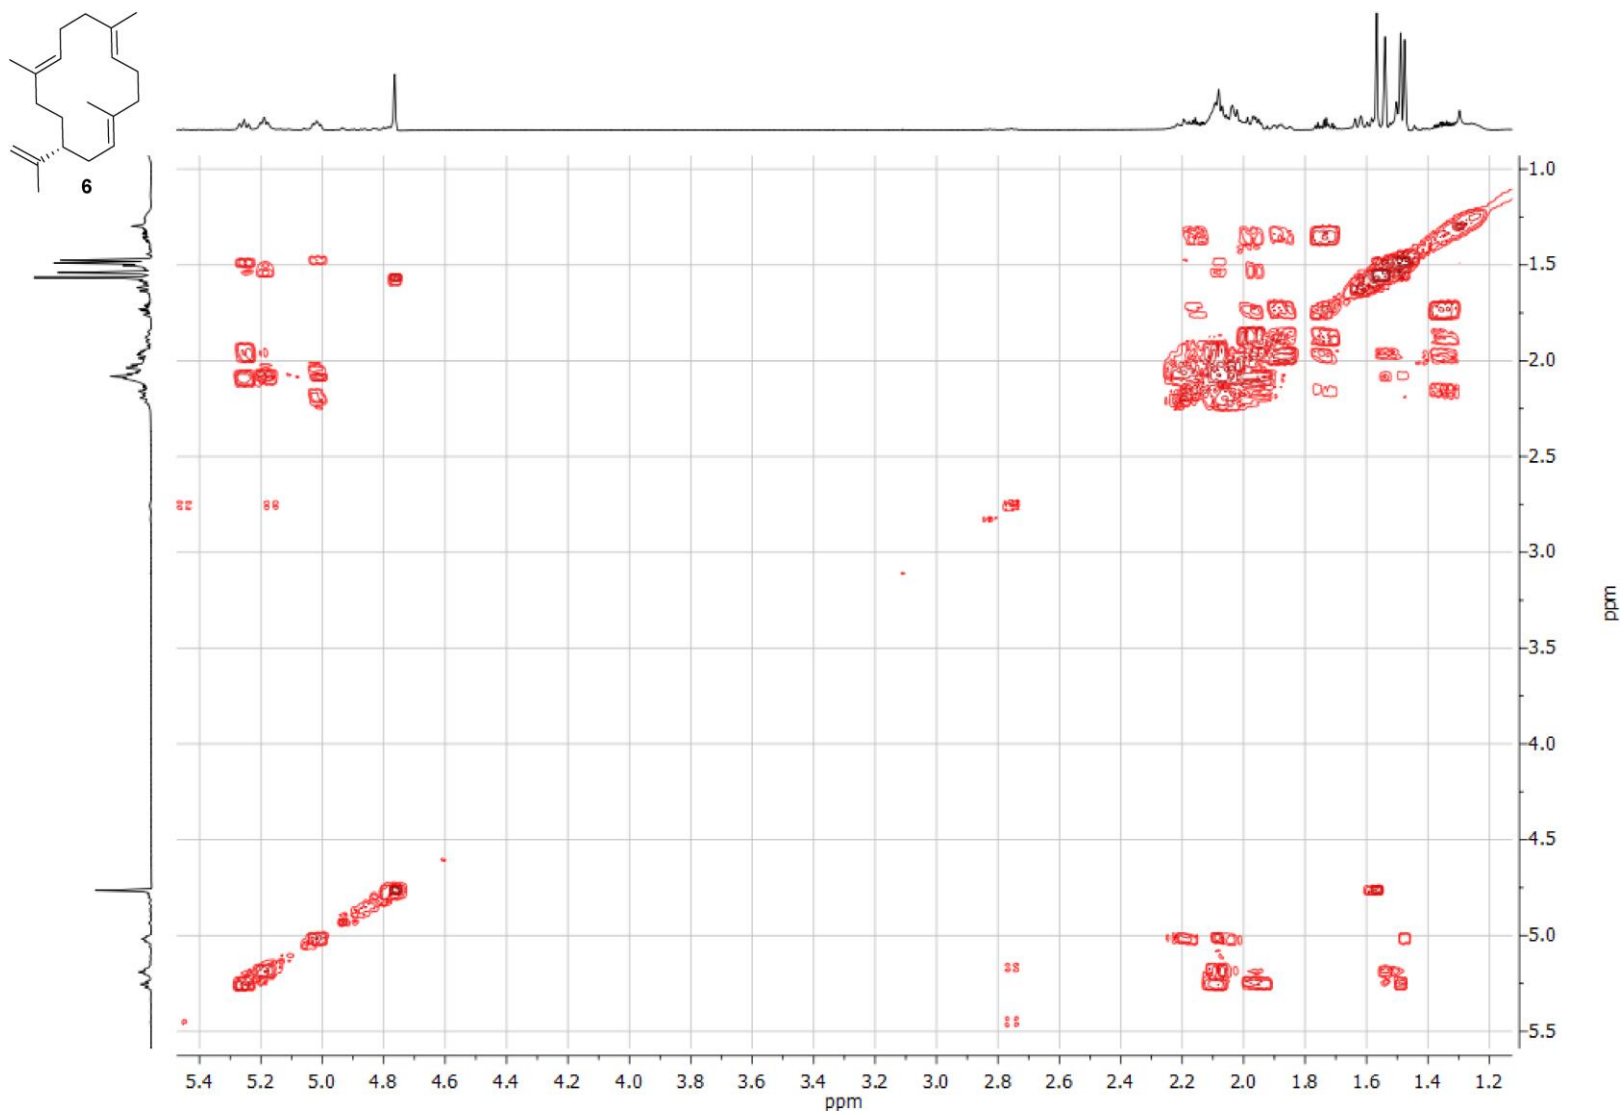

$^1\text{H}$ ,  $^1\text{H}$  COSY spectrum (500 MHz) of 6.

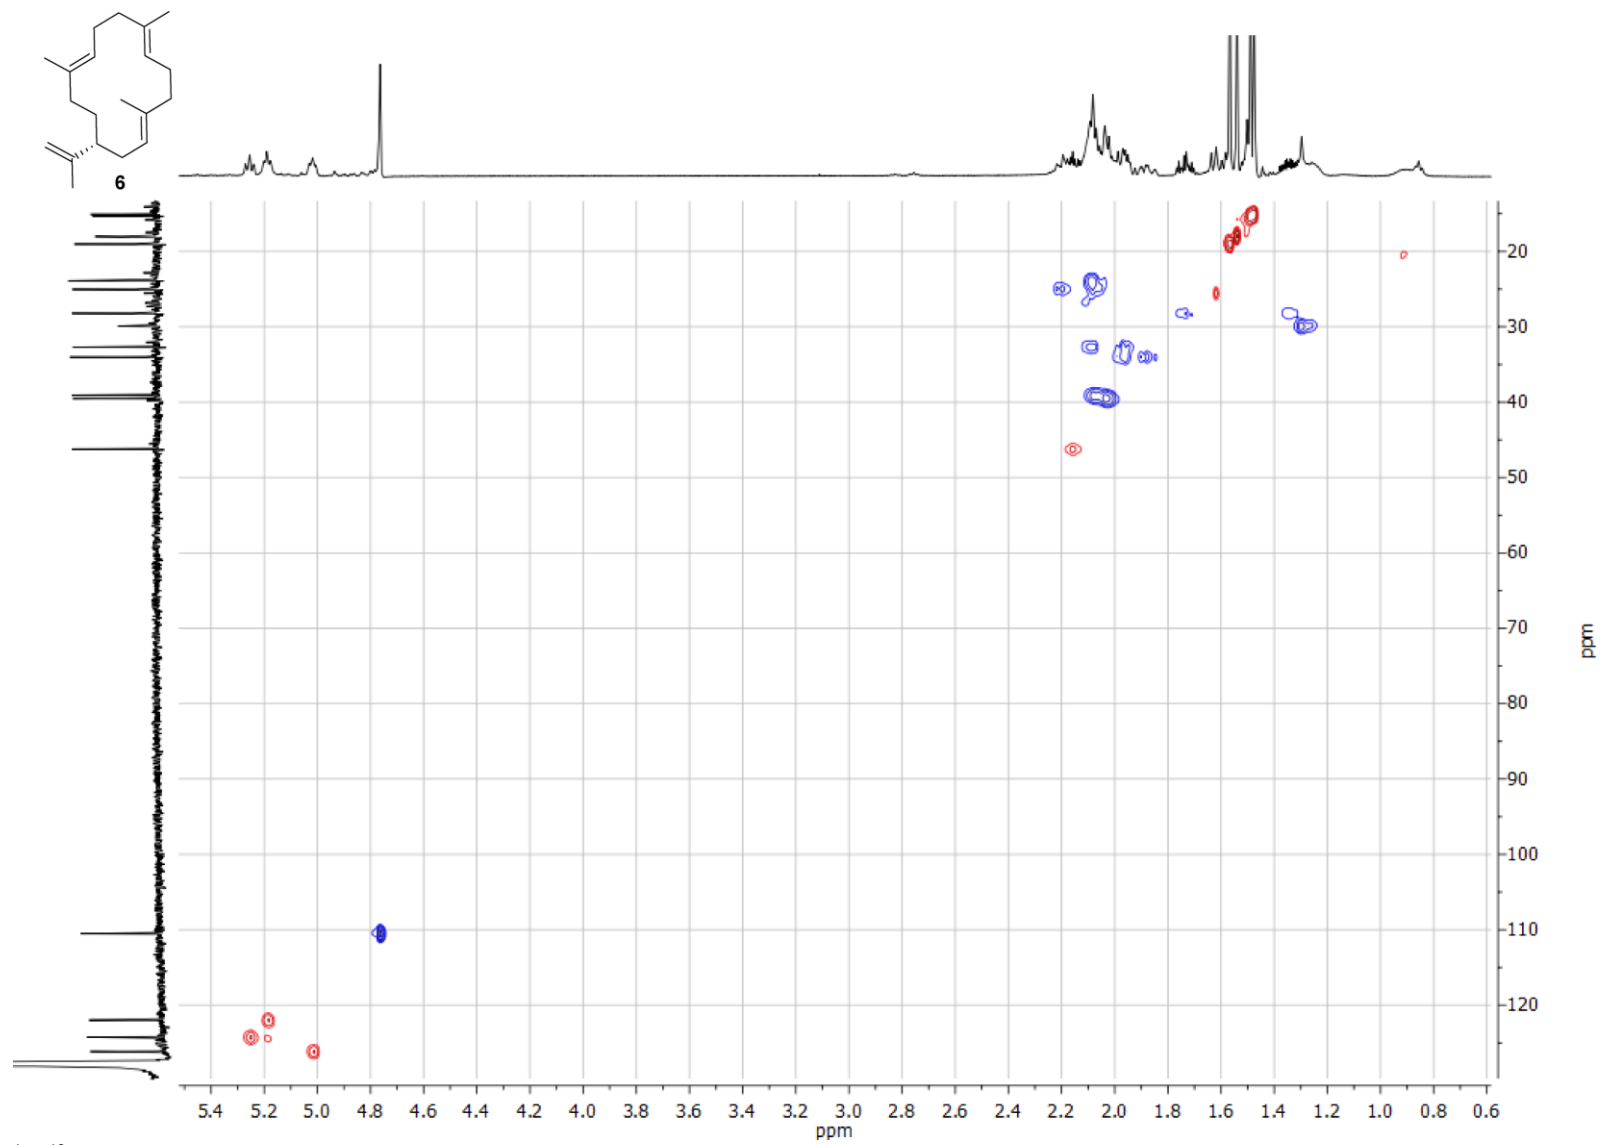

$^1\text{H}$ ,  $^{13}\text{C}$  HSQC spectrum (500 MHz) of **6**.

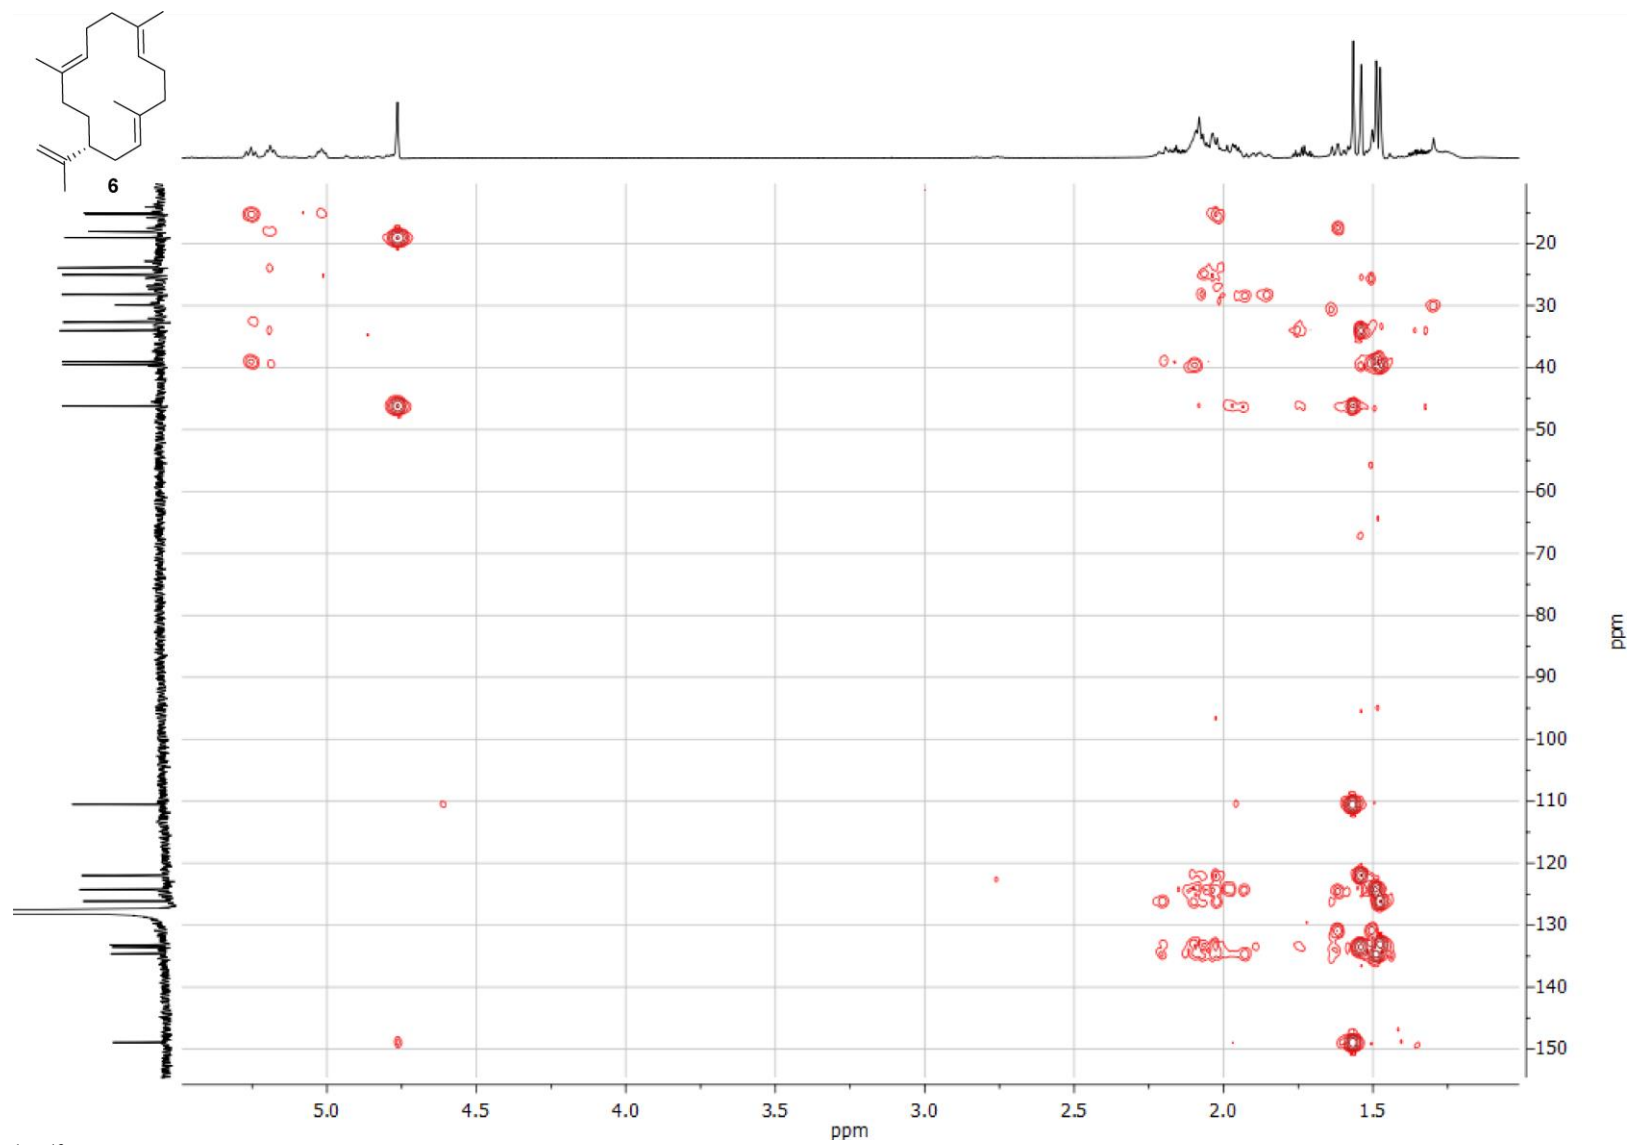

$^1\text{H}$ ,  $^{13}\text{C}$  HMBC spectrum (500 MHz) of **6**.

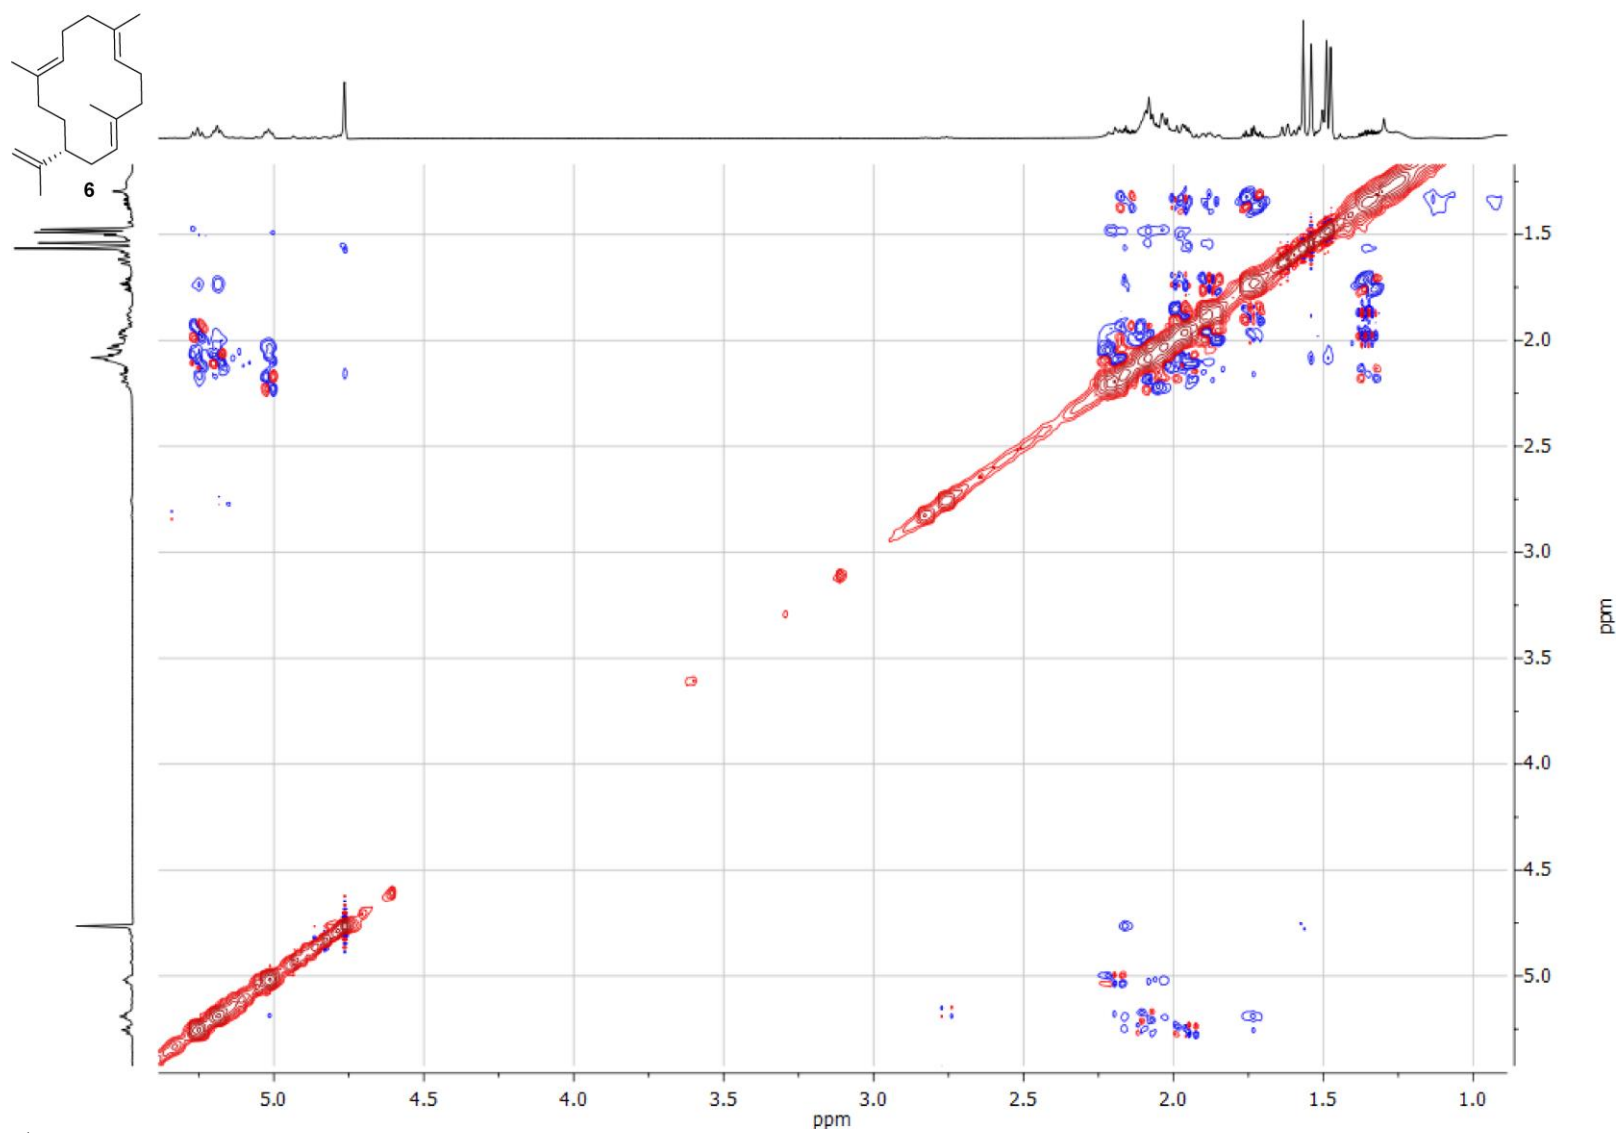

$^1\text{H}$ ,  $^1\text{H}$  NOESY spectrum (600 MHz) of **6**.

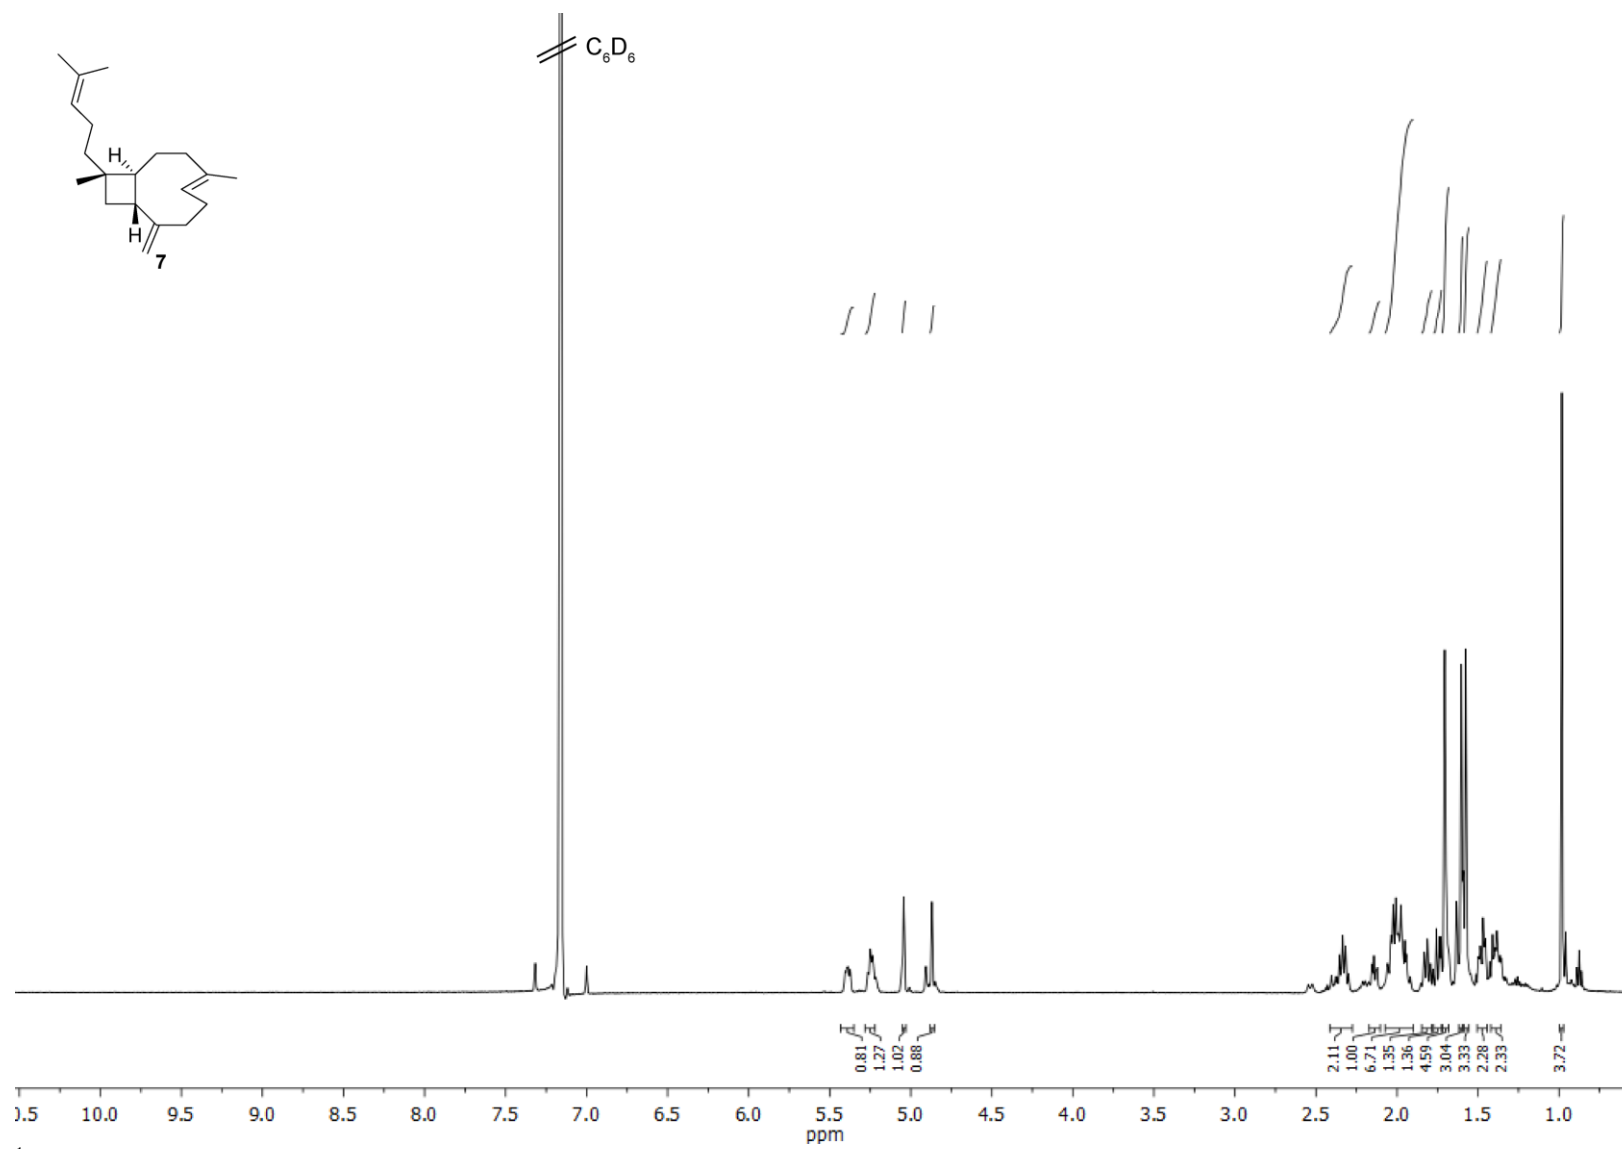

$^1H$  NMR spectrum (600 MHz) of 7.

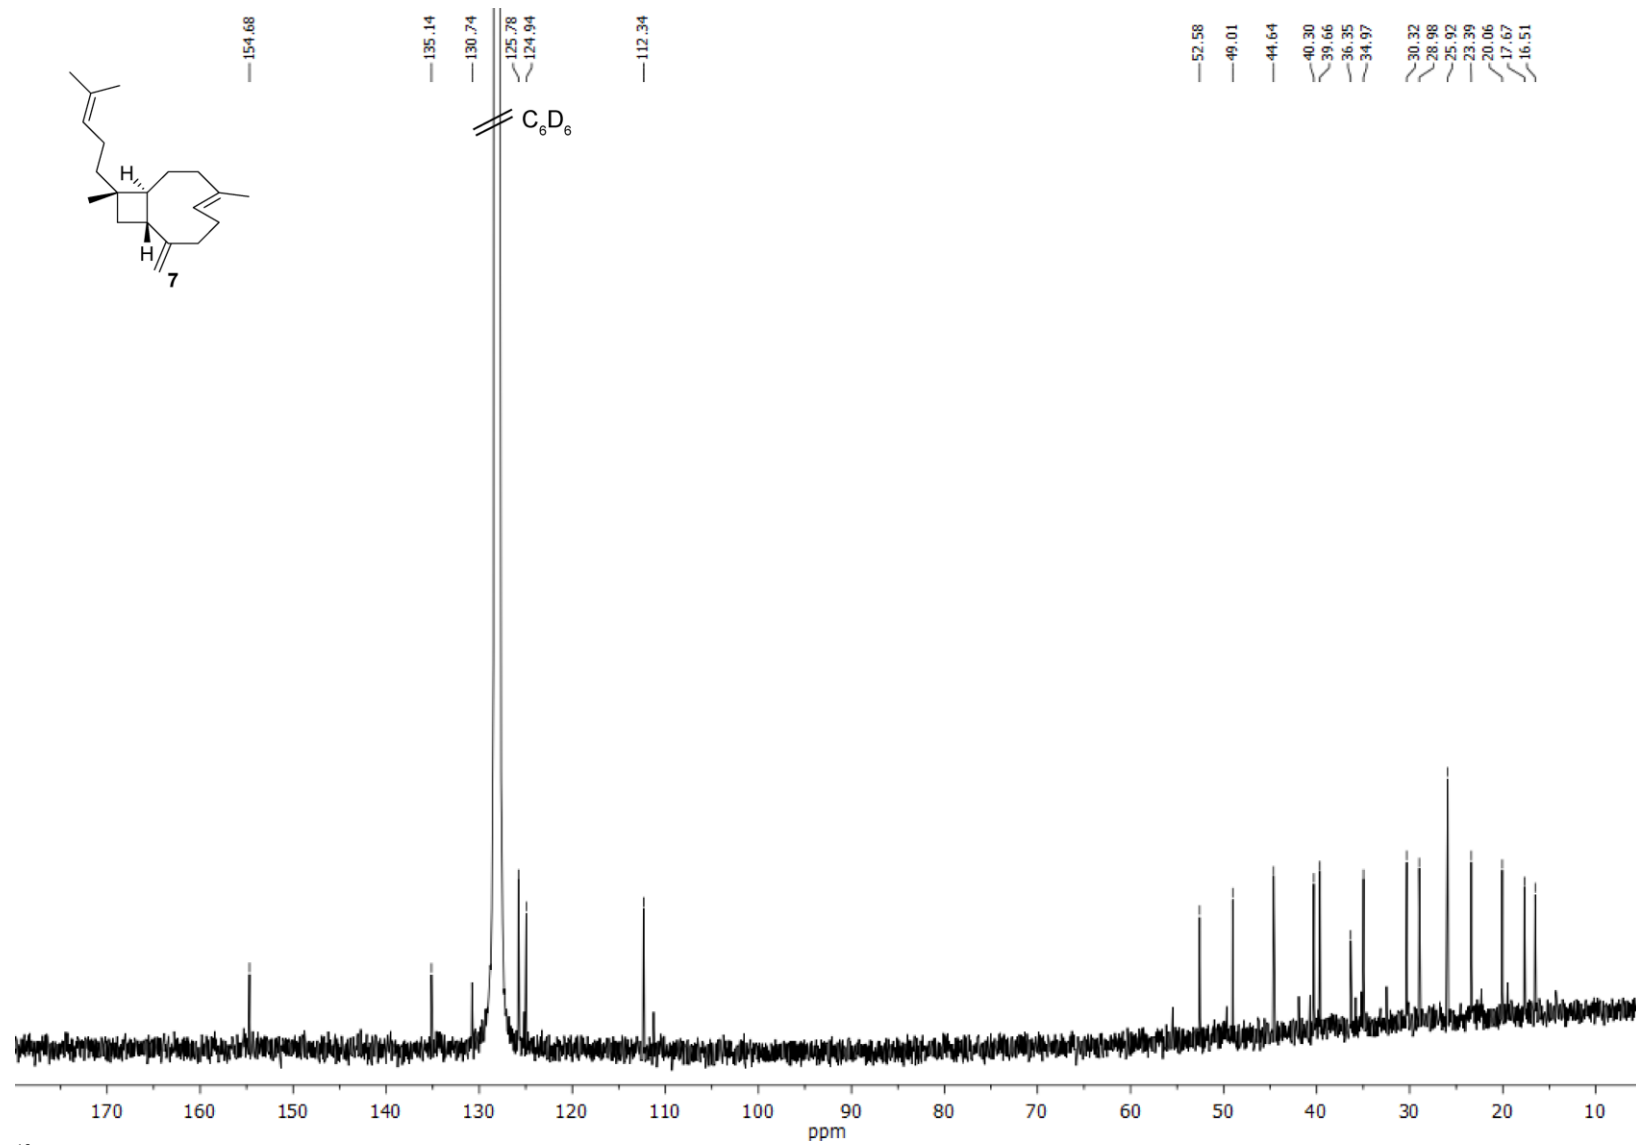

$^{13}\text{C}$  NMR spectrum (125 MHz) of 7.

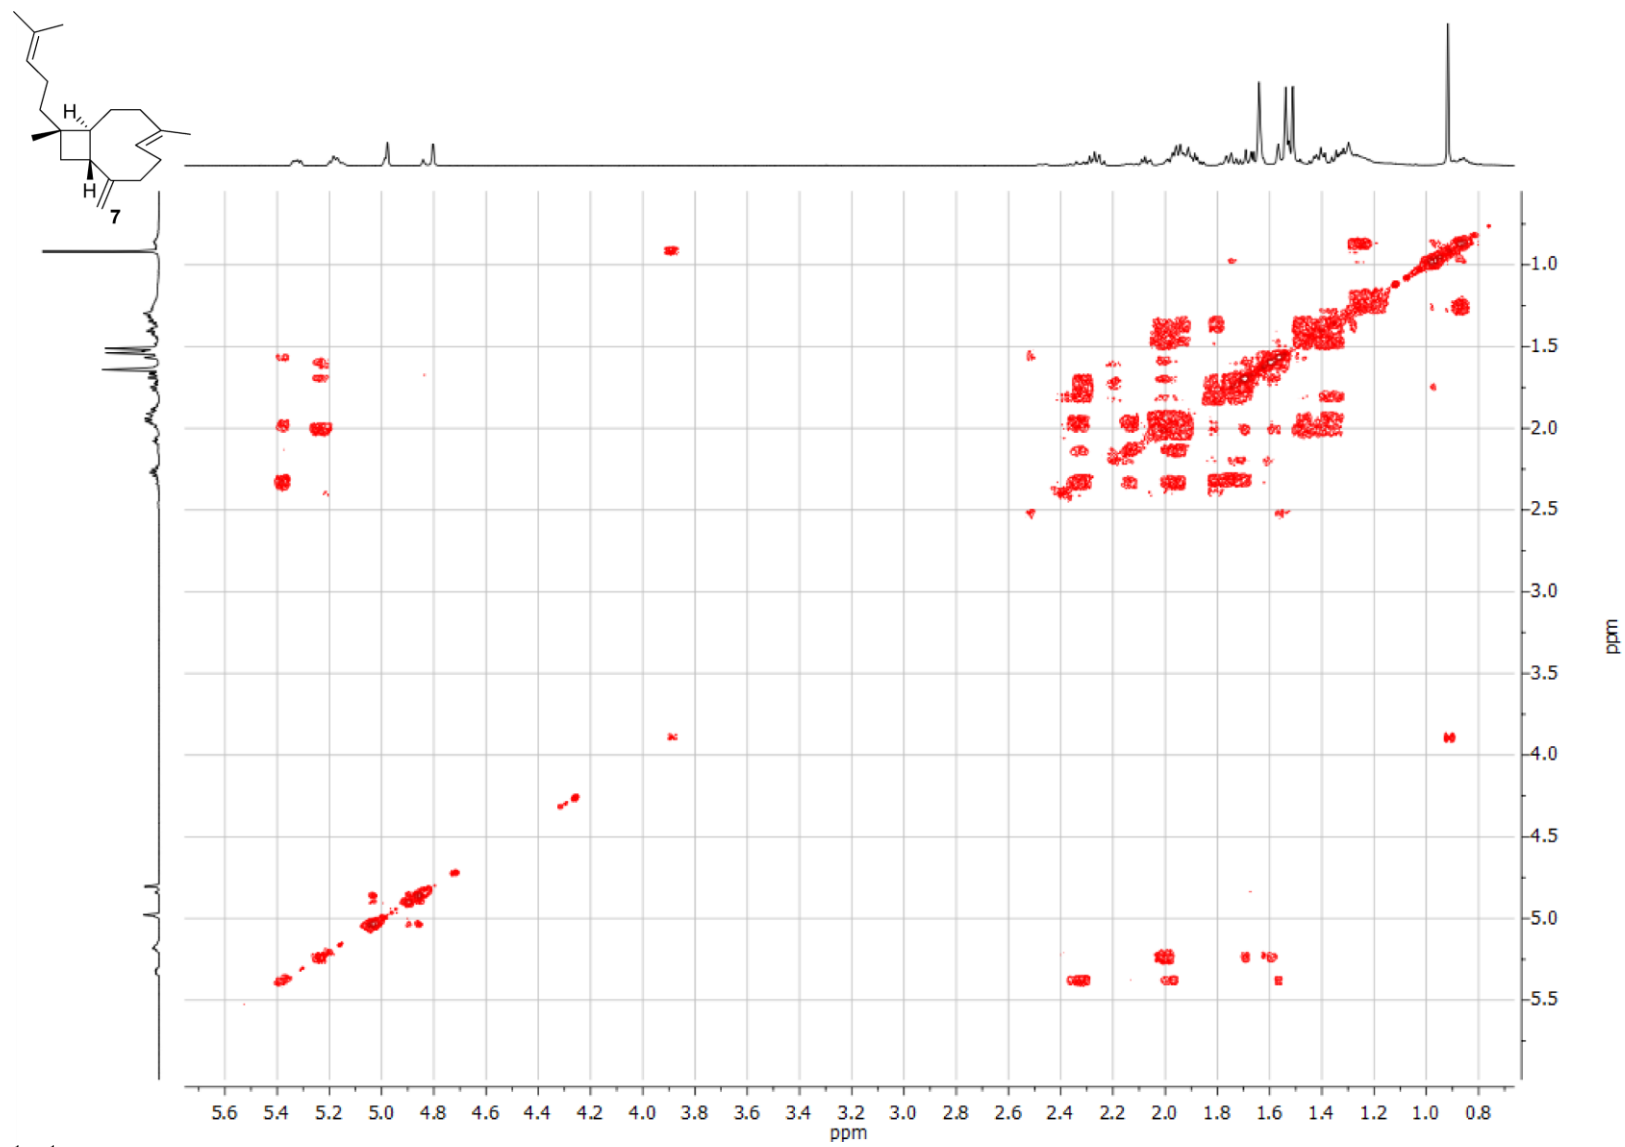

$^1\text{H}$ ,  $^1\text{H}$  COSY spectrum (600 MHz) of 7.



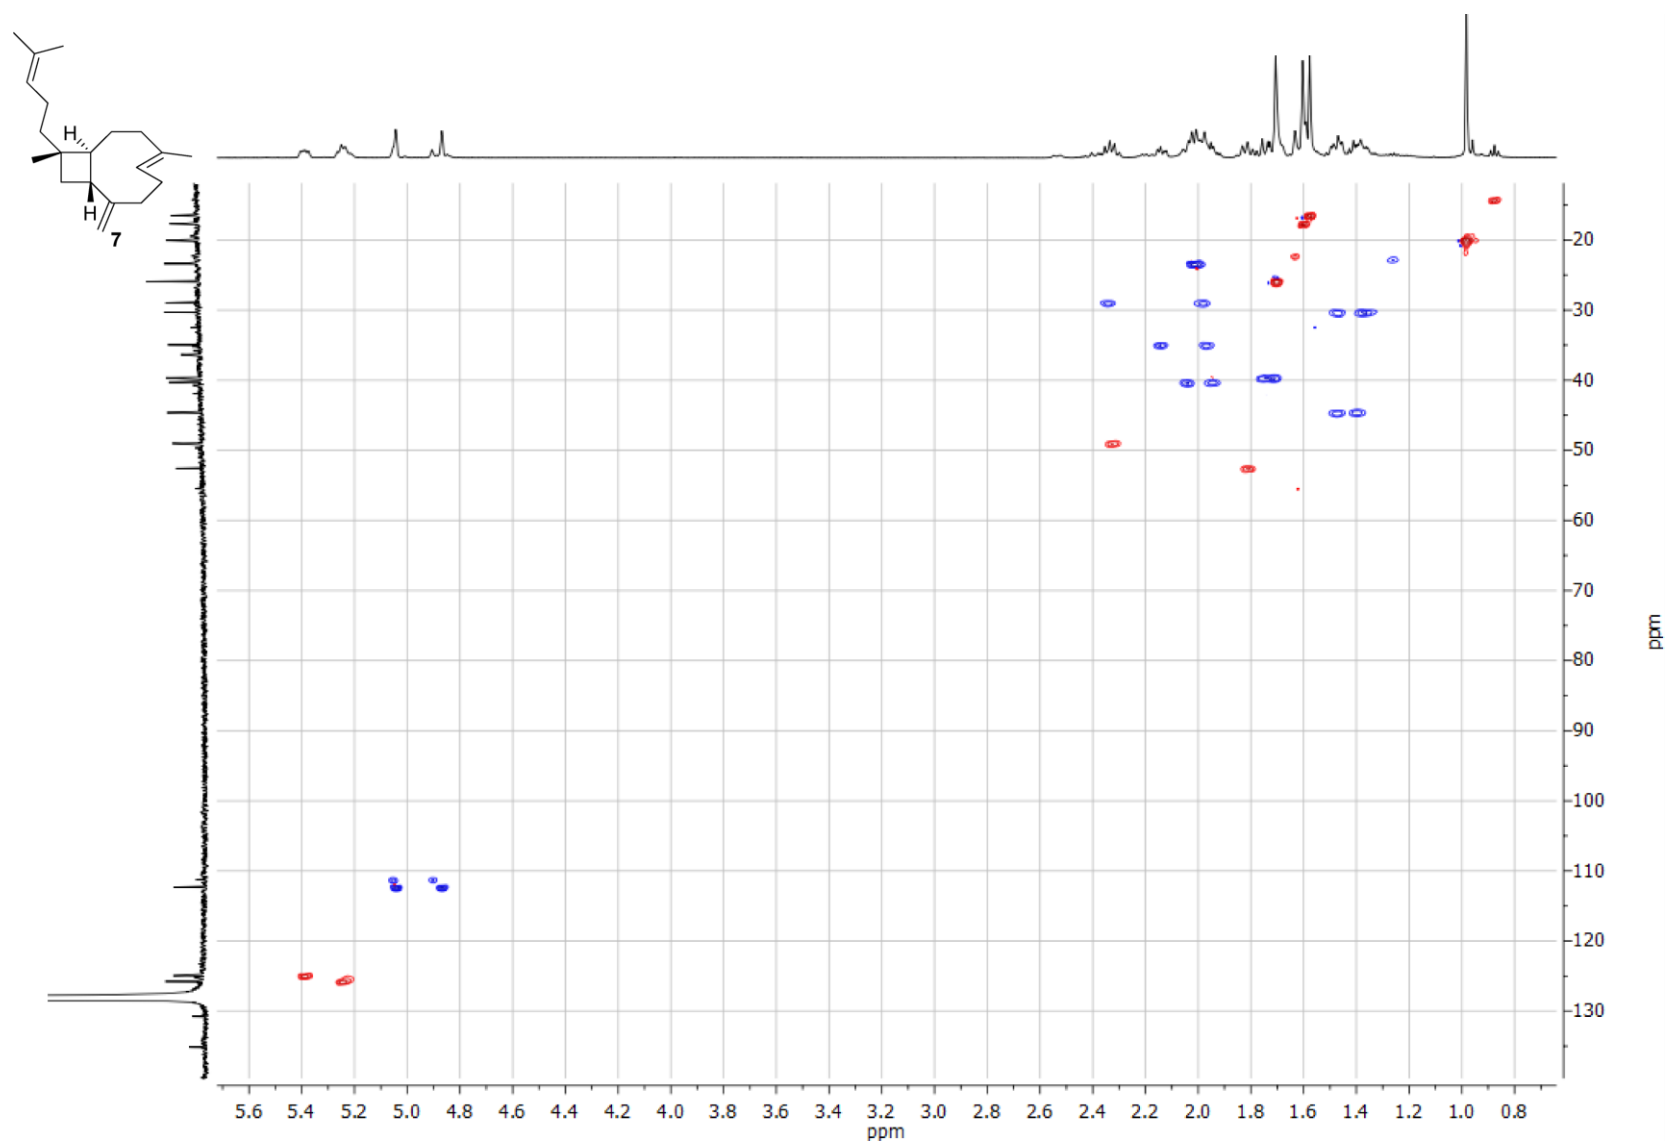

$^1\text{H}$ ,  $^{13}\text{C}$  HSQC spectrum (600 MHz) of 7.

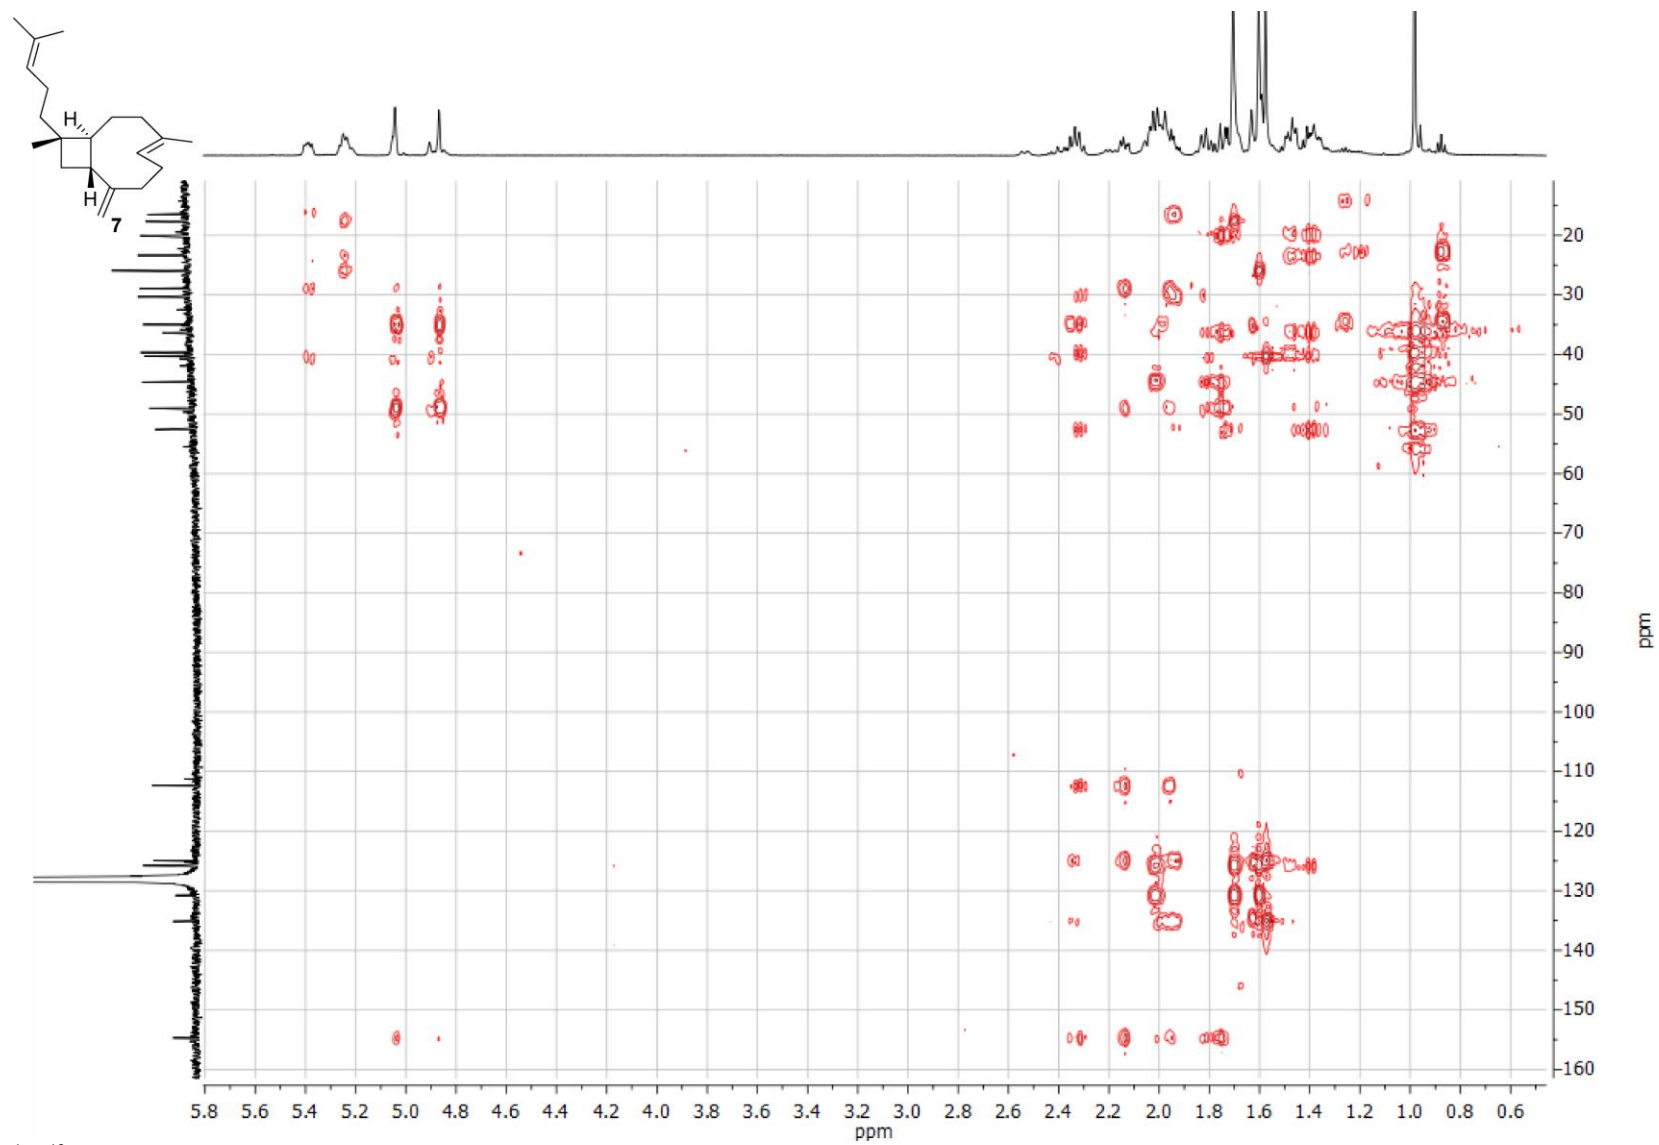

$^1\text{H}$ ,  $^{13}\text{C}$  HMBC spectrum (600 MHz) of 7.

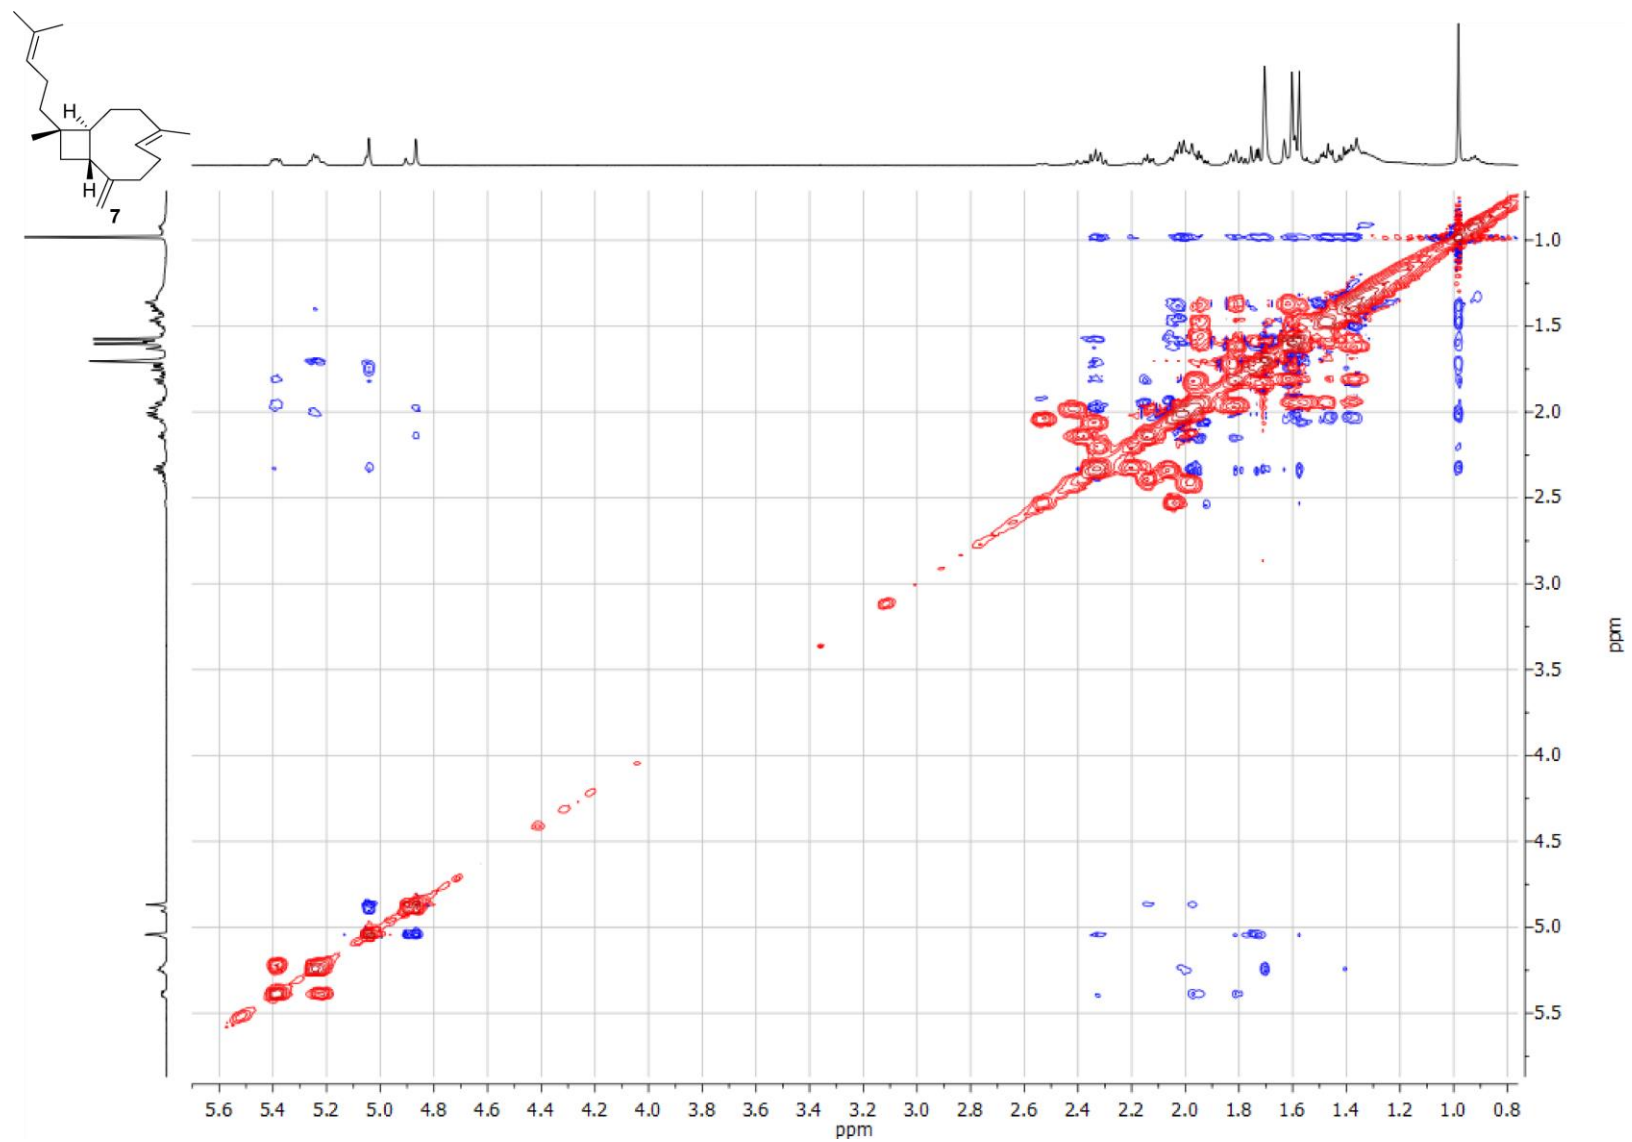

$^1\text{H}$ ,  $^1\text{H}$  NOESY spectrum (500 MHz) of 7.

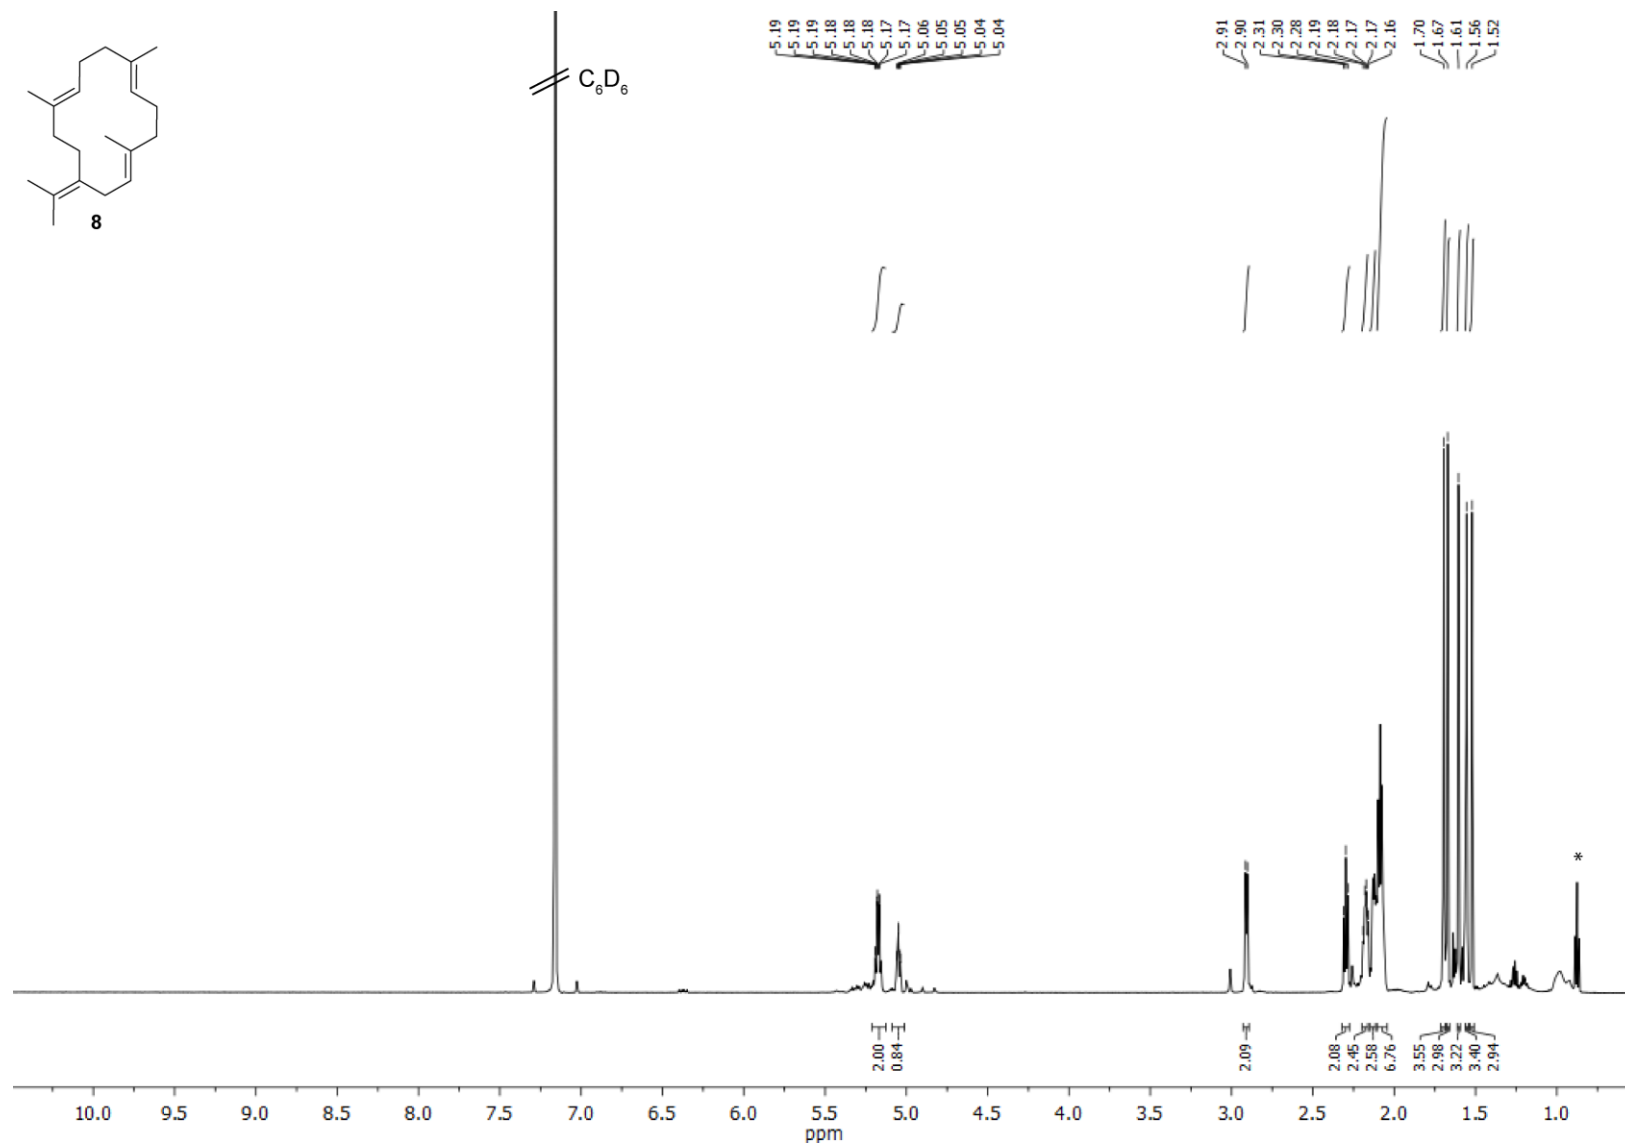

$^1\text{H}$  NMR spectrum (600 MHz) of **8**. Asterisk denotes residual pentanes.



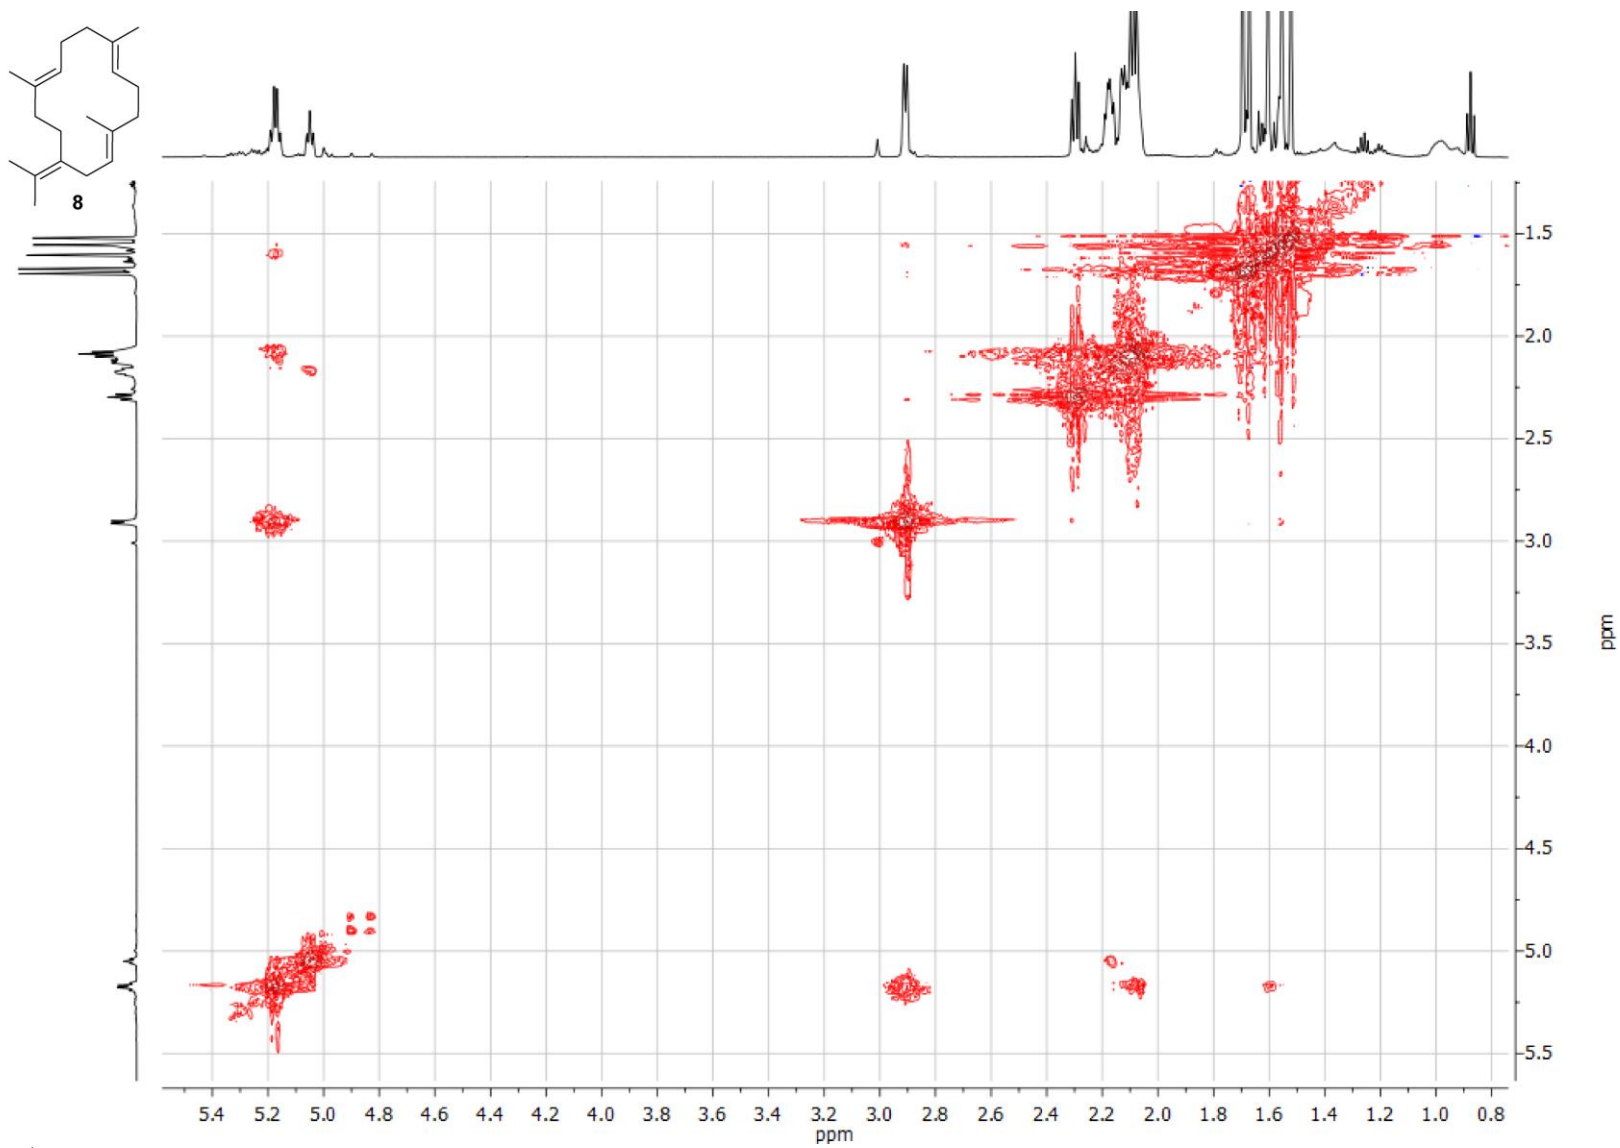

$^1\text{H}$ ,  $^1\text{H}$  COSY spectrum (600 MHz) of **8**.

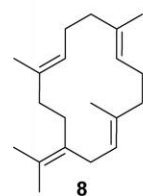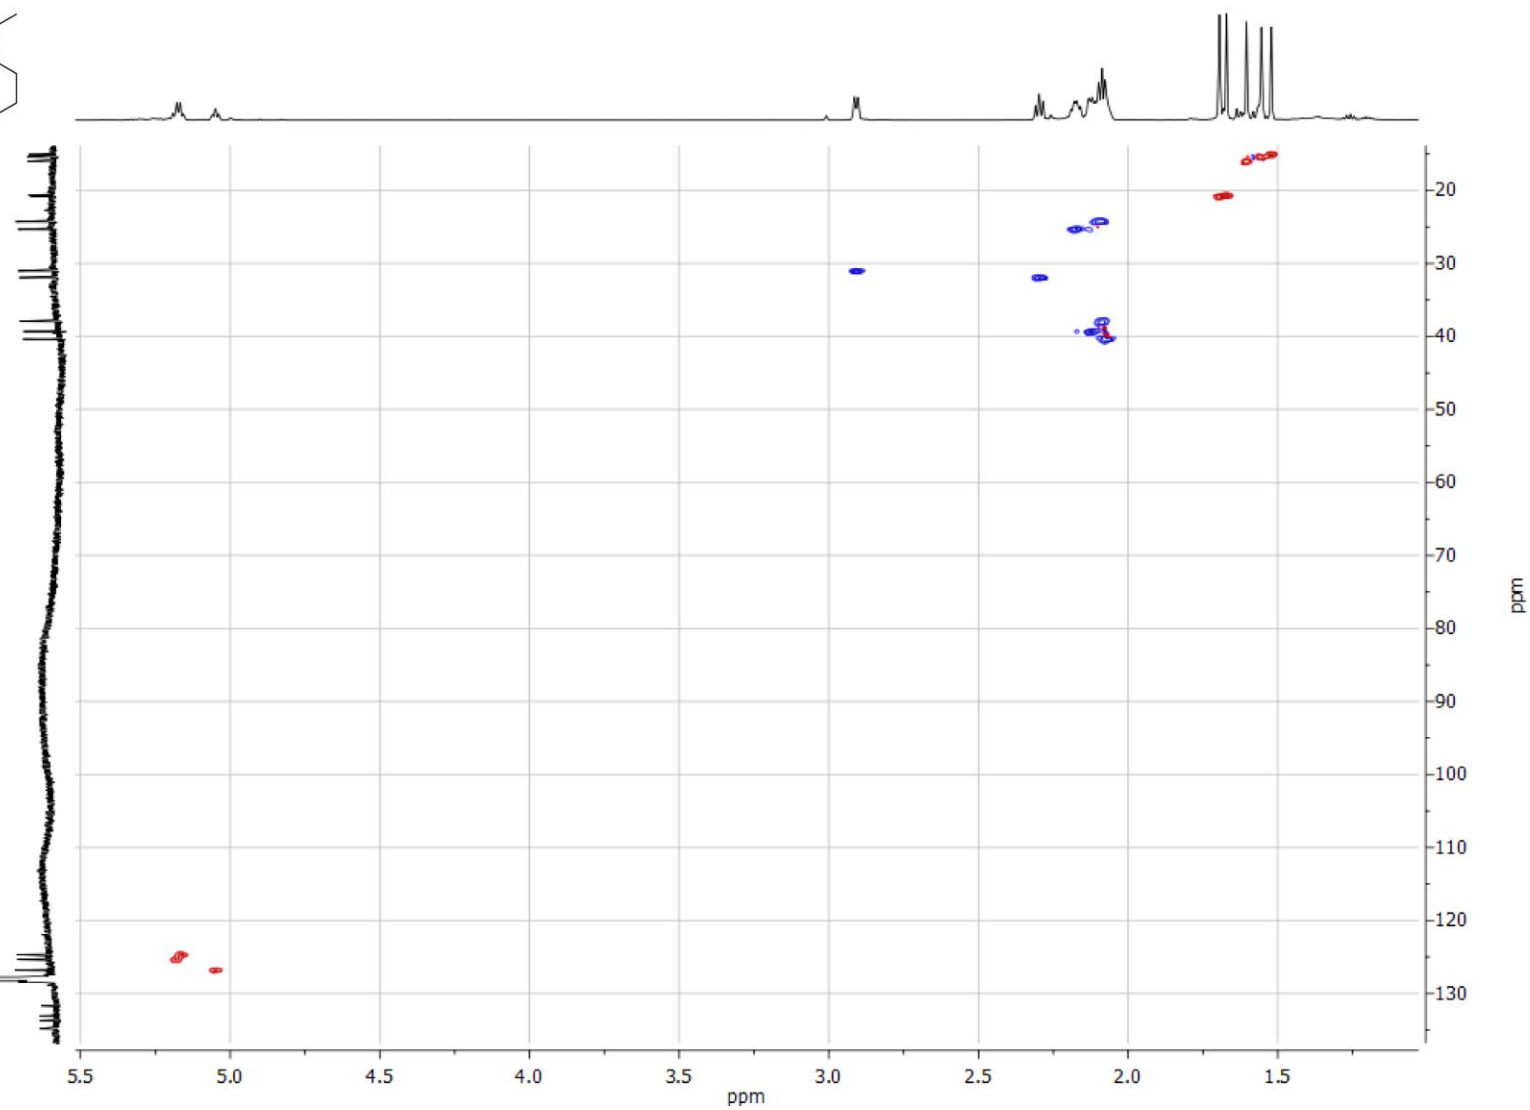

$^1\text{H}$ ,  $^{13}\text{C}$  HSQC spectrum (600 MHz) of **8**.

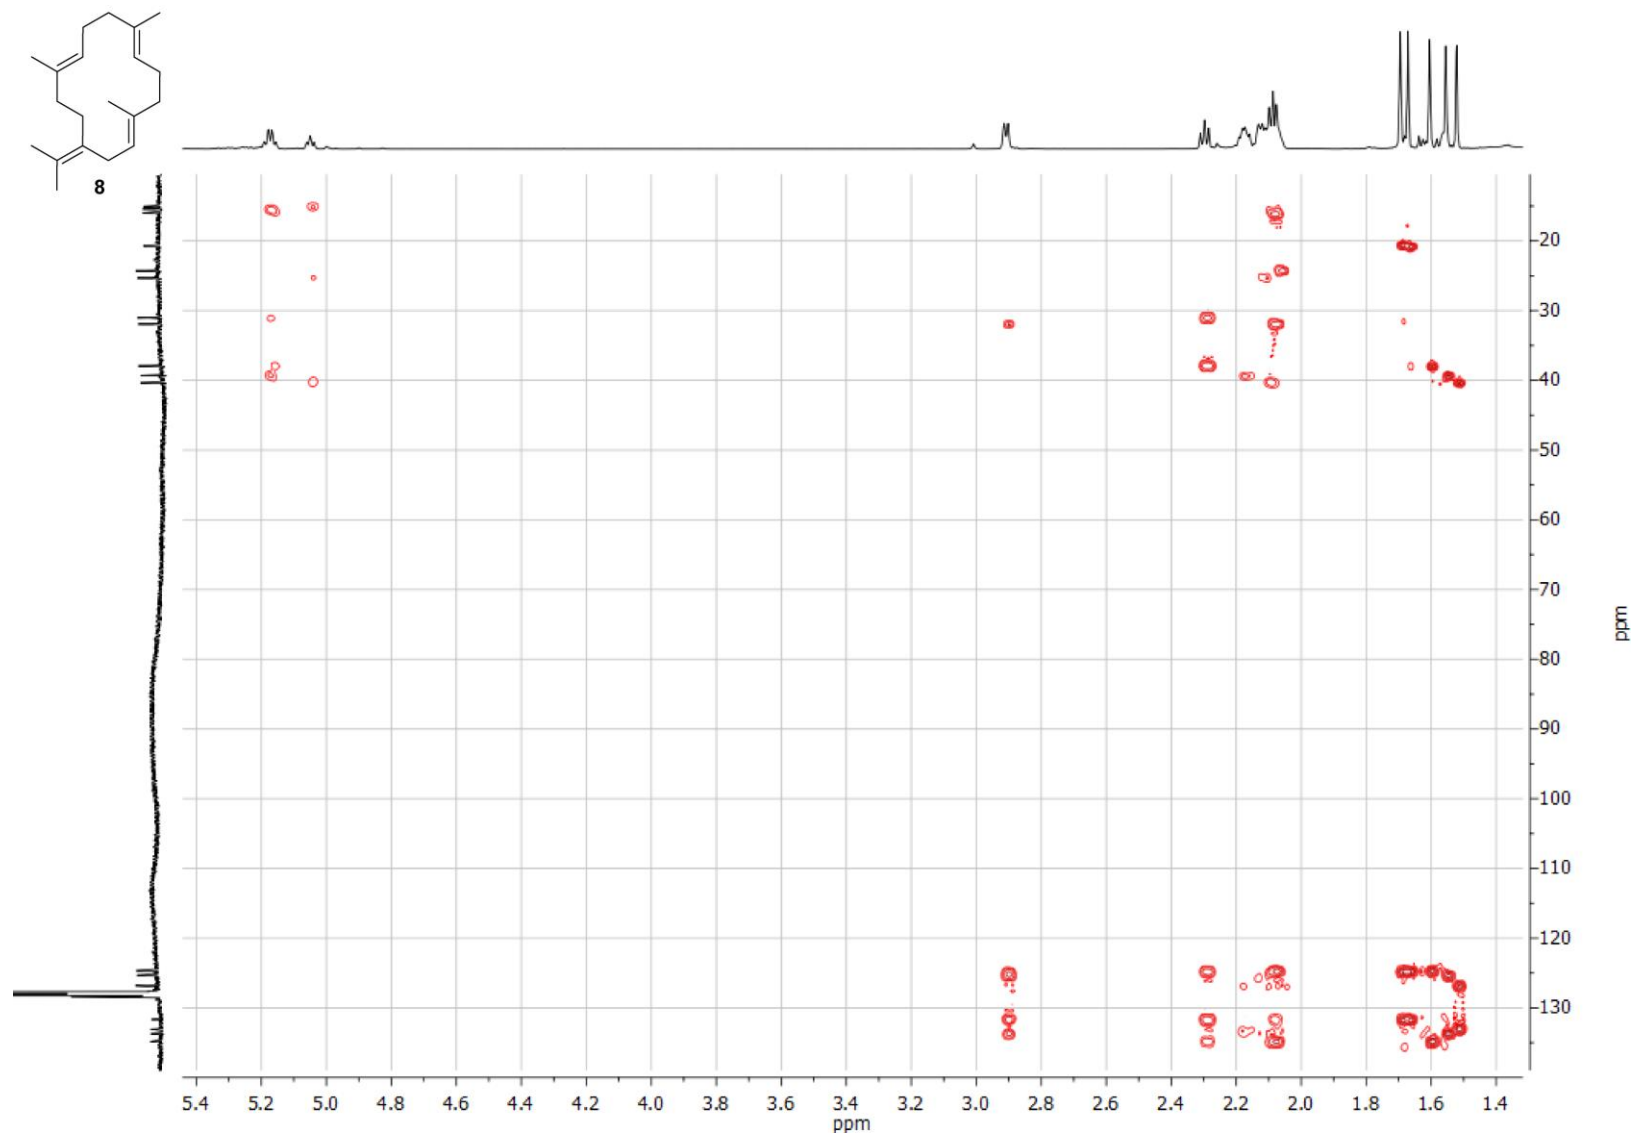

$^1\text{H}$ ,  $^{13}\text{C}$  HMBC spectrum (600 MHz) of **8**



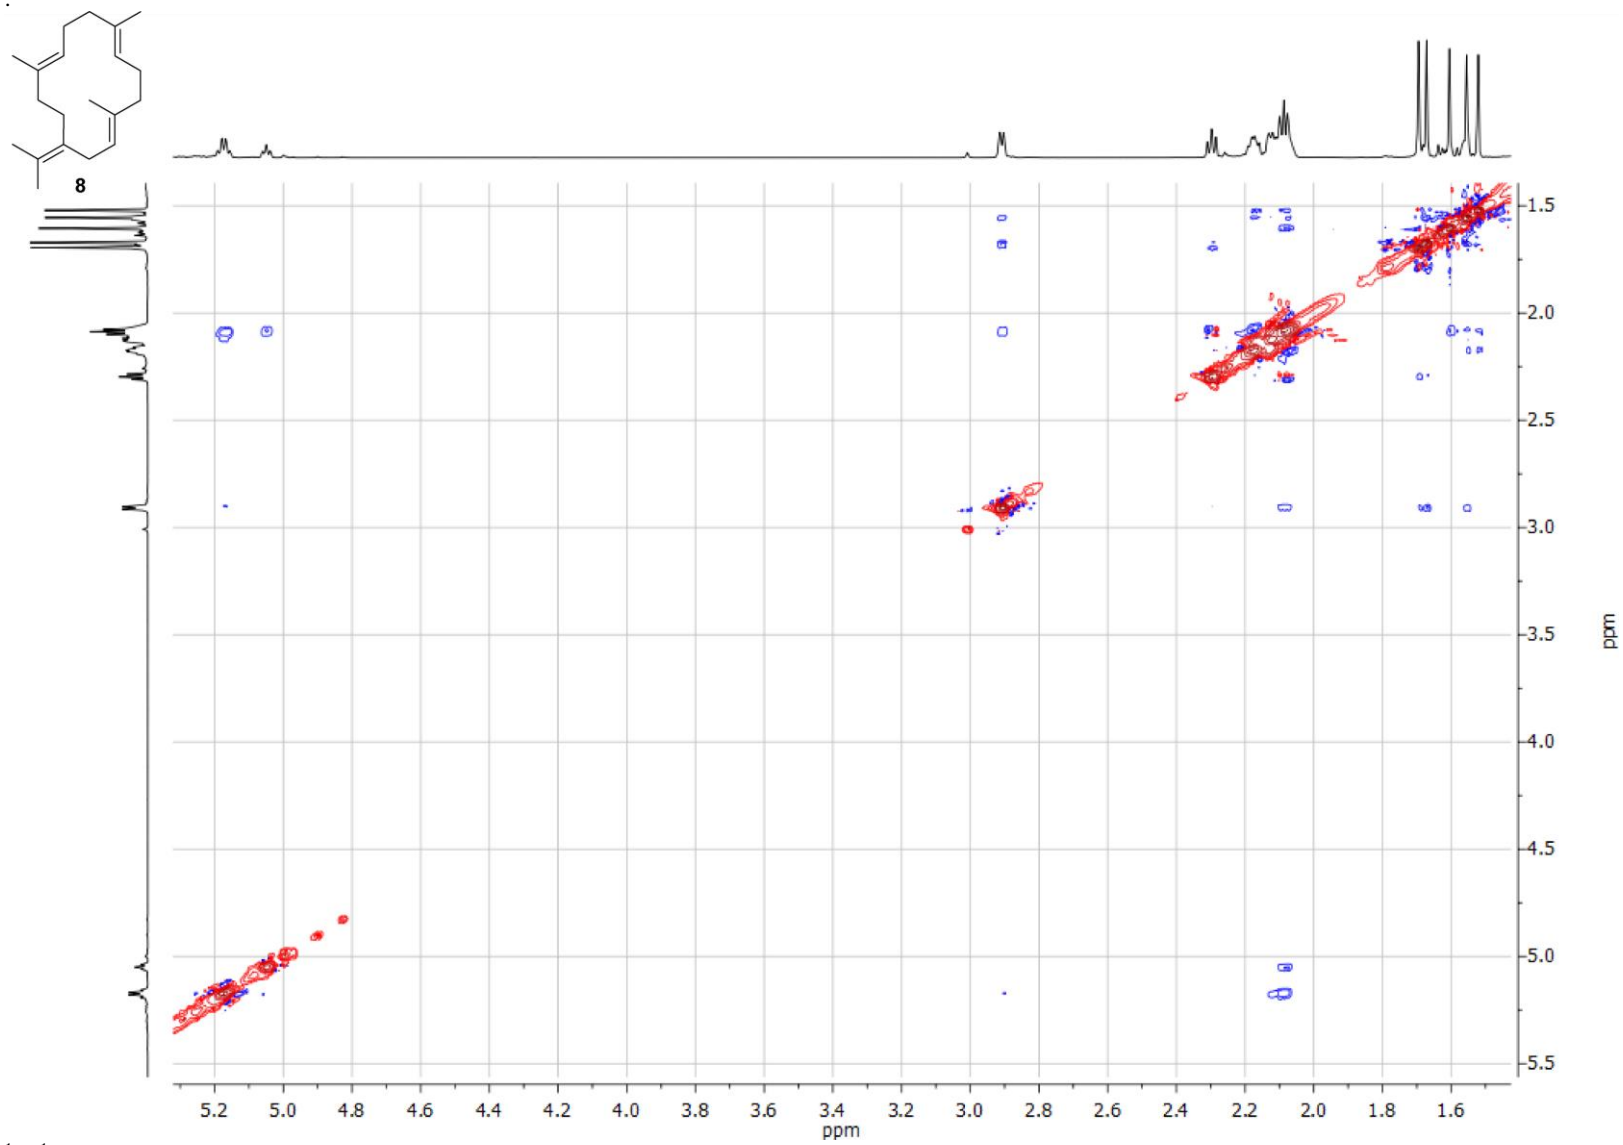

<sup>1</sup>H, <sup>1</sup>H NOESY spectrum (500 MHz) of **8**.

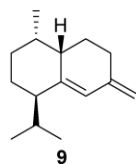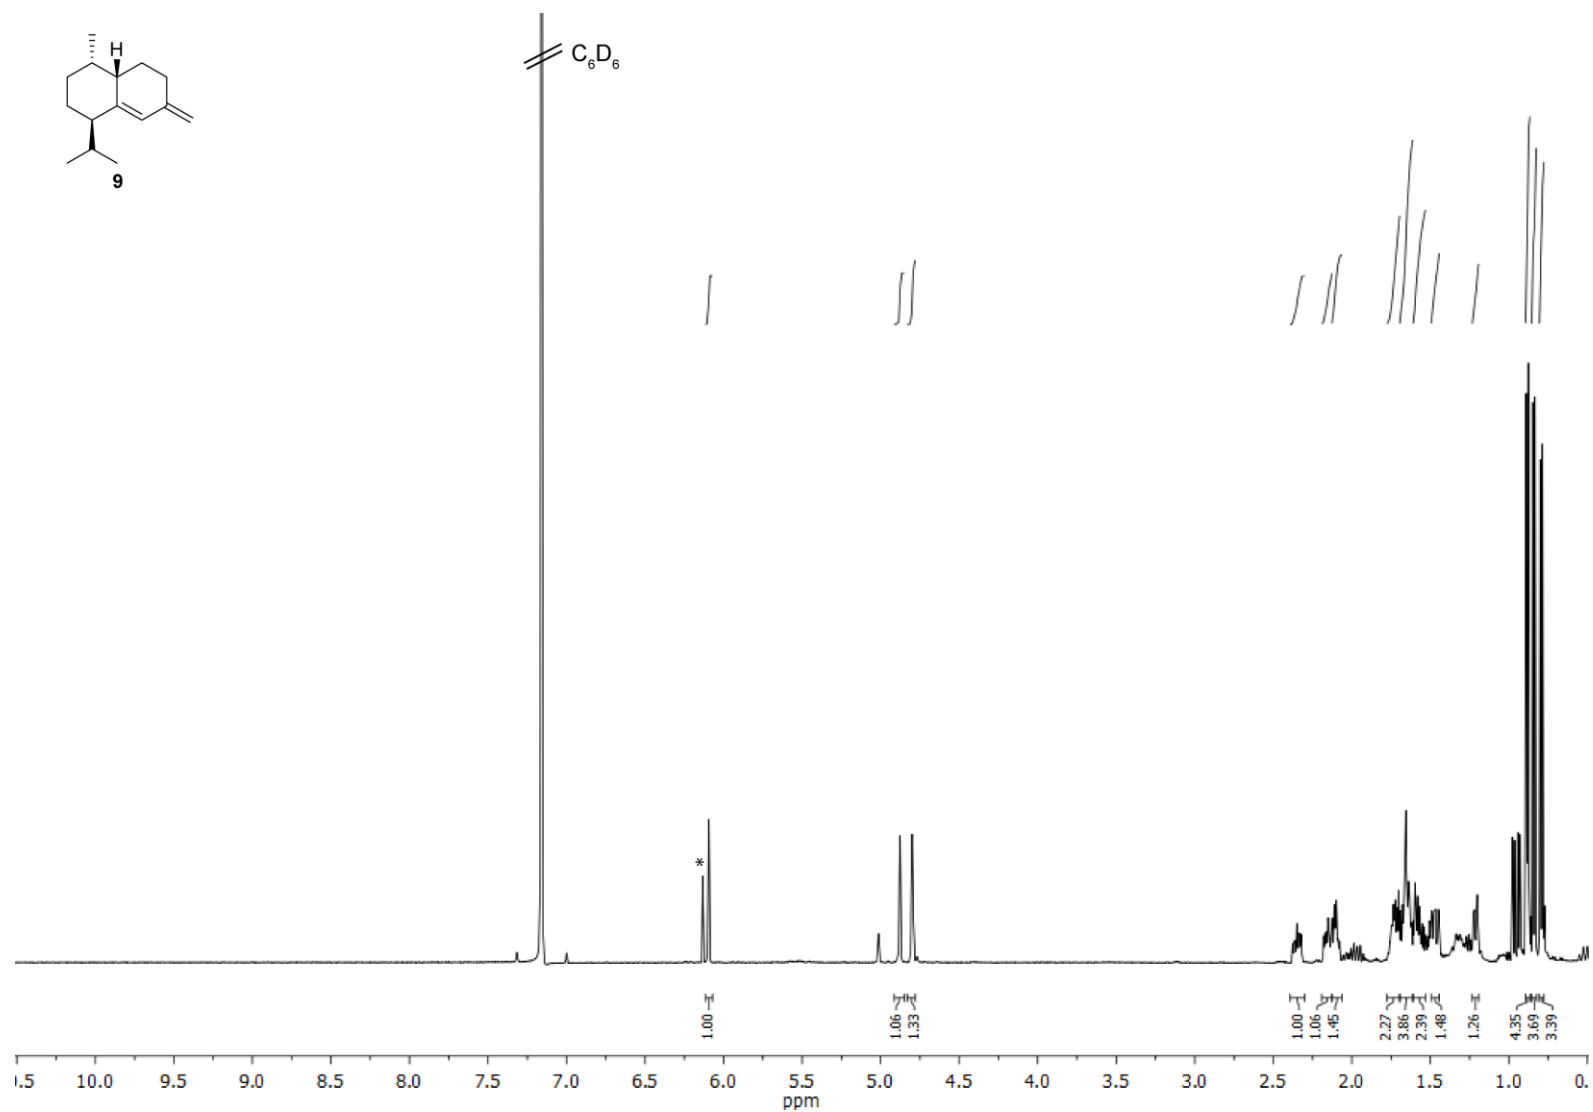

$^1\text{H}$  NMR spectrum (500 MHz) of **9**. Asterisk denotes residual chloroform. Other minor signals originate from an inseparable second unidentified sesquiterpene.

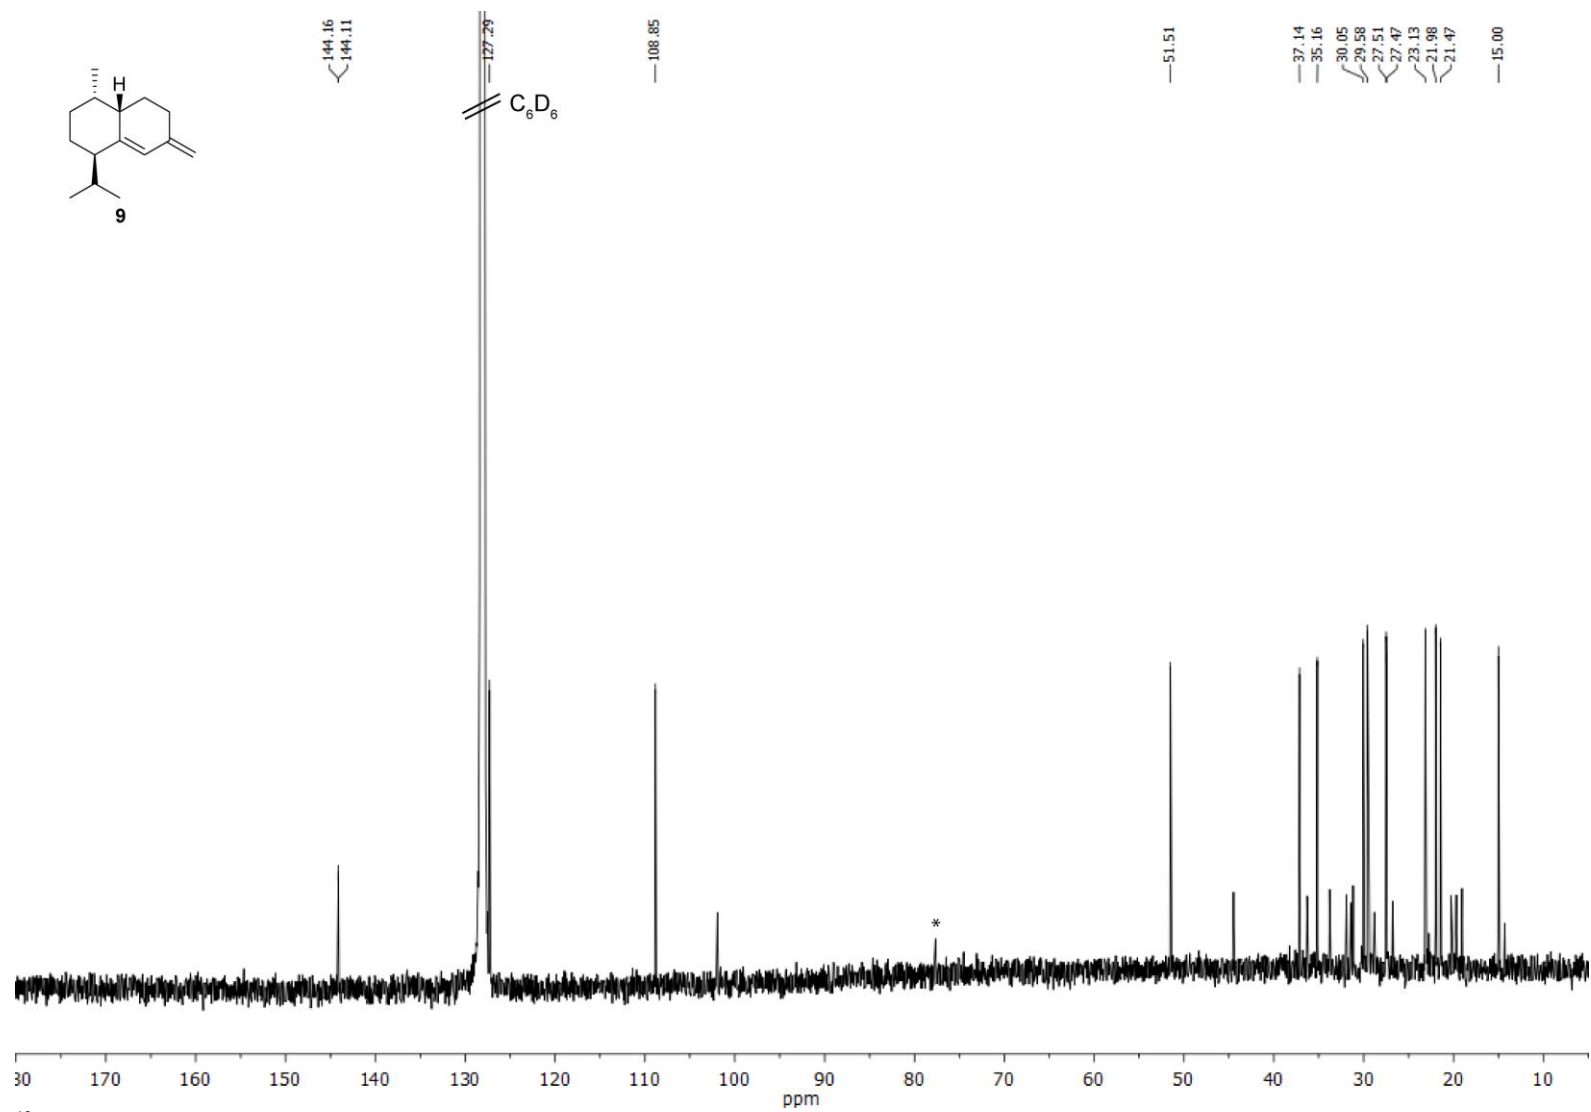

<sup>13</sup>C NMR spectrum (125 MHz) of **9**. Asterisk denotes residual chloroform. Other minor signals originate from an inseparable second unidentified sesquiterpene.

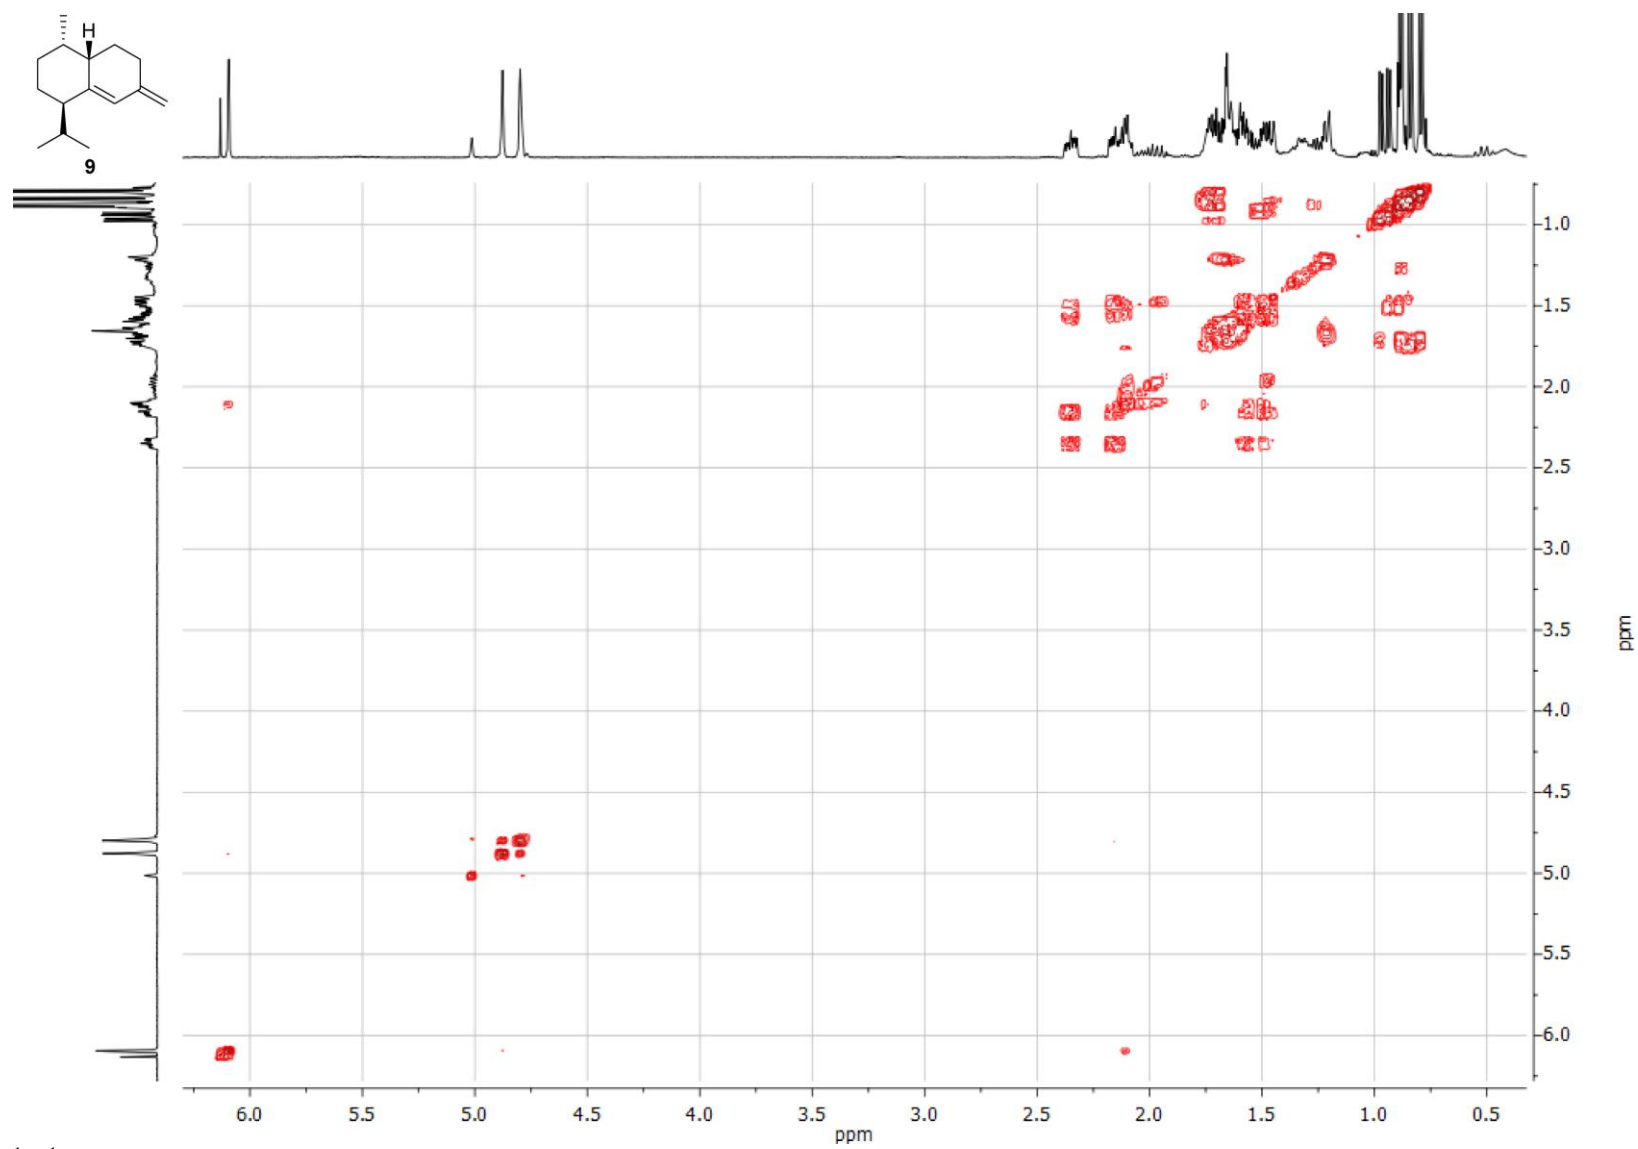

$^1\text{H}$ ,  $^1\text{H}$  COSY spectrum (500 MHz) of **9**.

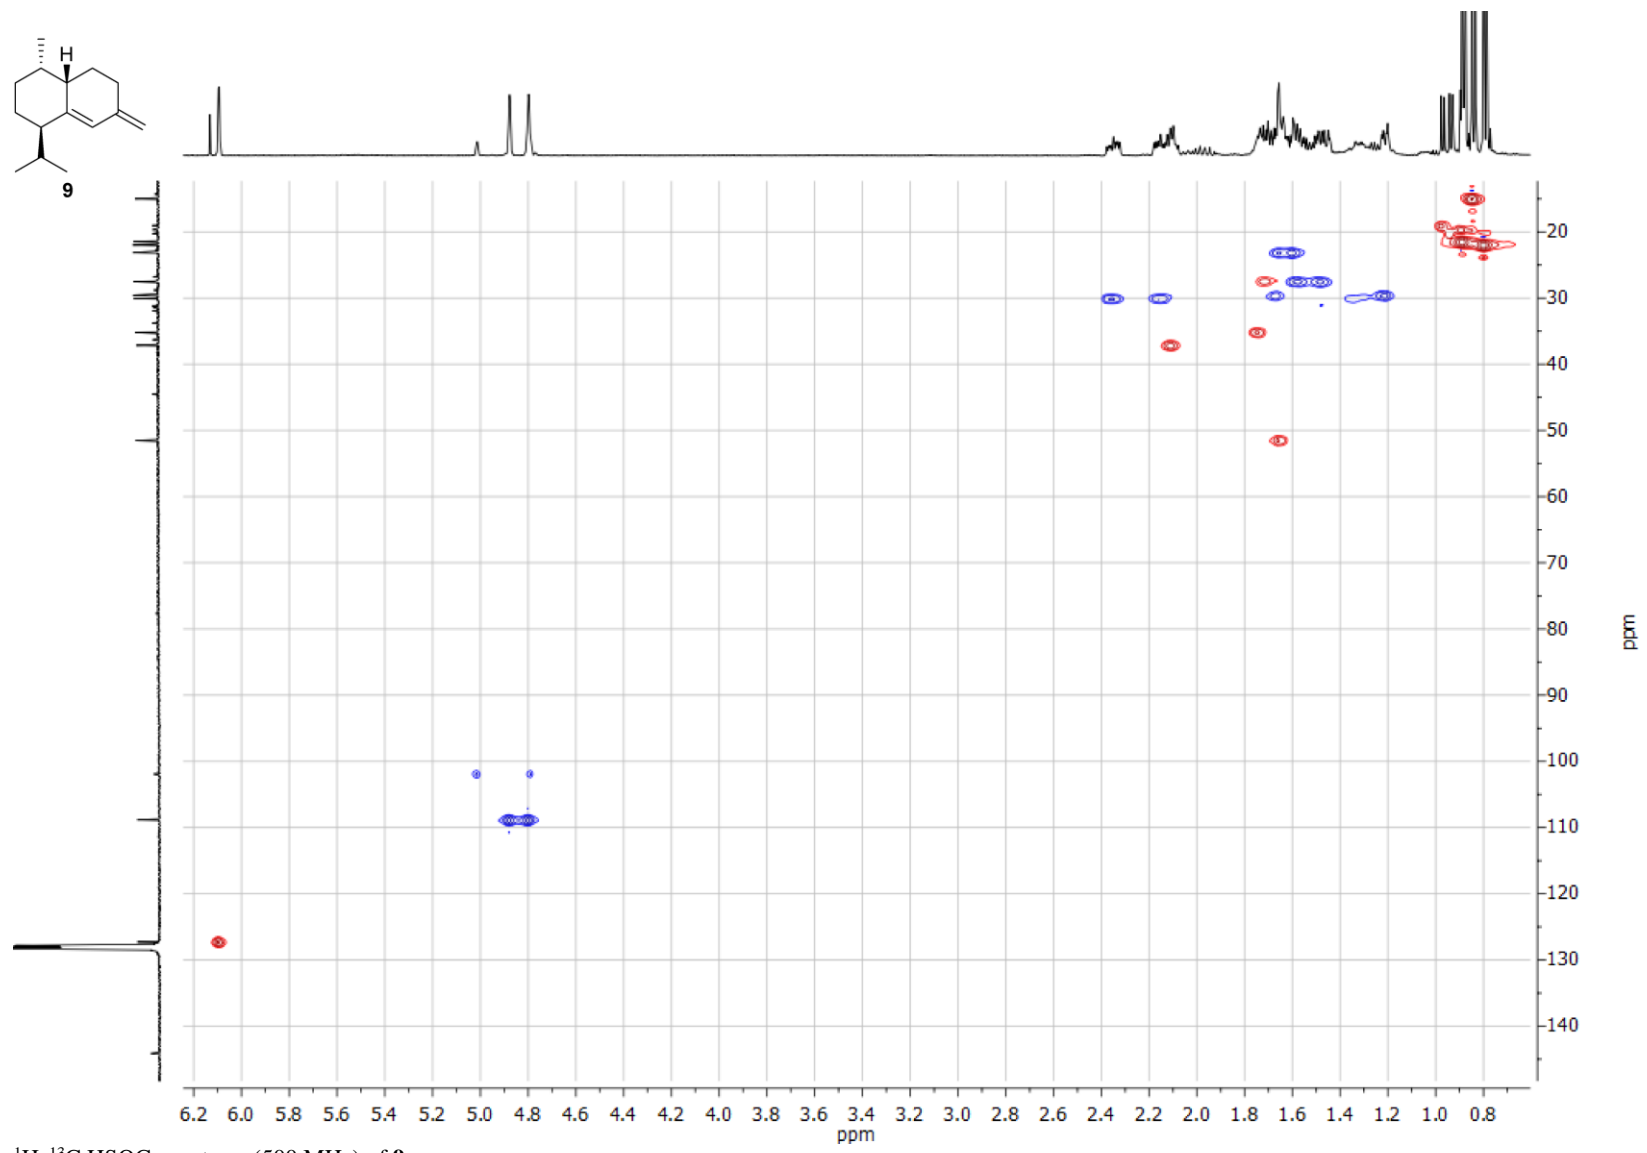

$^1\text{H}$ ,  $^{13}\text{C}$  HSQC spectrum (500 MHz) of **9**.

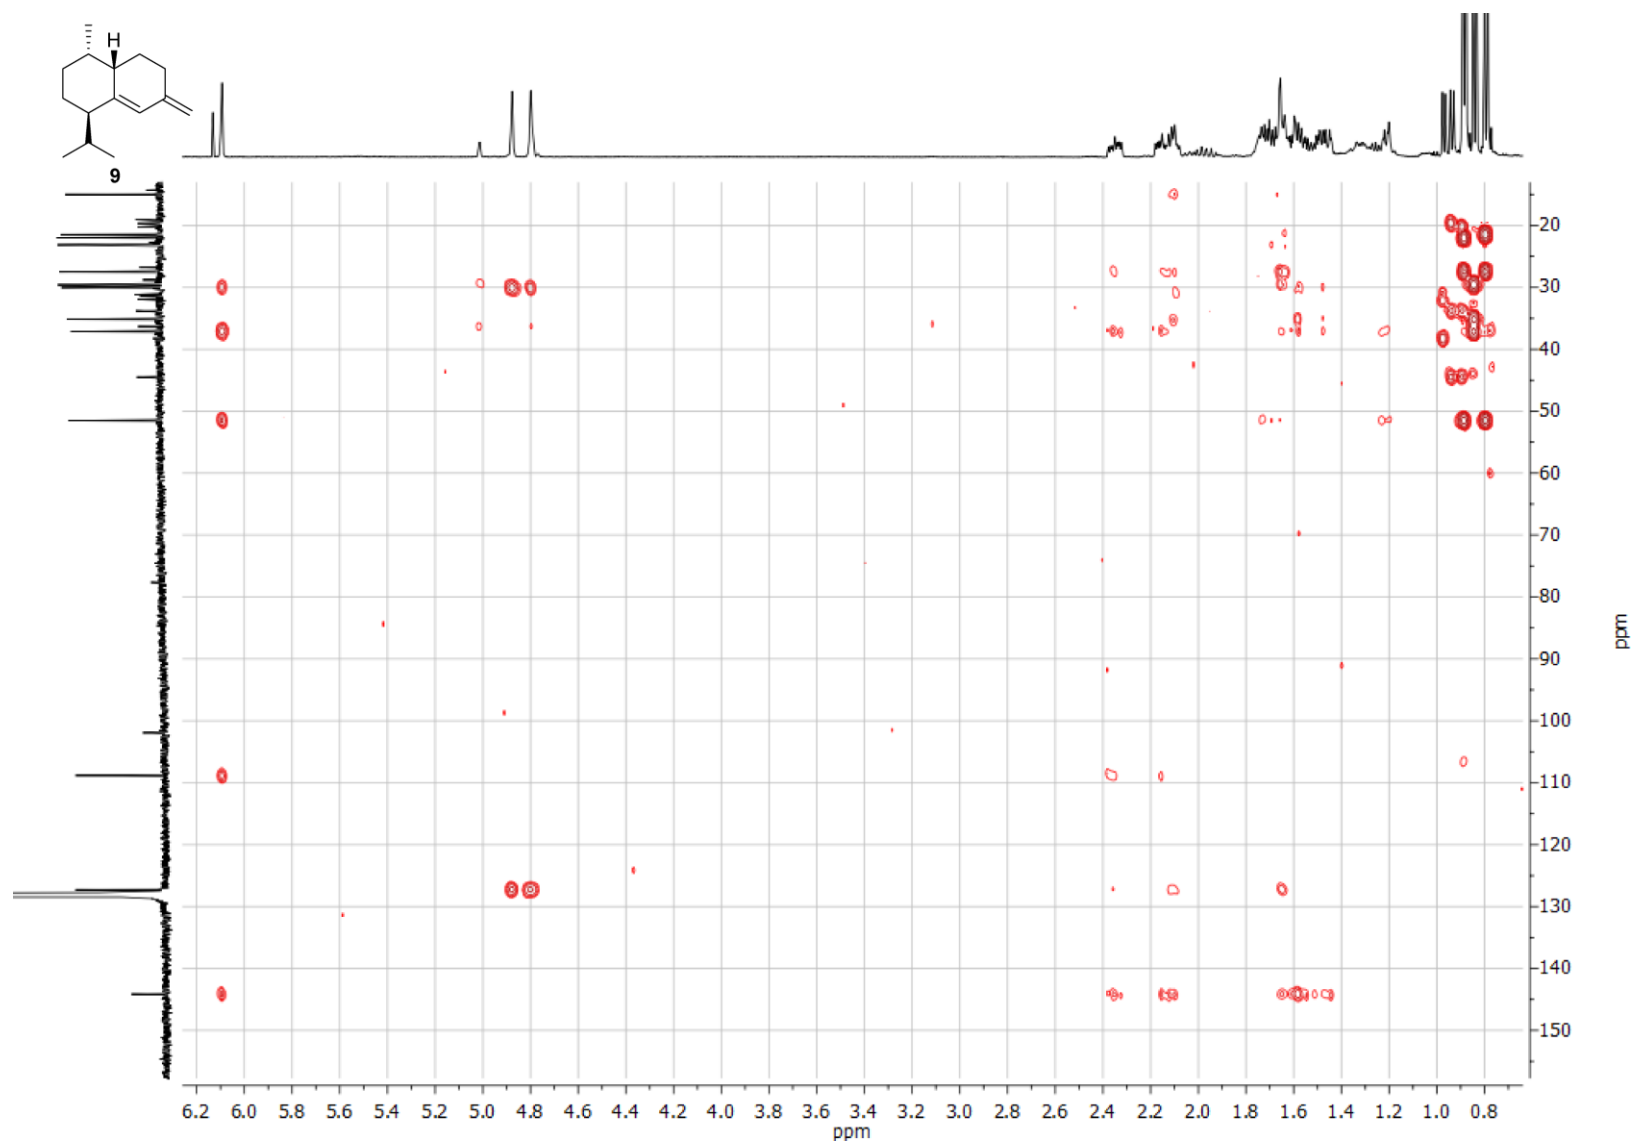

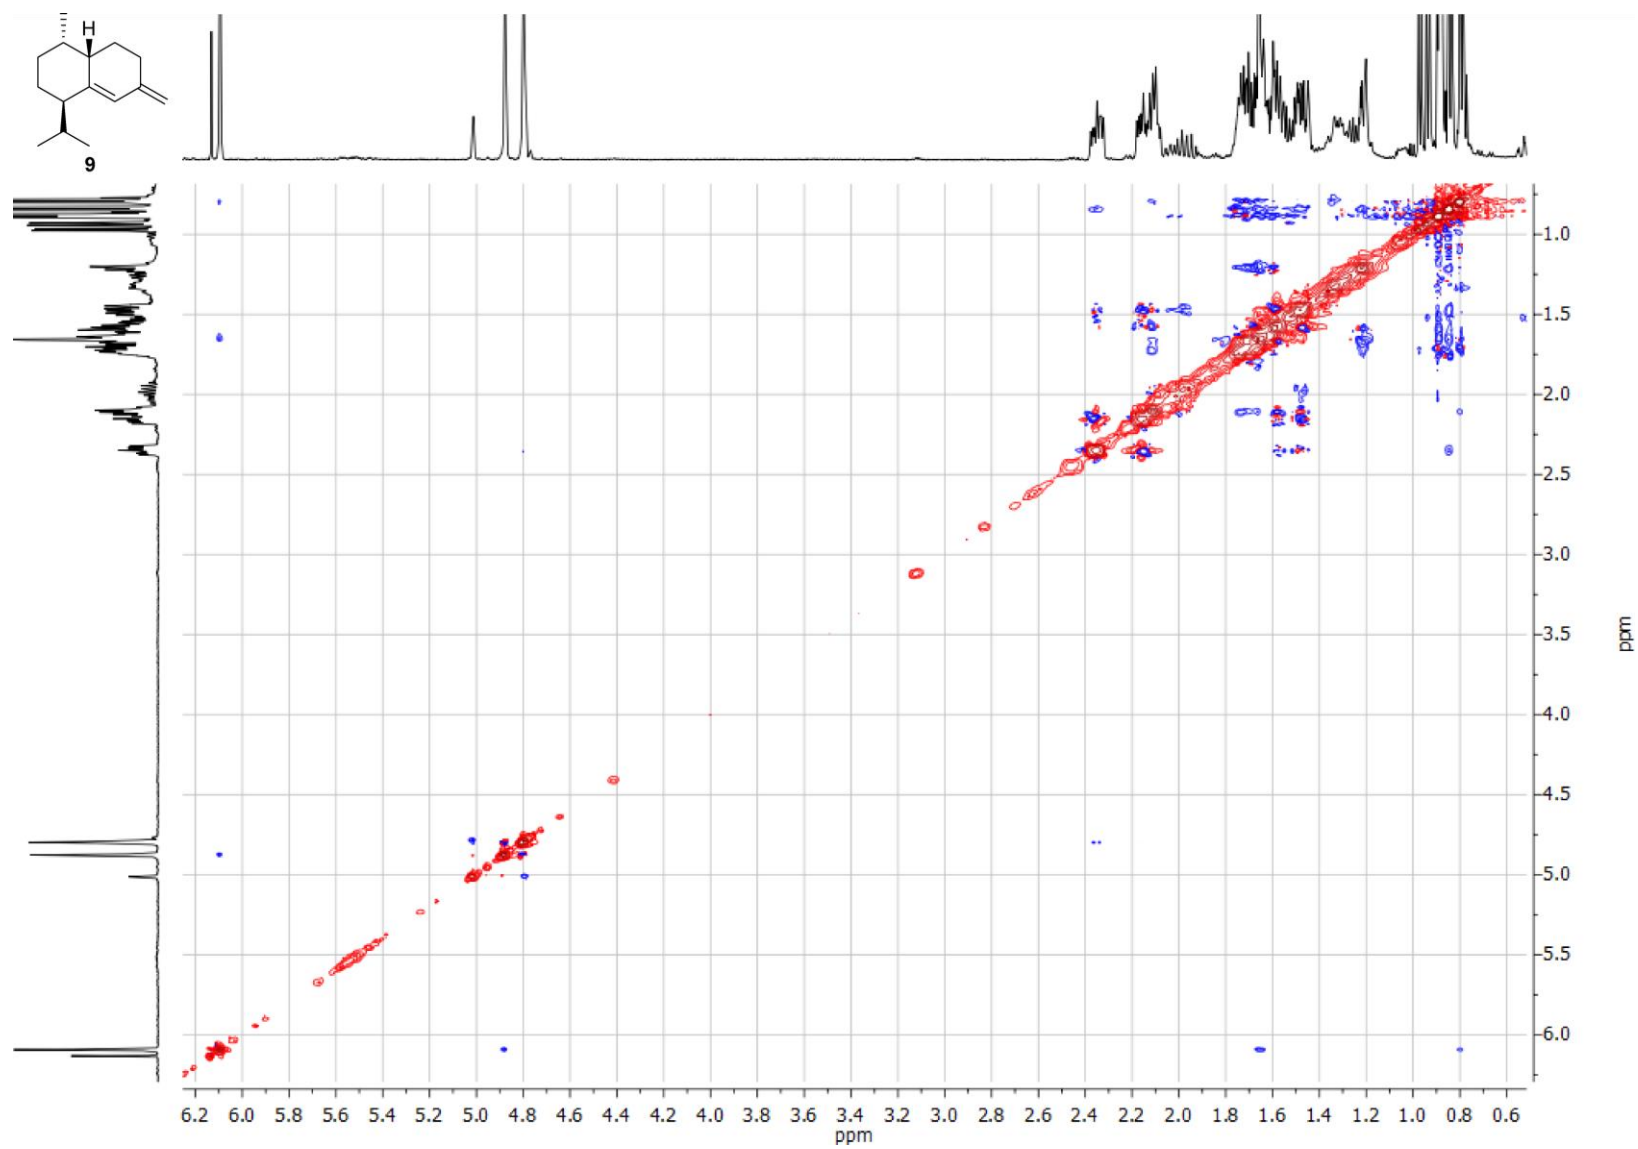

$^1\text{H}$ ,  $^1\text{H}$  NOESY spectrum (500 MHz) of **9**.

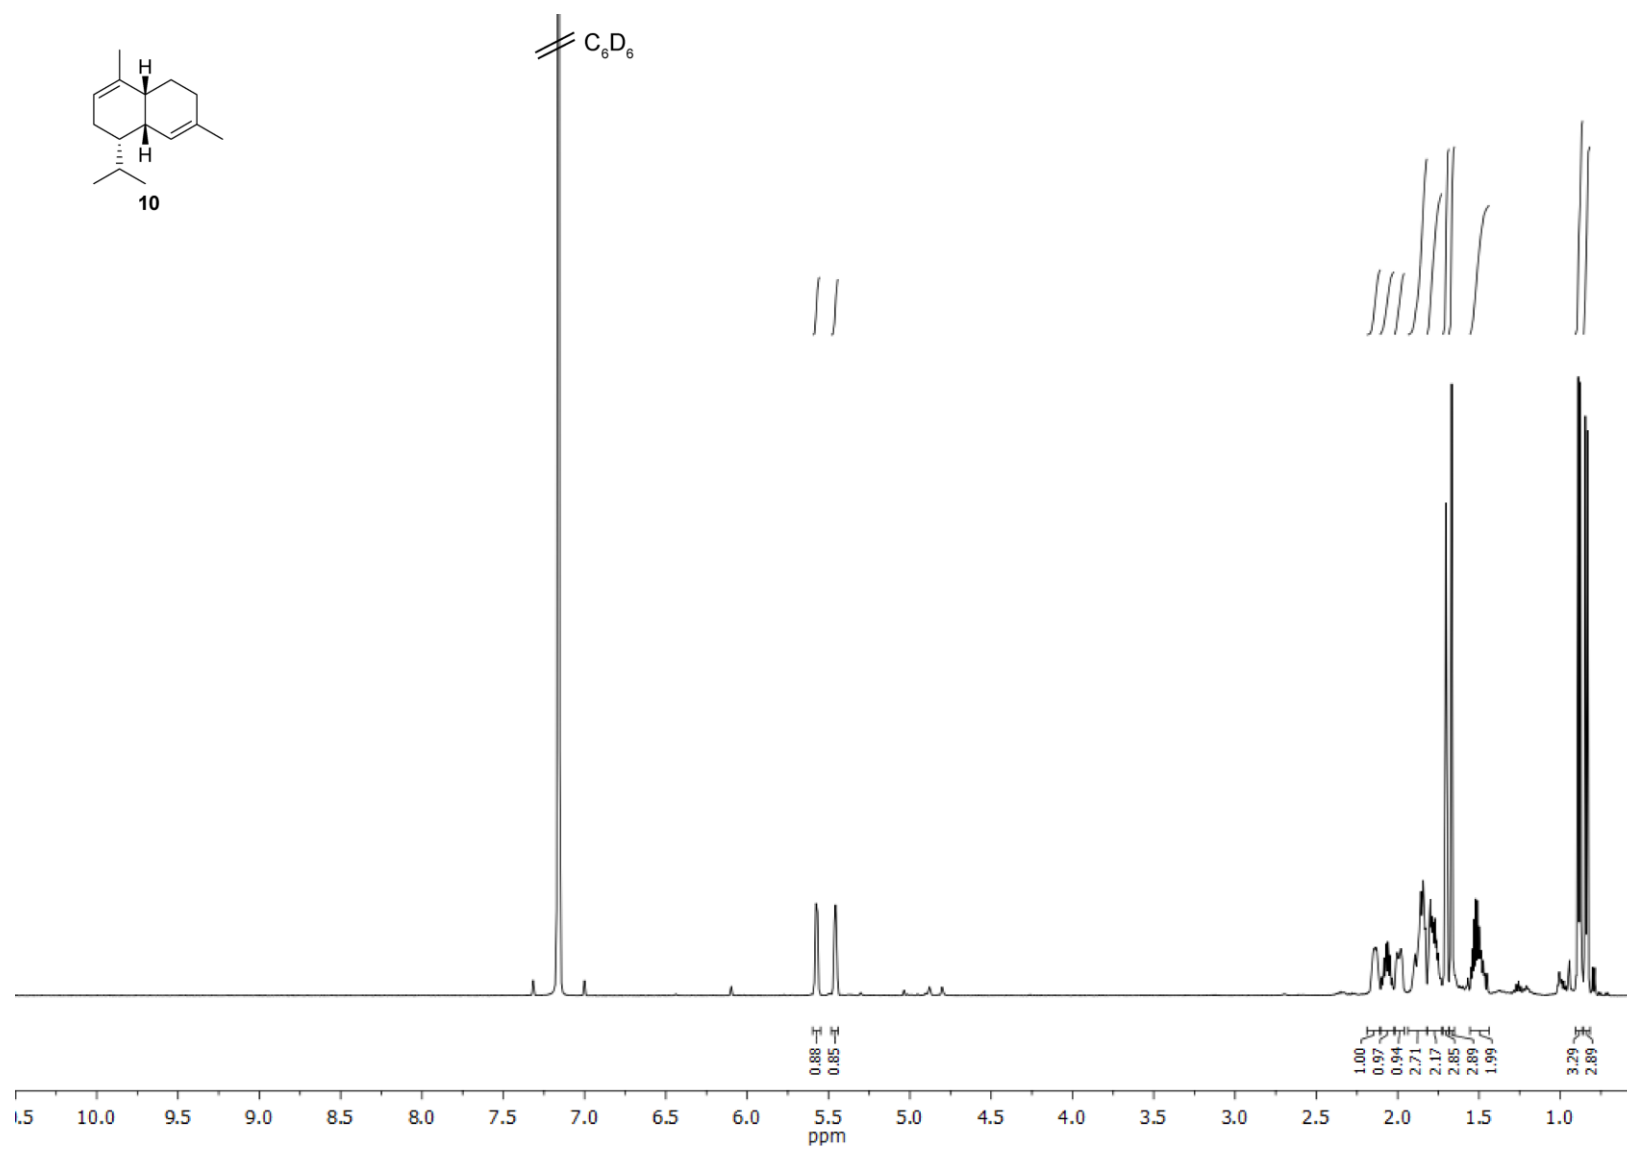

$^1\text{H}$  NMR spectrum (500 MHz) of **10**.



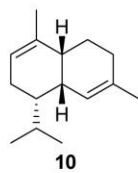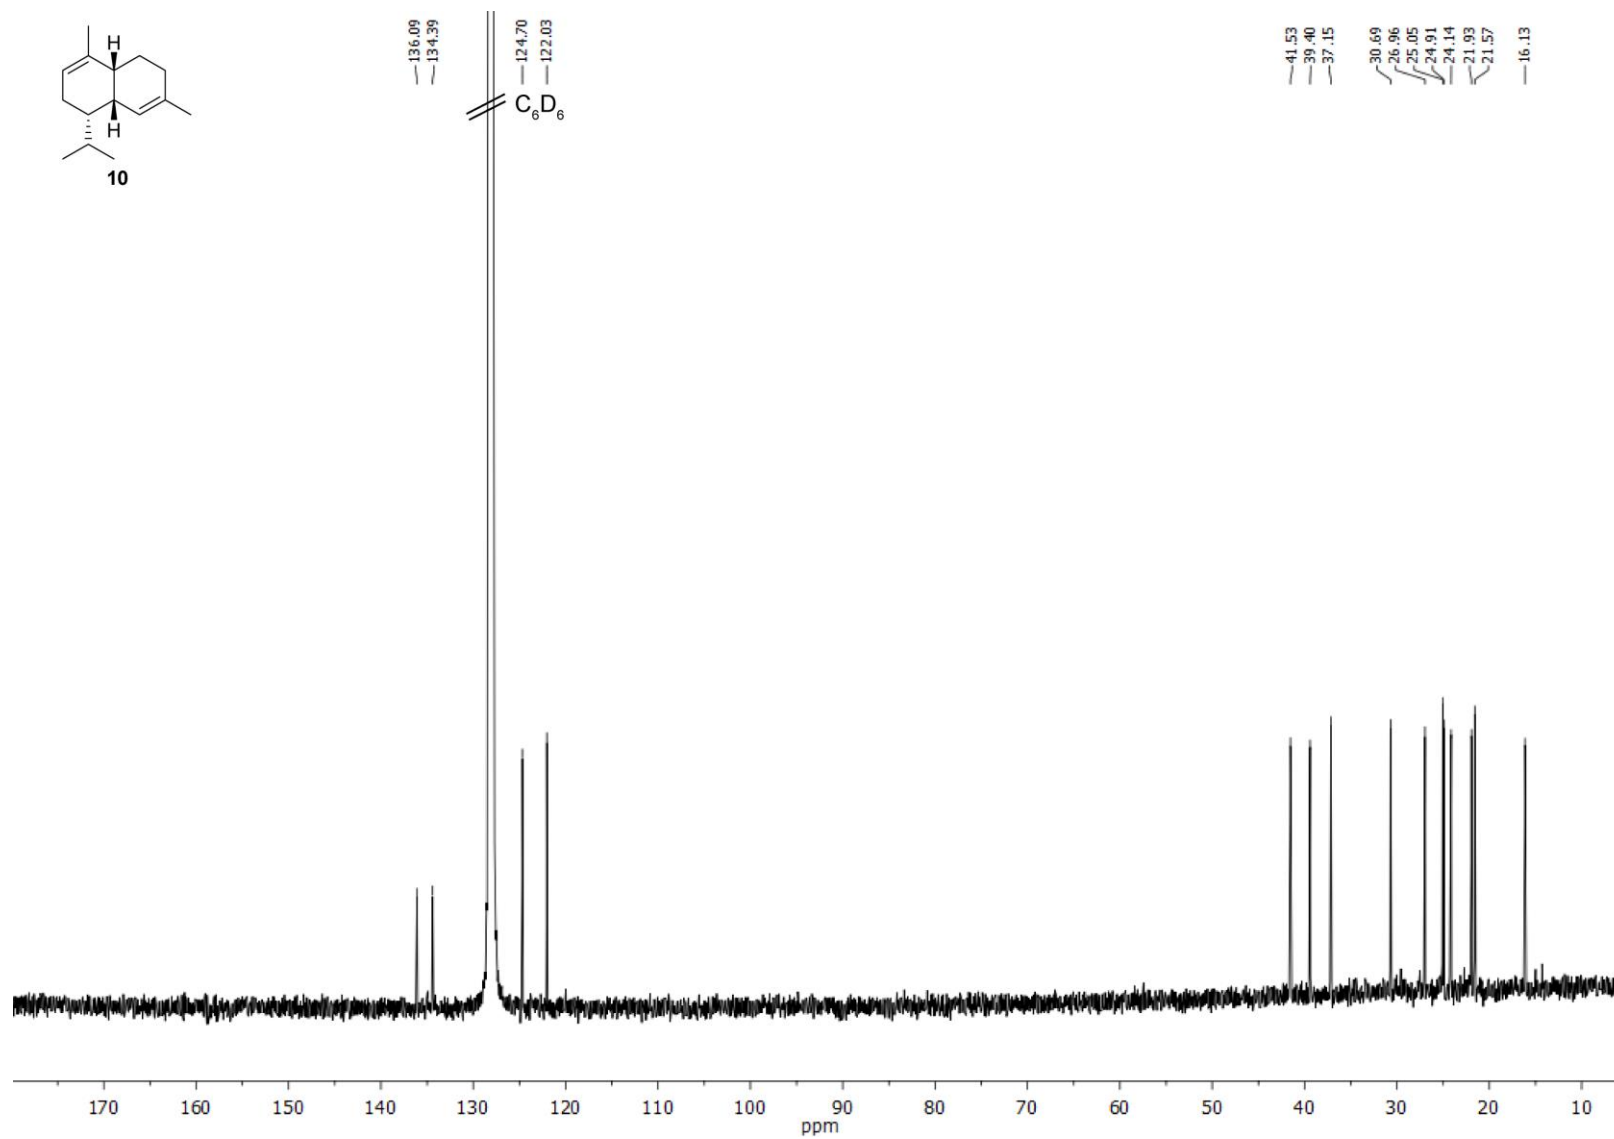

$^{13}C$  NMR spectrum (125 MHz) of **10**.

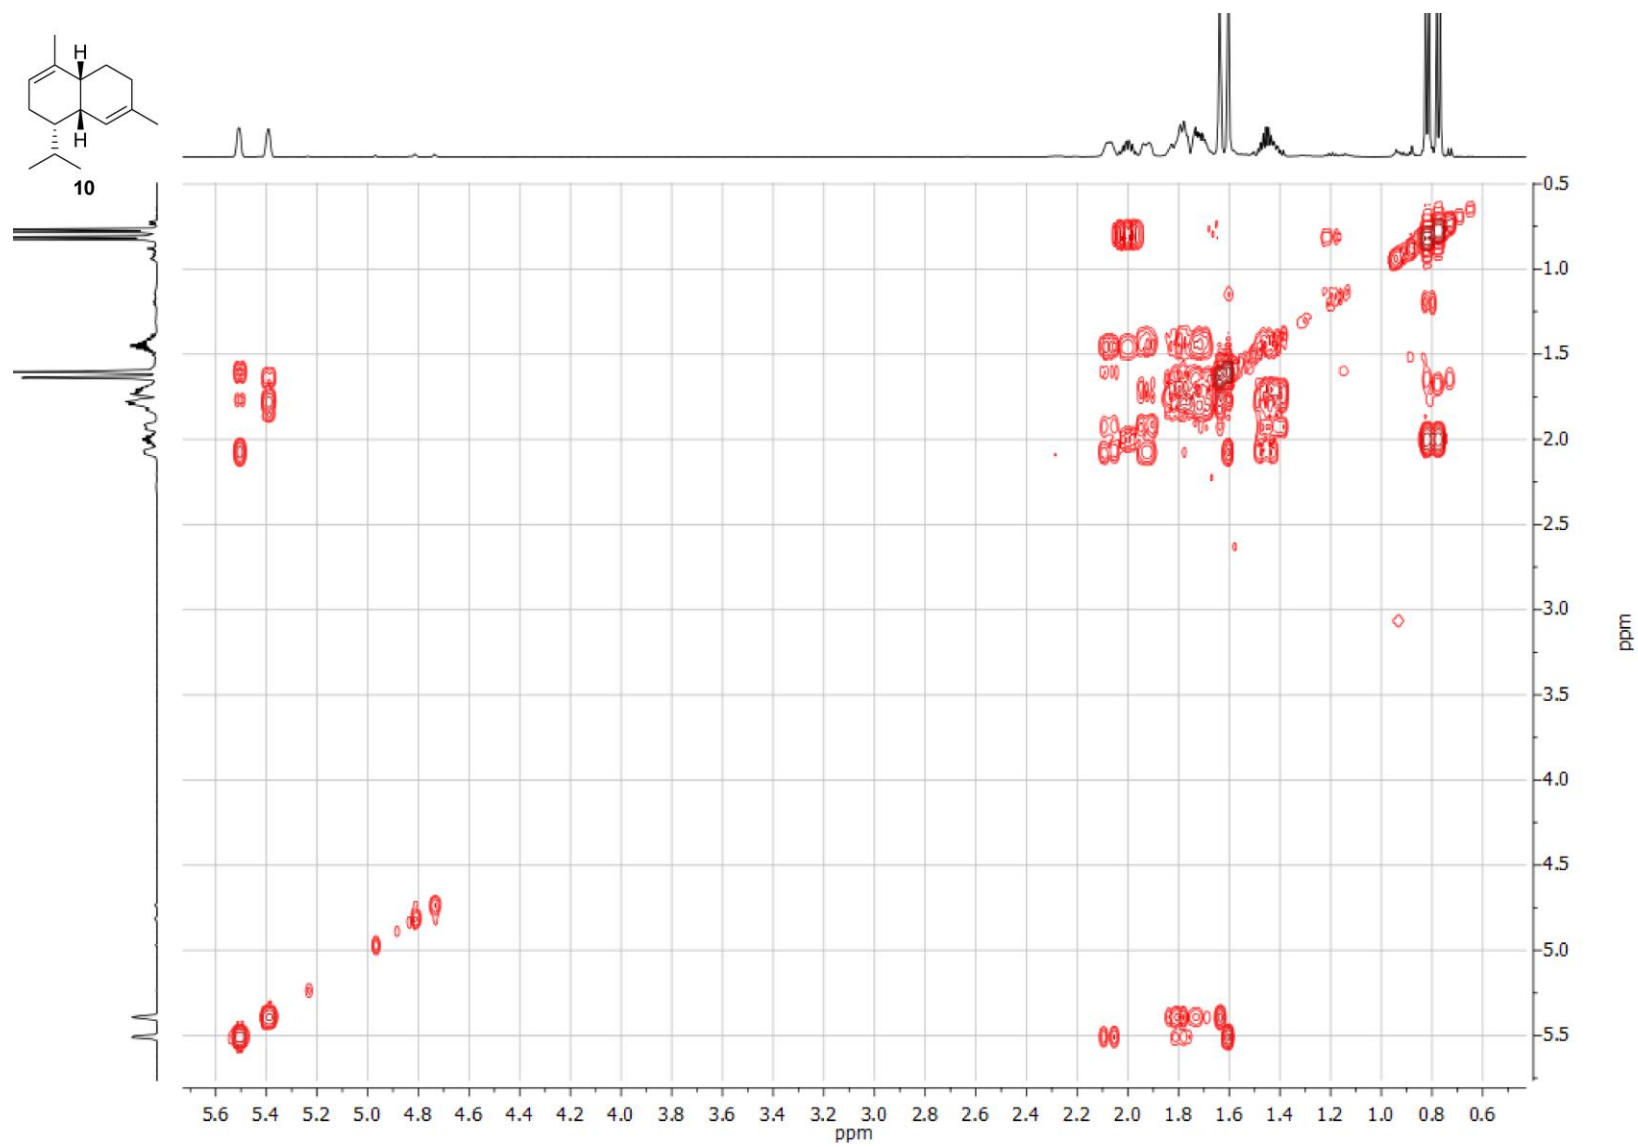

$^1\text{H}$ ,  $^1\text{H}$  COSY spectrum (500 MHz) of **10**.

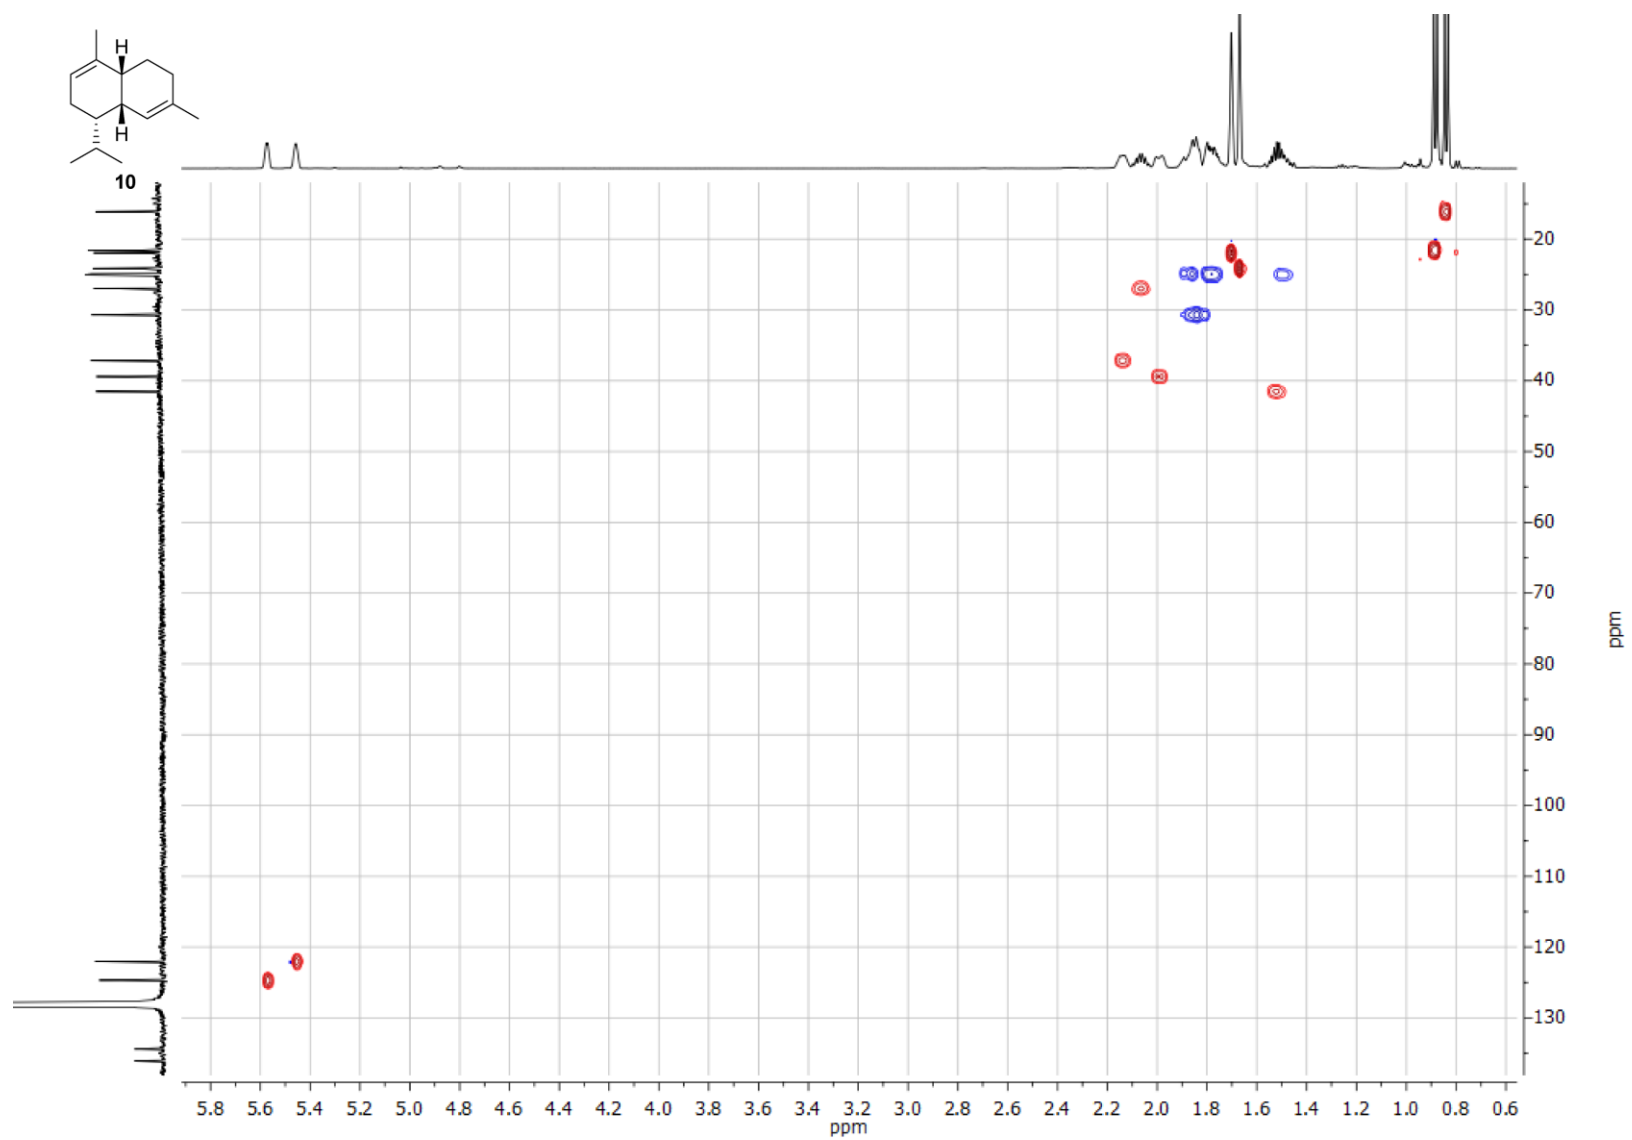

$^1\text{H}$ ,  $^{13}\text{C}$  HSQC spectrum (500 MHz) of **10**.

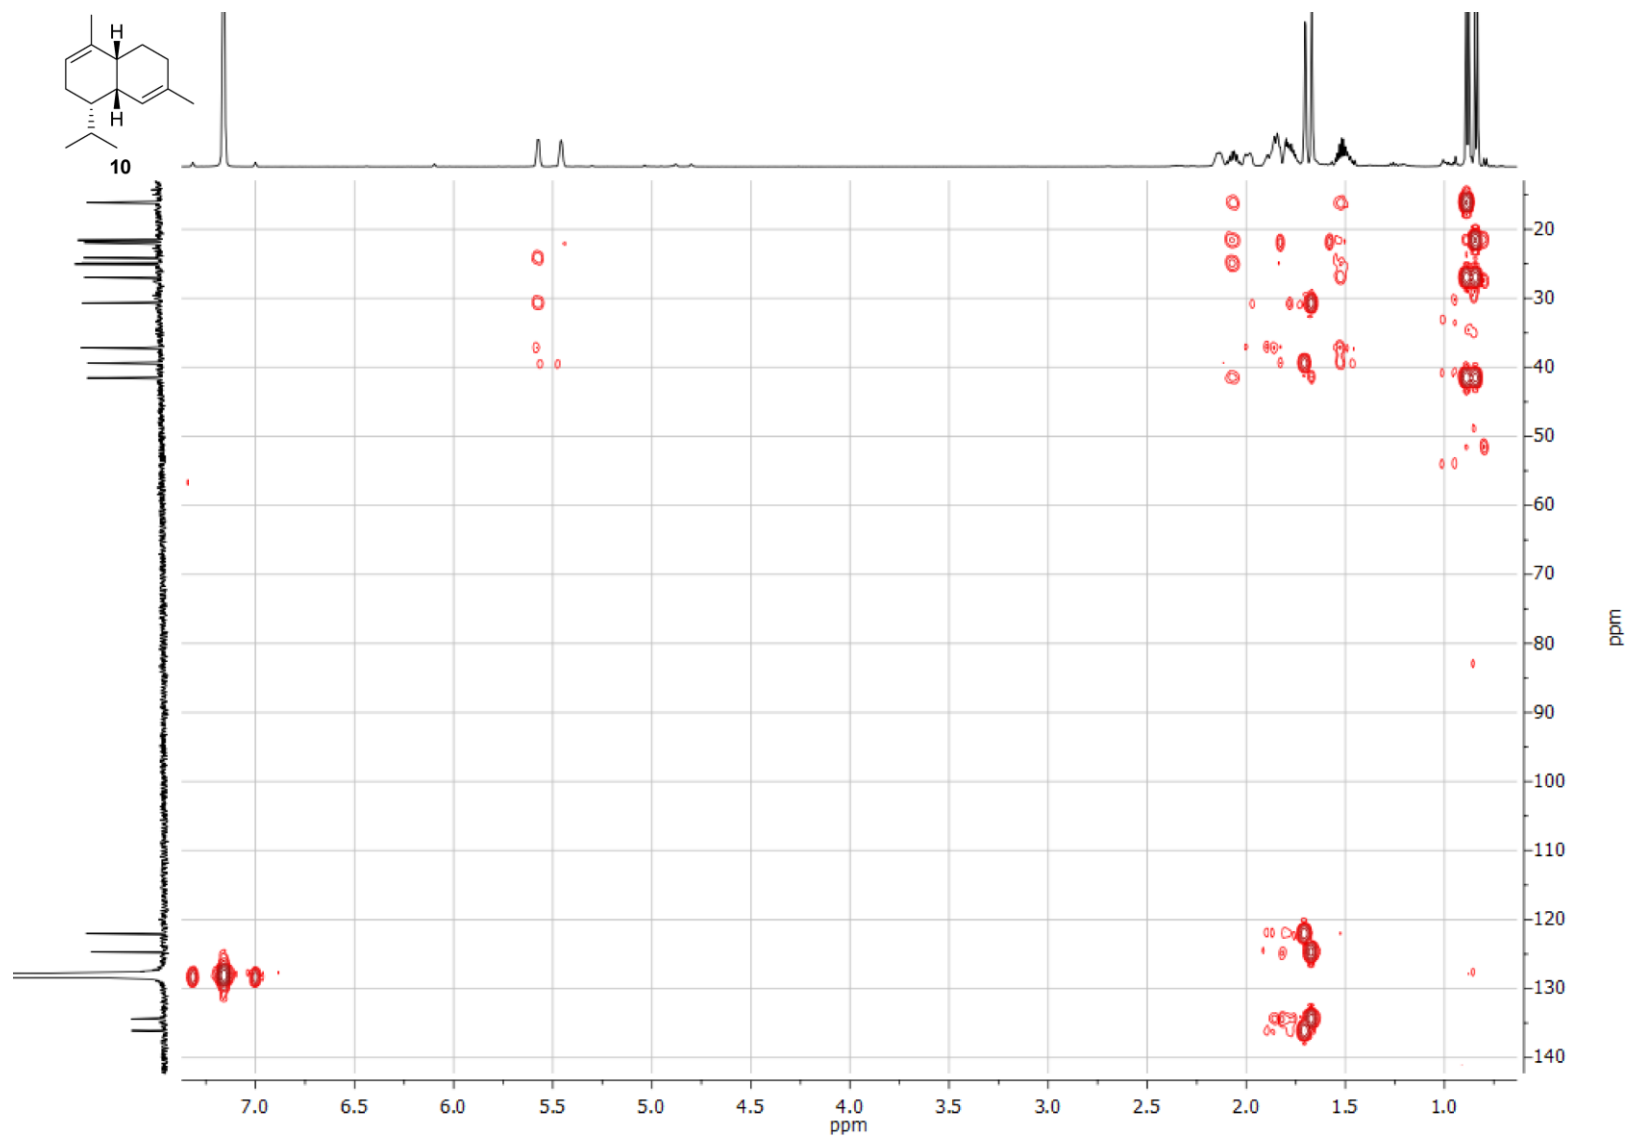

$^1\text{H}$ ,  $^{13}\text{C}$  HMBC spectrum (500 MHz) of **10**.

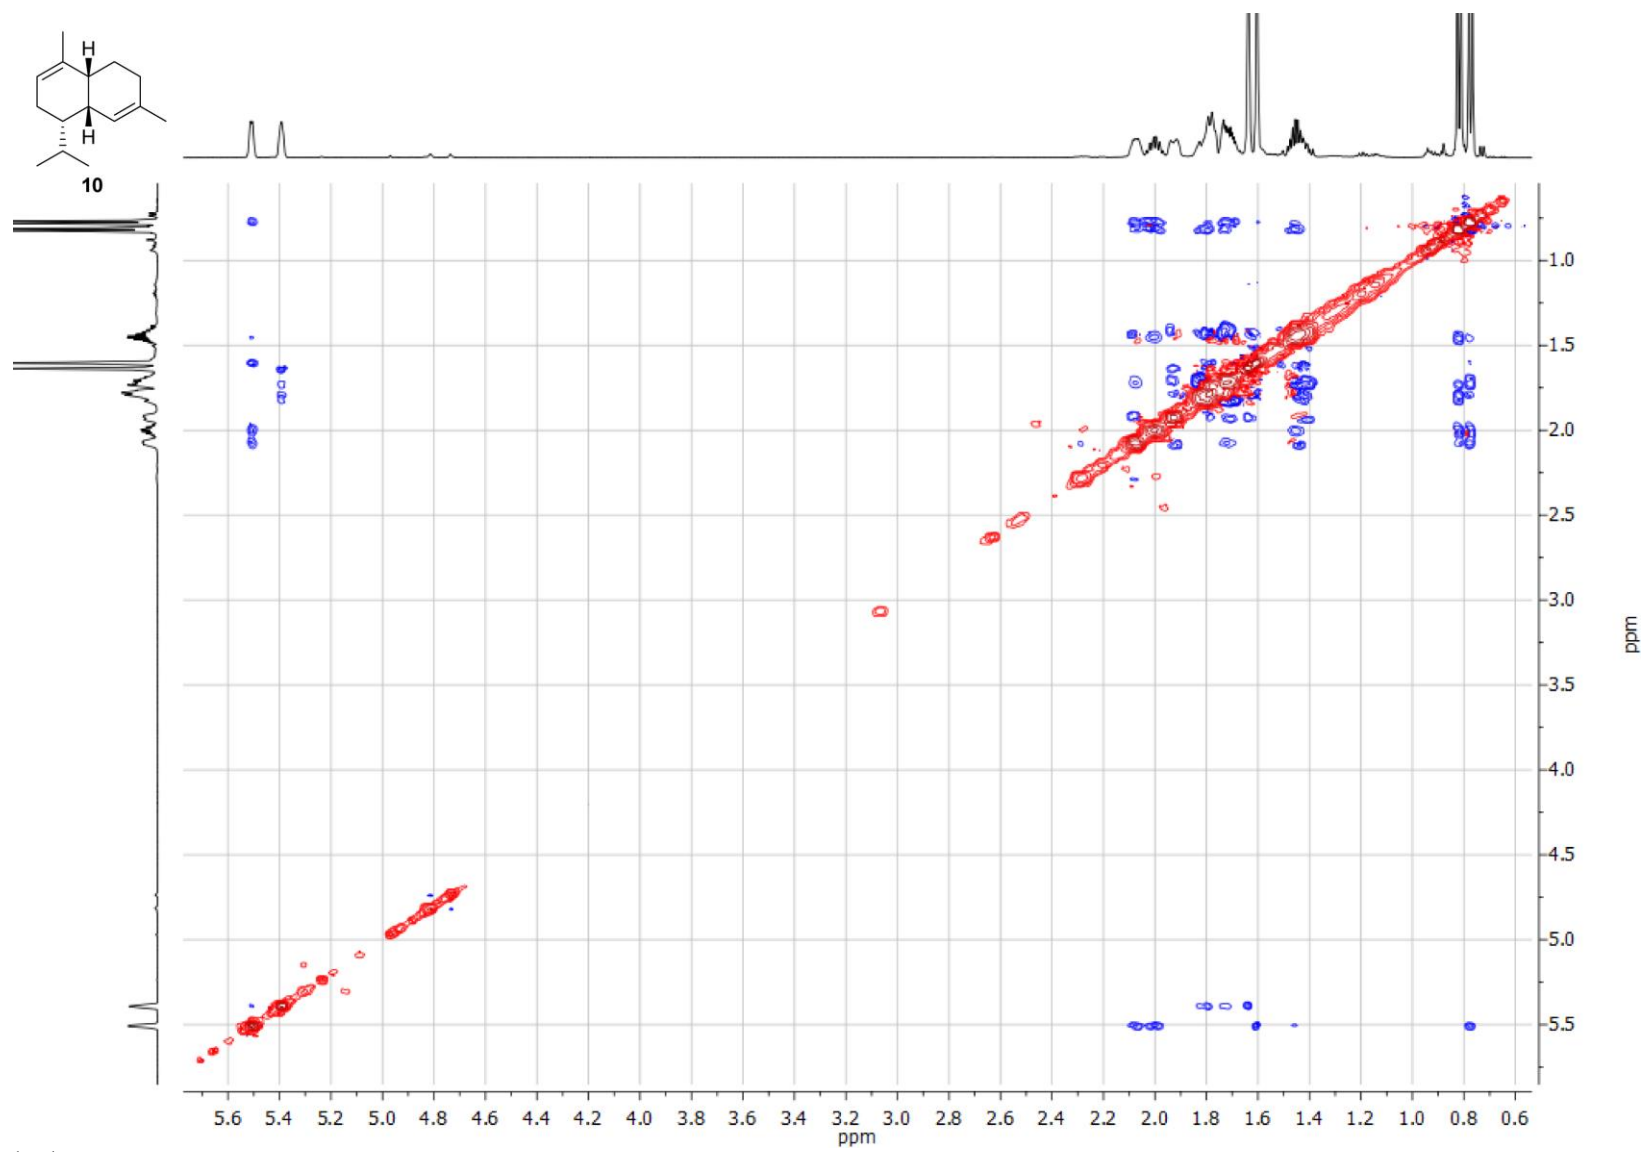

$^1\text{H}$ ,  $^1\text{H}$  NOESY spectrum (500 MHz) of **10**.

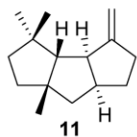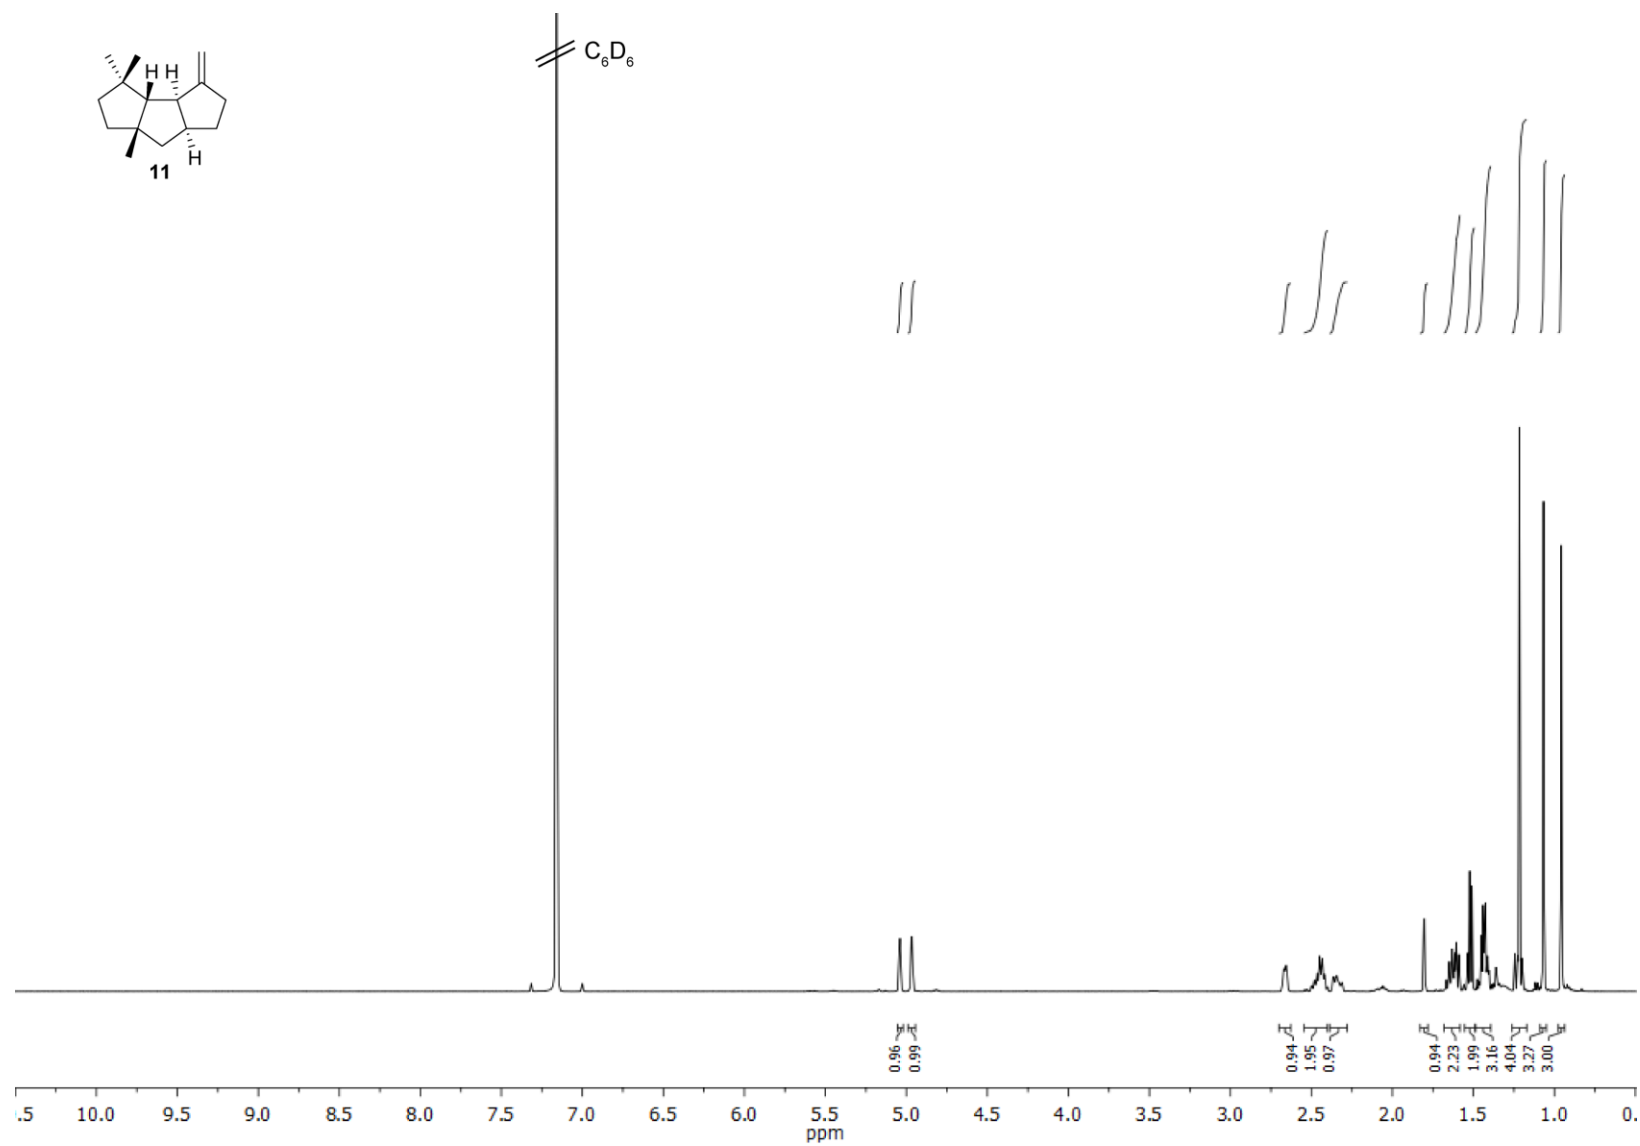

$^1H$  NMR spectrum (500 MHz) of **11**.

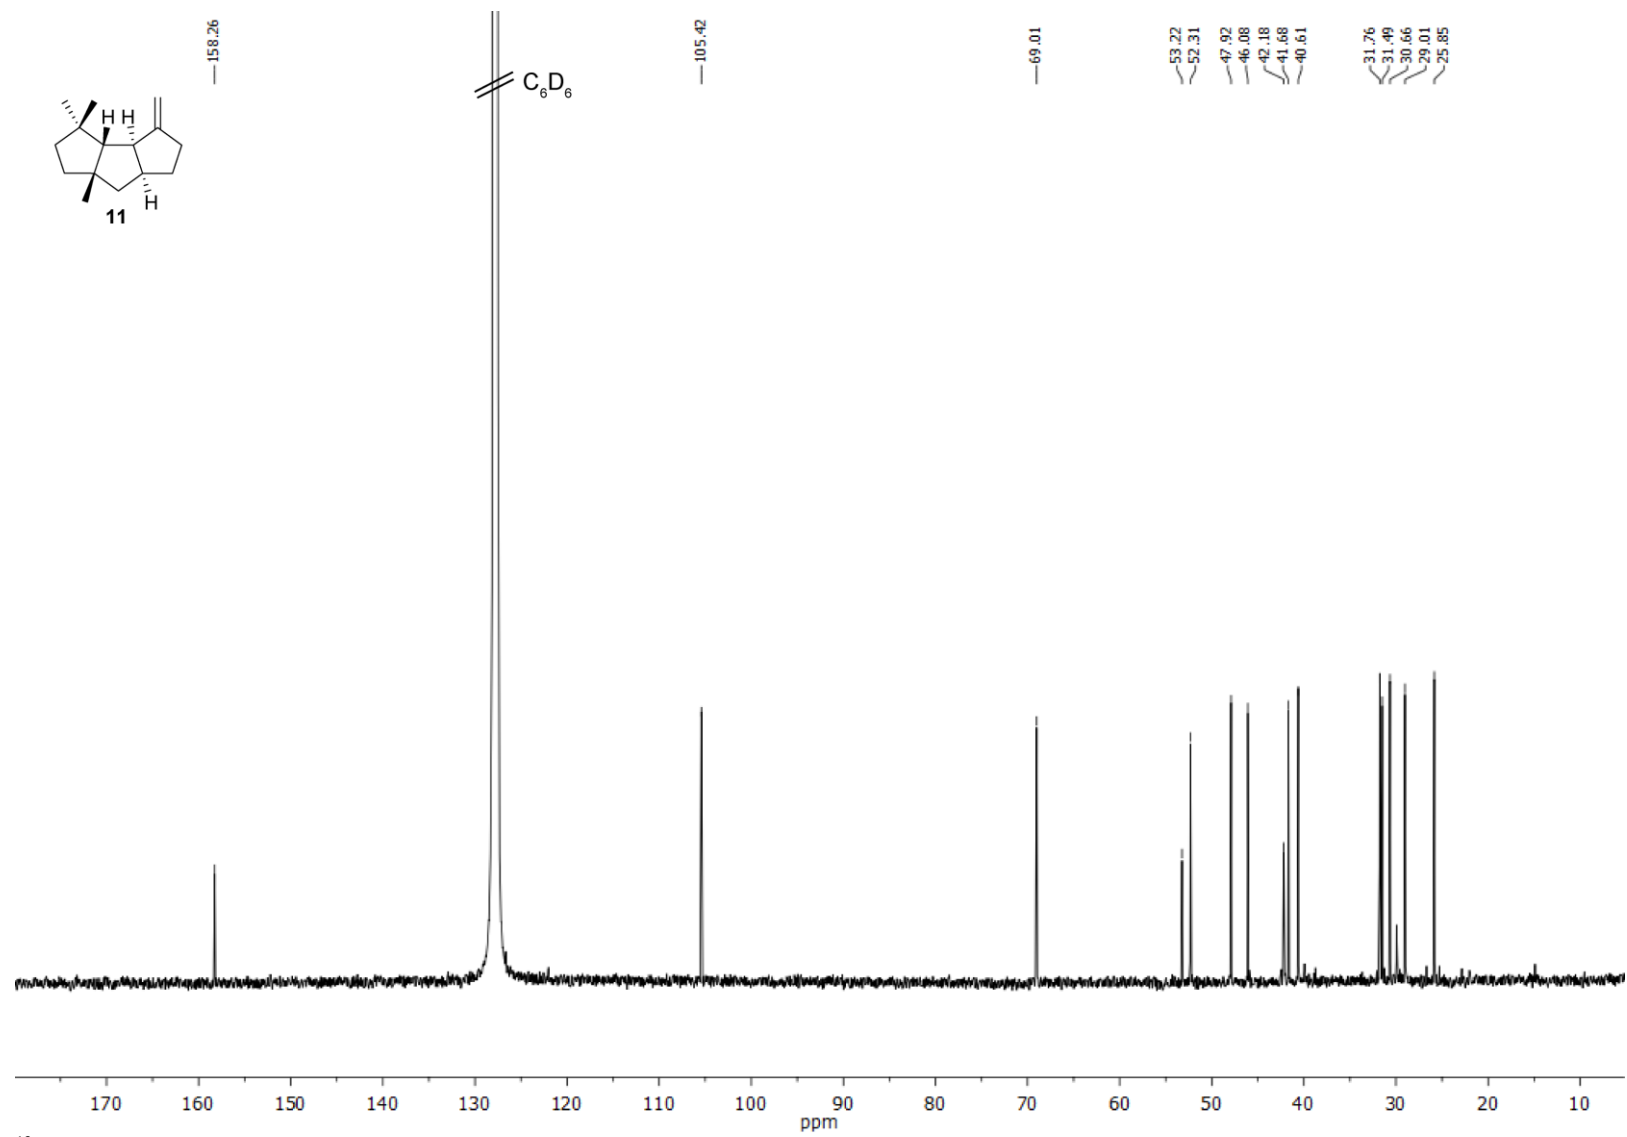

$^{13}\text{C}$  NMR spectrum (125 MHz) of **11**.

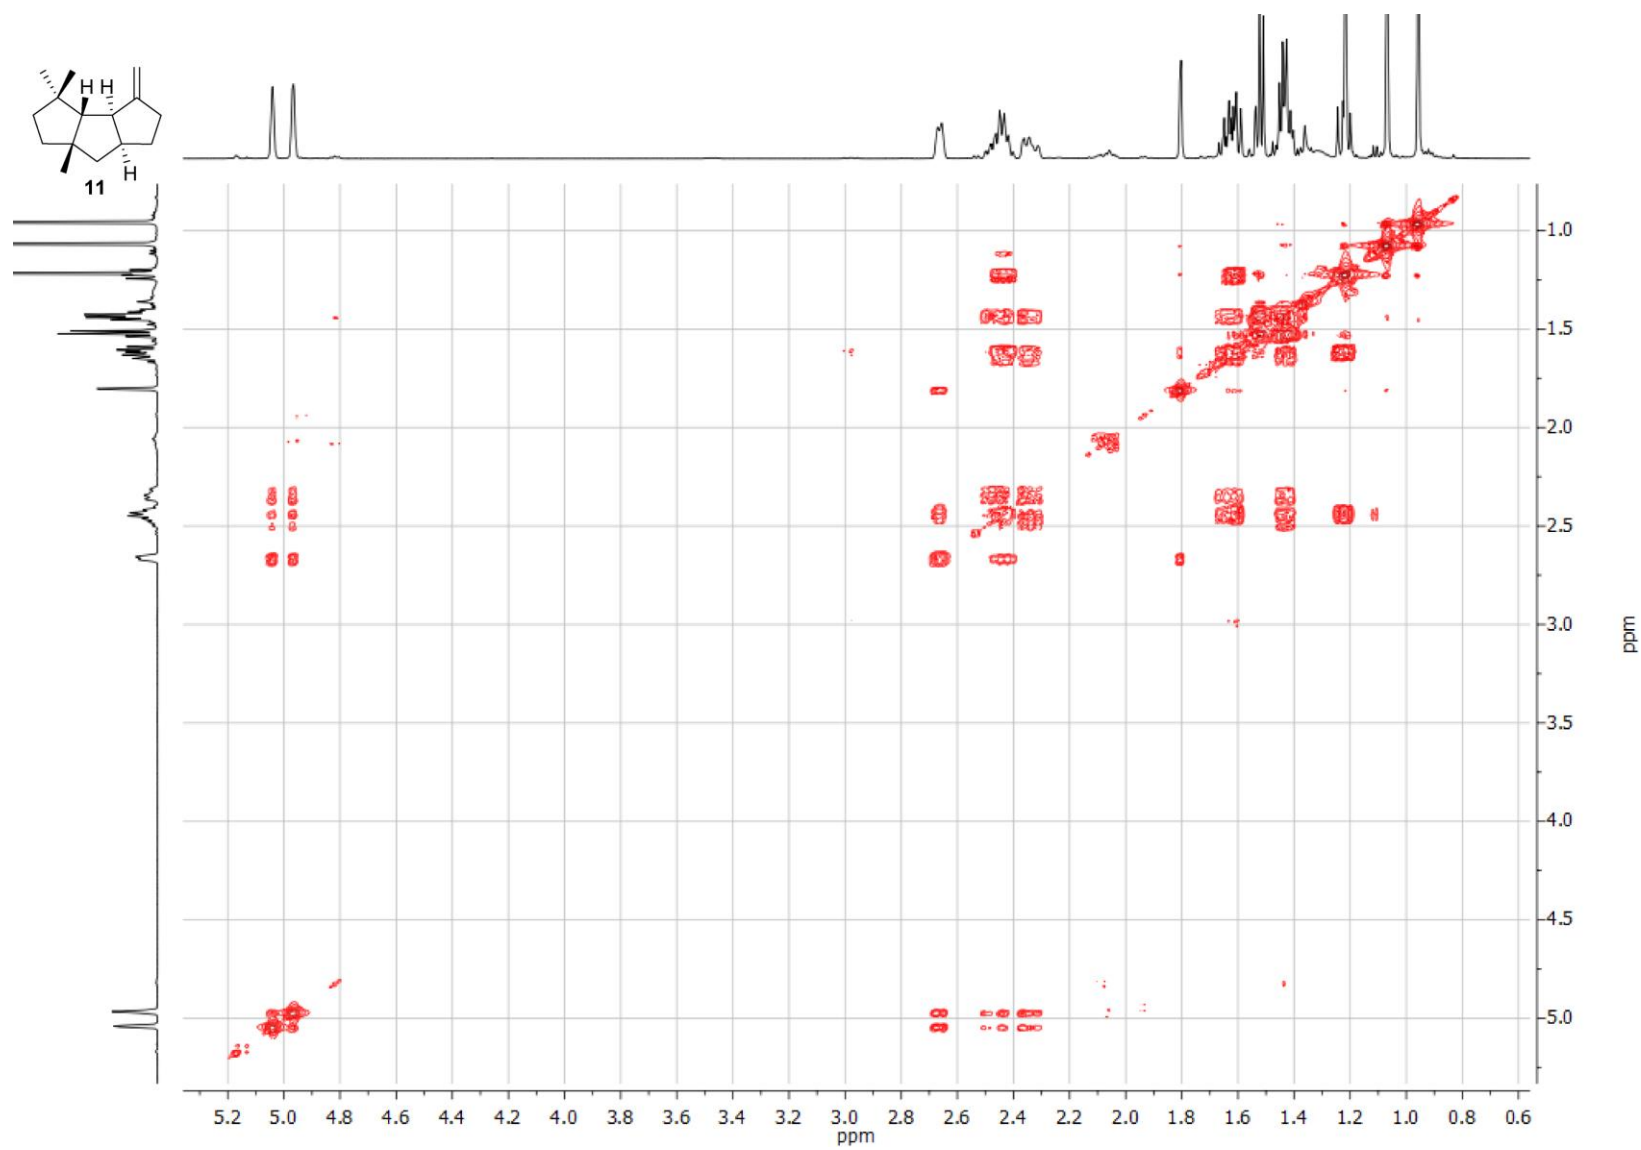

$^1\text{H}$ ,  $^1\text{H}$  COSY spectrum (500 MHz) of **11**.



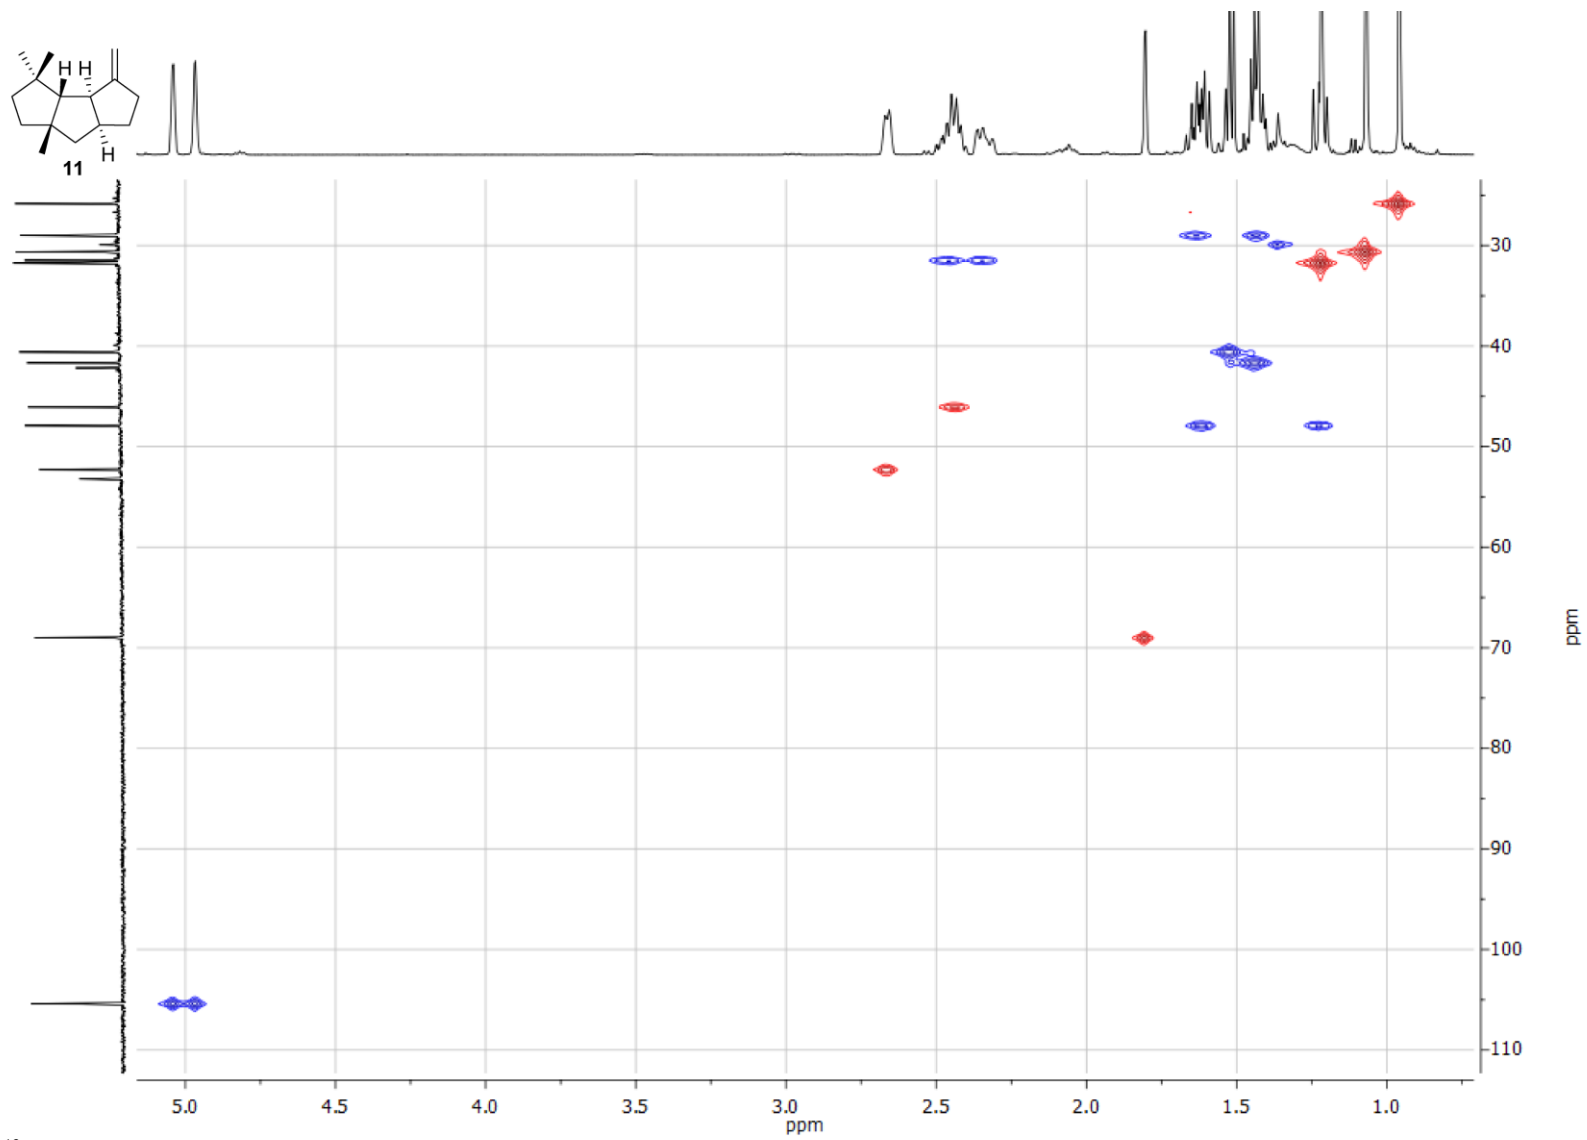

$^1\text{H}$ ,  $^{13}\text{C}$  HSQC spectrum (500 MHz) of **11**.

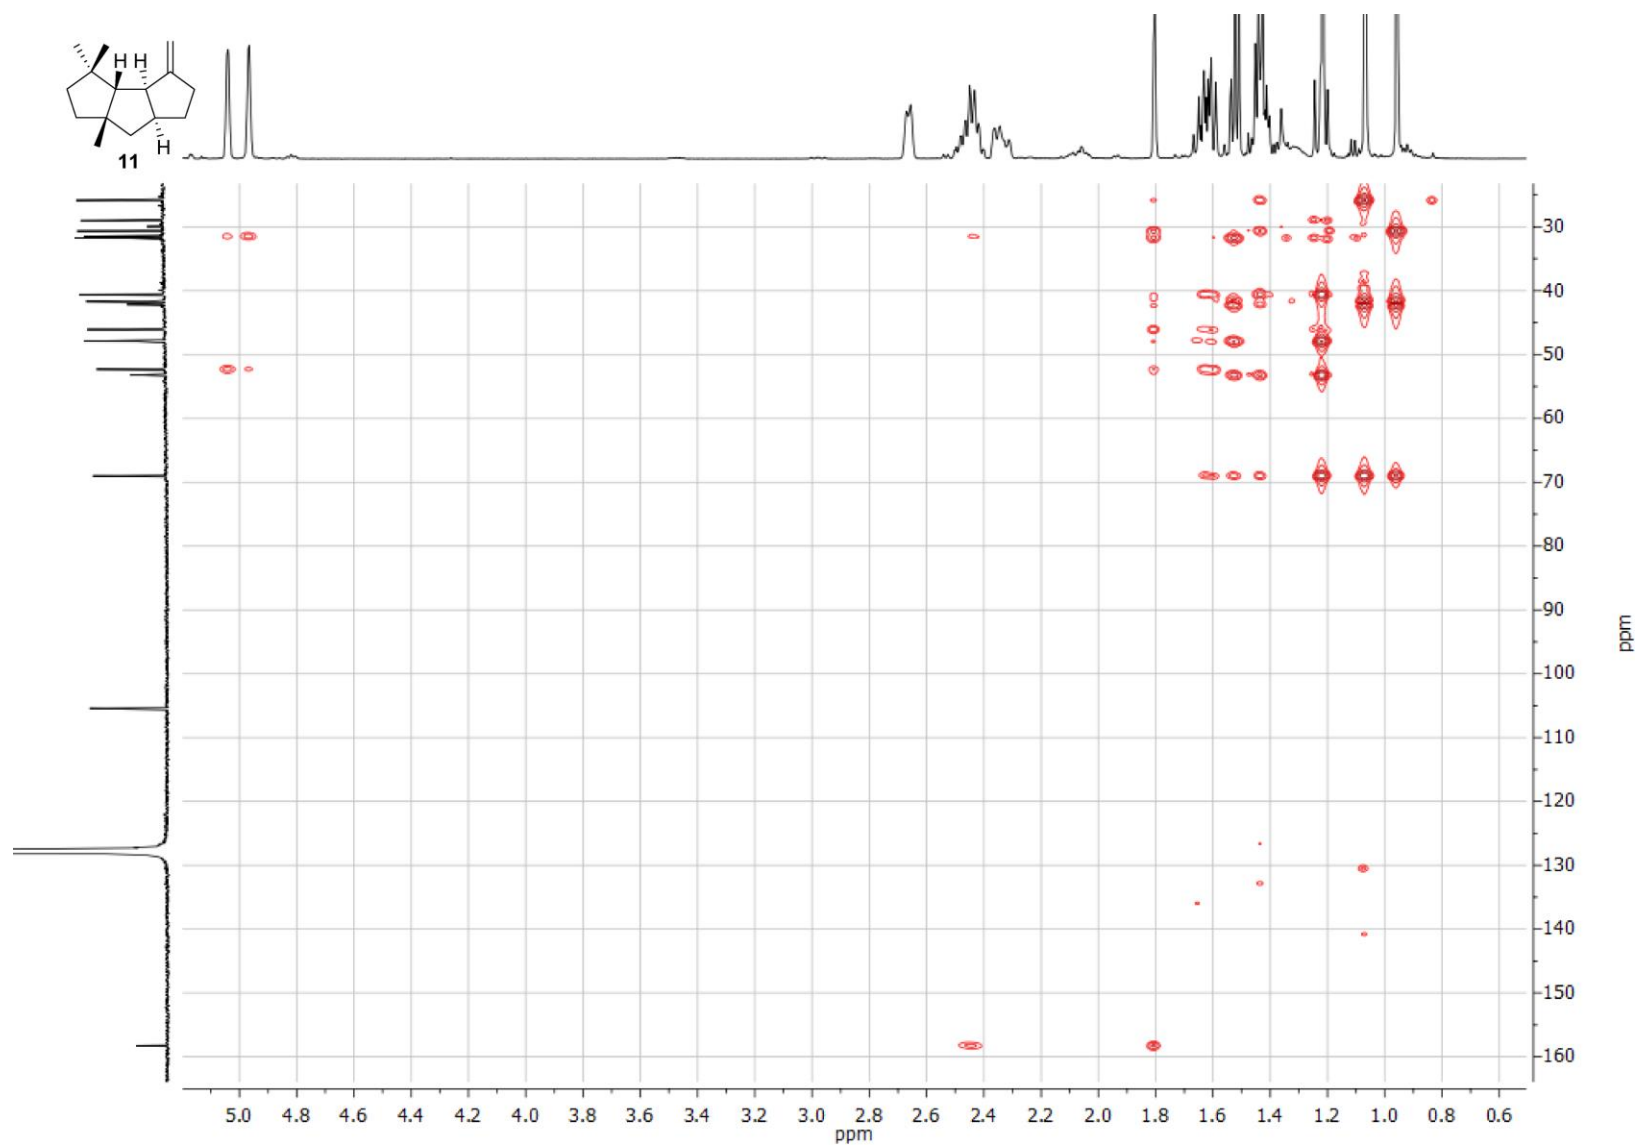

$^1\text{H}$ ,  $^{13}\text{C}$  HMBC spectrum (500 MHz) of **11**.

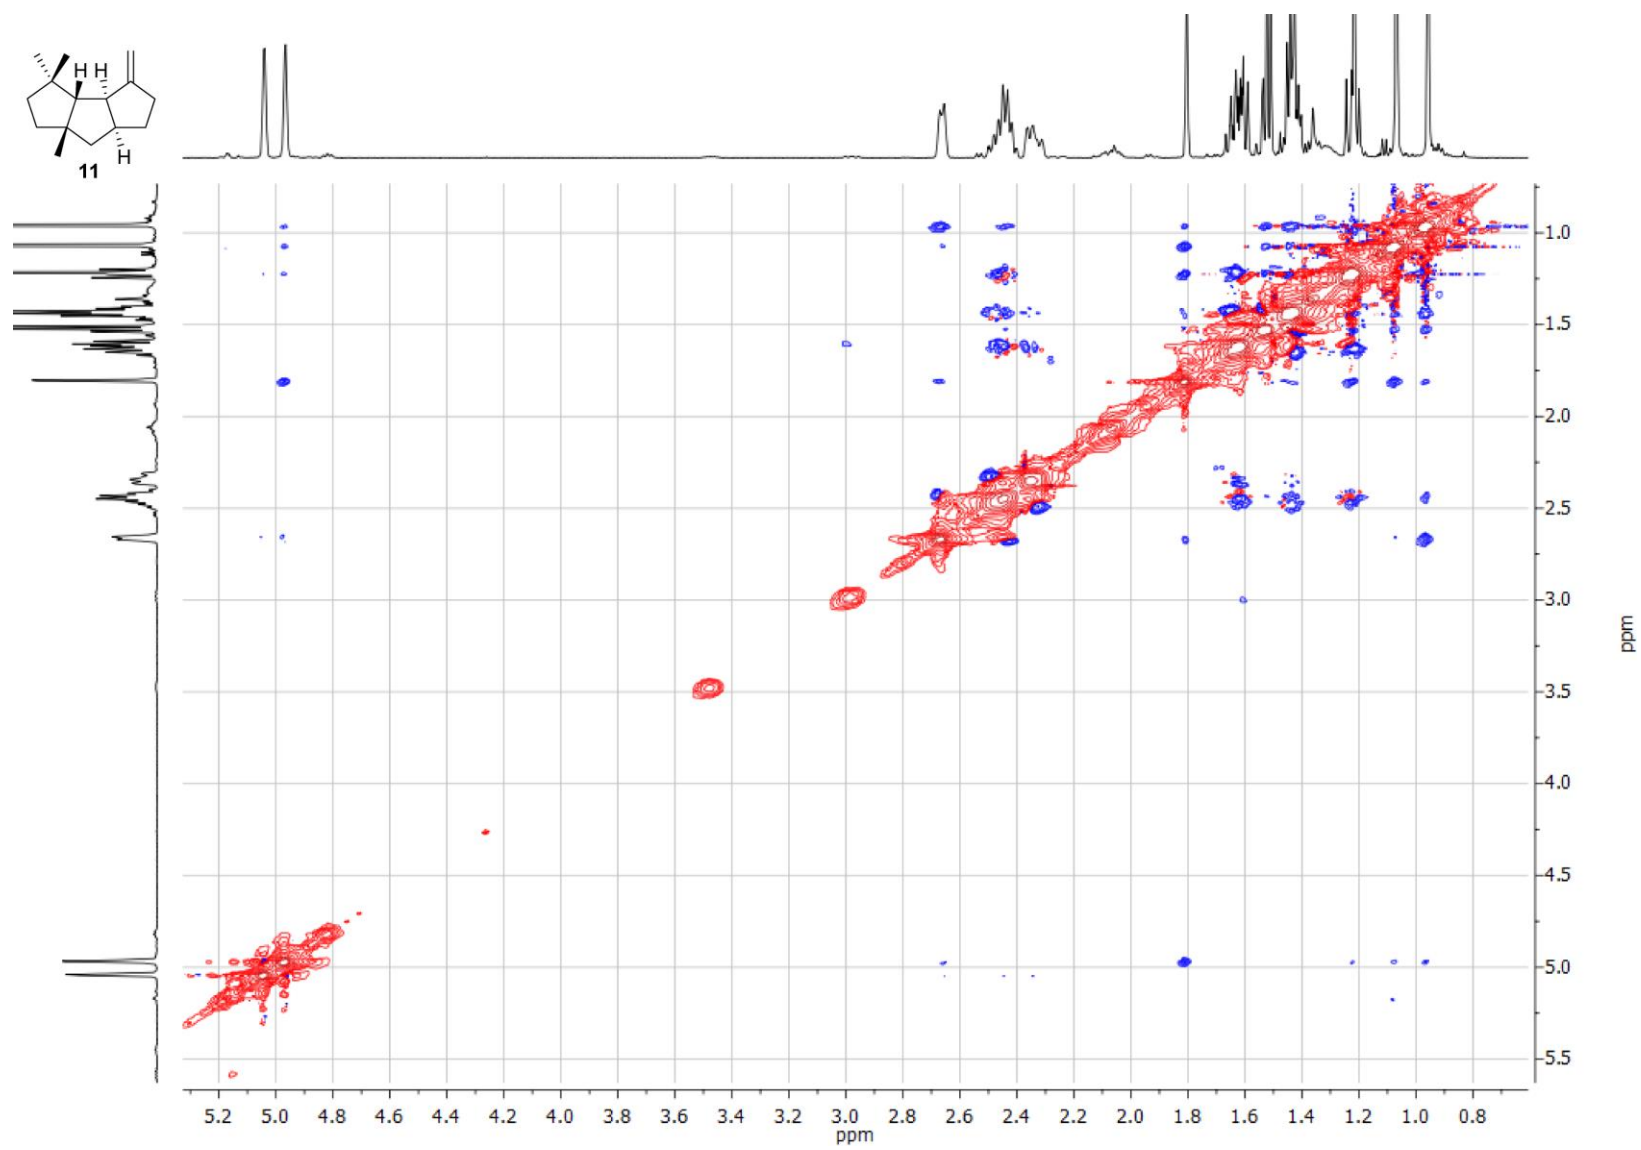

$^1\text{H}$ ,  $^1\text{H}$  NOESY spectrum (500 MHz) of **11**

## Supplementary Note 2 – Sequences

### Capnella imbricata mutS sequence.

```
>C. imbricata mutS
ATACCTATGCAATATTTTAACTTAGCGGAGGAGAATTATTCTAAGTATGGATTATCAGTAATCCAGCTTATCCAA
ATTGGTAAGTTTTATGAACTTTGGCATGAGCCCGATACTTTTAGTAGGCACCAAGTTTACTTTCAAGCCGATTTA
TTAGTTGATCCATCCAGGCGAAGTGGGCCTTTGGGGGTAACGCCCCGATTGAACAAGTTGCCTCGTTACTTGAT
ATGAGAATAACGTCTCCCGGTAAAAGATCCTTGCTTCAAATGGGGTTTCCAACCTATTCCCTTACTACCCACTTA
AGTACTCTGCTGGATAAAGGTTGGACTGTTATCGTTATCGATGAATTAGTCACTGGTAAATCCGGGCCAAAACAA
CGCGCAGTATCTCAGGTTTATTCTCCTAGTTGTAATTTAGAGGAATGTTTGAATTGCCCTATGTGTTATCAATT
TATTTTTCTCGAGATGACTTATTAGGTATCACTTTATTTTTCGGCCATGAATGGGCATAGTATAATGTTCCCGTC
TCCTGGACGGACCGAGACAAAGTAGCCCCACTATTAATCGGCTATCATATTAGAGAAAATAGTGATTTGGGCCAC
TTGGGGGCTGGCTCGGATATTTAATATATAGAATATATGATCTATTAATTGATTGGAATCTATTCCCCACTGAG
CCCAATGCTAAAATTGAAGTTATGG
```

### TC Sequences

All characterized sequences are given as nucleotide sequences that are codon optimized for *E. coli* as used in this work and as amino acid sequences of the resulting proteins.

```
>BaTC-1_nucleotide_codon_opt
ATGGTGTTTAGCAAACCGATTTCATGCGCCGAAAAAATGGGTGGAAAAAGGCAAAGGTCTTTTAGATGAAGAAGTT
GATGAGCAGTTAGAAGGCTTGCAAGAAATTATTGACACATTCATTCAGTGCGATCTGTGTGACGAGACCACCGTG
CGTAAATACCGTGGTAAATTGCGTCCGTATAACTTTACCCGTAGCTTAAATCCGATTATTCTGAGACCAAACTT
GGCCGTGAAGTATTCAAAGCCCTGGCGCATTTTACAATGGGGATTTTTATCGCTGATGACATTATGGAAAAACAA
CCAGAGGAGGAAATCCGCAAGATGTGCACCACGTTTGGCCACTTGGACGCAAAGTCTCGCCAGAGTTTTCCGAGC
TTTCCGGCGATTGATGATATTAAGGAAGTGGTGGATGCGAGCAGCGTTTCTAAAAATGTGGCGGGTCCCATCGTA
TTTCTTGAACAGTTTCTTAACAAACAGGCAAGCTTGCTCCTGAGCCATGGTGATTTTTCTGCTGTCTGATGTCAAG
GAATTCGCTTACGGGGCTATAACATGATGGCCATTTATTTTTCTGCGCGTTTTAGAAGAGACTGAGATTCAAAA
AAACCGGGAAGCATCGAAGTAATTTGGCGTCGTGCGTTCGGCGGTTGCGTCCCATTTTATTACTACCGCTGAA
ATCTTTAGTGGTGCATCGGCAAACCTGAAAGAACATTATACCGCTCTGACCGAACTCTACGTGCTGGGAGGCATT
TATGTGGCAACCTTAAATGATGTATTCTCCTATTATCGCGAGGCGCATAACCGTGGCGGATAATGTTGTTAAAGCA
ATGGTATCACAGAAAGAAGTGGAAACATTGGAAGAGGCCGCCGCAACGTTGCTGAGTTTTTTAGATAGCATTATG
CAGTACCTGTATGAAAAAGTCAAGAACTGCAACGCAAAGACCTTAAACAATCGTGAACCTCCACGTTTGCCTTGAC
TATGTGGGCCGATGACTGTAGGTTCCGTATATGCCATTTATTGCGCGTTACAAAAGATACAACACTTTTCATAT
TACCTGGAAGAAGTCAAGGAAGACCAGTTATCGTTCGTGGCTGAGCAAAAAGGGTGAAGTACGGCACACGGATGCTG
AAAAATATCCTTGAGGTCATTCACCAACGCATGGCAGACGGCCAGATGGAAGCATTGGCCGGTGCATTTCCGTAT
TGCGGGAAATTTCTTGAGATTGTAATTCCGGATACTATTTGCTGTACCTCTAGCATCGTGTA
```

```
>BaTC-1_amino_acid
MVFSKPIHAPKKWVEKKGLLDEEVDEQLEGLQEIIDTFIQCDLCEDETTVRKYRGLRPNFTRSLNPIIPETKL
GREVFKALAHFTMGIFIAADDIMEKQPEEEIRKMCTTFAHLDAKSRQSFPSFPAIDDIKEVVDASSVSKNVAGPIV
FLEQFLNKQASLLLSHGDFSLSDVKEFRLRGYNMMAIYFLRVLEETEIQKKPGSIEVIWRRAFGGCVFPYLLTAE
IFSGAIGKLKEHYTALTELYVLGGIYVATLNDVFSYREAHTVADNVVKAMVSQKEVETLEEEAANVAEFLDSIM
QYLYEKVEELQRKDPNNRELHVCLDYVGRMTVGSVYAHLLPRYKDTTLSYYLEEVKEDQLSSWLSKKGEYGT RML
KNILEVIHQRMADGQMEALAGAFPYCGKFLGVVIPDTICCTSSIV*
```

>BaTC-2\_nucleotide\_codon\_opt

ATGACGAAACCATTTGAGGTTACCGCTCCAACGCGTTGGGTTAAATTCCATGCGCGCGTTCTGTCTCAGCCGCCG  
ATCGAGAACTTCATCCGTATGGAACAACCTGATCAACTGGGGCGTTGCTTGTGGAGTAACGAATGAAGCCGGC  
CGGAAATCCTTTCAAAGTTGAACGCATATGTGTATCTGCGCTGTATGTACCCGTTGGTGGCGGACGATGCGTGG  
AGCGCGGAAATGTTCCGCATTAACCTTACTTTACGACAGCCGGCTATATCGTGGATGACCGGATTGAGCGCTAC  
ACGATGGAAGAAATGAATGAACTCTGCGACGGATACGACATGTTAGAAAAAGAAGTTTCTAAATTTTCCGAAA  
TGCCCATCGATTGAAGAAATGCGGTGTGCGCTCCAGCATCTGAAAAATAAATTTTCTATCGCCGCGATCACGATG  
GTGATGGACTTTGTAAACCAATCAGCGTTATTTTTCTTACGTCAAGGCAAAACAAGCCGCGACCGTGTGATAAT  
TTCCGTAAGCGTCTGTCCAATGCAGTGACCATTTATTATCAGGCGGTCCGTAATAAGGTTAAAACGGGTTGCAA  
ATCACTGAAGGTGAAATGCTGTGGCGCCGTTGCTTCGATGTTTTGGCCGTACCTTCATATCTGGCGCCGAGAGC  
TTCACGCACGCCGTTGAAAAACAGGAATGGCCACTGGAAATGCTGTACGAATTGTACATGCTCGGCATTTCTGTAT  
TCCACAGTTATTAATGACCTGTATAGCTATCACCGTGAGAAGCTTGATGATTGTGATAATGTCATTAAGTGTGG  
ATGCAAGAAAACAGTGTCTCTAGCATTGAAGAAGCTAACGAAAAAATTTGTATGATCTTGGATGCCATCCTGCAA  
ATTATGTATGAAAAAATTGAAAAGGCAAAAGCGCAGTATTCCAAGTGCCCGAACTTCAGCGCTGTAGACTAT  
ACCGGCATCGTCTCTGCTGGATGGATTTTTGTCCATAACACGGCGCGCCGCGGTATCTTGAGAGCCCGTACCAG  
GTTGTCCTTCGTGAAATCGAAGACAAGGATATCCAGGGTGGCTTGAAAAACAAGAACGAGTTTGGTTGGCGCGTG  
GTACGCCATTTTATGGAACGATGAAGTCCGAGAAAGGCAAACCGGTTATGGATGCTATGTGCGGCTTCACAGAT  
GCCCCGAATATTCTTATCTGA

>BaTC-2\_amino\_acid

MTKPFVETAPTRVWKFHARVLSQPPIENFIRMEQLINWGVACGVTNEAGIRKSFQKLNAYVYLRCMYPLVADDAW  
SAEMFRINLHFTTAGYIVDDRIERYTMEEMNELCDGYDMLKEVSKLFPKCPSEEMRCRLQHLKNKFSIAAITM  
VMDFNQSAFLFRQKTSRDRVDNFRKRLSNAVTIYYQAVRNKVKTGCKITEGEMLRRCFDVLAVPSYLAPE  
FTHAVEKQEWPLEMELYELMGLILYSTVINDLYSYHREKLDDCDNVIKVVWQENSVSSIEEANEKICMILDAILQ  
IMYEKIEKAKAQYSKPELQRLLDYTGIVSAGWIFVHNTPRYLESQVVLREIEDKDIQGWLENKNEFGWRV  
VRHFMETMKSEKGPVMDAMCGFTDARNILI\*

>CiTC-1\_nucleotide\_codon\_opt

ATGTCCTGTTCCAAAGAGGTTTCGTTTCCCGGAAACATGGTCCAAGGTTTCAGTGAATTGCTTAAAAACACCACGT  
GATGAAGATATCTTTGGCTTCCAGGAACCTGATTAATGGTTGGAAGATTGTGGGGCGTCAGATGAAGCCAACGTC  
CGGAAGTACGAAGAAATTTCTGAACGTGTACTATGCAACCCGTGCCATCATTCCGATCGTGCCTGAAAAACATTTCTG  
TGTCGCGAACTGTGCAAAGTCAAATTCACTTCTTCATGACGACGTTTCGTTACCGATGATTTGATGGAGGAGCAC  
TGTAGTTTTGAAGATATGCGCAAAATCATTGCGGCGCTGAACCAGCTGAACGAGAACTTTCACTGGAGTTTAAA  
AAGGTACCGAGCATTAAAGAAATGAAAAAGTATCTTCAGTACATGAGTGATGAACGTGCGATTTCTCTGGTTACC  
GTGTGCATGGATTTTCATCAACCGTTGTACGCGCACGCTGCTCCAGCACGGTAATGTCTCCGATGACGTGGTTTTT  
GATTACCGCAAACGTTGTTTTATCACCGTGAGTTTGTGGCTGCAAGGCGTGGCCATGGTCAAACCGGATGGTGCA  
GCCCAGGATACCGTAGTCGATGTCTTGTGGACACGCTTACGATGGCCTCCCAAGCGCCTTCATCTTATATACC  
GAAGTCAGCTCTTTTAGTTTTGGGCAAACAGAATGCCACATCGCGGAACTTACTGAACTGTATTGTTTTATTTGGC  
CTGTATATGGTGGCAATTAACGATTTCTATTCTTACACTCGCGAGATGAATGATACGATCTTCTCGCAATCCGTT  
ATTAAAATTTGGCTGAAAAACAAAGAGATTAATAACTTTAGCGAAGCGGCGCCGAAGATGGTCGCCATTTTAGAC  
GAGATCTCTAAATATGTTTACCGTAAAGGTGAGAAAATGAAAGCCGAAAACCCGACCAATTCGAACTCCATGAG  
ATGGTTGACCAGATCGGTTACGGTGTTCAGGCAACTATTTCTGCACCATCACGTTTGTAAACGGTACAAAGAT  
ACGACAGCCATCAAATTTGGGTATTAAGAAGCTTAAAGGTAAGGAACTGAAACAGTGGCTGGCGGAAAAAGACCCG  
TACGGCTGGGATATTGTCAAGAATTTCTGGTTGATCACAGCATCGTAGCCAAGAAGCTTGTTCGACGTTATGCGC  
GGCGTAACCCACTGTTCGGACGATTCACTGTAAACAGCTTGAACAAATAA

>CiTC-1\_amino\_acid

MSCSKEVRFPETWSKVQWNCLKTPRDEDIFGFQELIKWLEDCGASDEANVRKYEEILNVYYATRAIPIV  
PENILCRELCKVKIHFMTTFVTDLLMEEHCSFEDMRKIIAALNQLNEKLSLEFKKVPSIKEMKKYLQYMS  
DERAISLVTVCMDFINRCTRLLQHGNSDDVDFYRKRCFITVSLWLQGVAMVKRDGAAQDVTVDVLWTRV  
HDGLPSAFILYTEVSSFSLGKQNAHIAELTELYCLFGLYMVAINDFYSTREMNDTIFSQSVIKIWLKNKE  
INNFSEAAPKMVAILD EISKYVYRKGEKMAENPTNFELHEMVDQIGYGVAGNYFLHHHVCKRYKDTT  
AIKLGIKELKGGELKQWLAEKDP YGWDIVKNFLVDHSIVAKNFVDVMRGVTPLSDDSLNLSLNK\*

>DgTC-1\_nucleotide\_codon\_opt

ATGTGGTGCAGAAAAGAAGTTCGTGTGCCCCGTCAATGGGCTGTGCTGGAGCAAGAGGTGTTAAAGGAGAAACCC  
GATCCGGAATTGGTTCGATATCGACGGCATGATCAAATGGATTACGGAATGCGATATCGTAGACGAAAACGTCGTT  
CGTGCCTATGTGAAGTTAGTGAACCGTACTACTTTTATTCGCCTGATTTATCCAATTCTTCCGAAAAGATAAGTTG  
TGTGTGCAAGCCTGTAAAATTTTCTGCATTTTCGTTATTAGCCTTTACTGCAGTGATGACCGCACAGAACTGGAA  
TGCGACCTGGATGATATCGTGAATAATGTGCGACGCATATGAAAATTTAAAGGAACCGGTTTTTCGAGATGTTTTCCG  
AAATTCGGACAATTAAGAAATGCAGAGTAGCTTAAAATTTCTGTGCGACTCGAAATTGATTTCCGCAAGTTGTA  
CTCTGTATGGATTTTCGTTAACAAGTTACCAGCTGCGTCATCGAATACGGTGAATATAGCGAAAACAGCCGTTCTG  
GATTTTCGTCGCGGTTTTCTGAATACGATTGAATTTTACCTGCGGGGTCTGGAGATGGAAAAGAAAATGCACCGC  
AAAGACACGAAAACAAGACTCTTTGGCGCCGTATTTTCGACGGTGGCCCCGCTGTTTTTTCTTCTTATGTAGAA  
ATTAGTAGCTTTTTCATTGGGCAAAGTCGAGGGGCACATCCCGACCATCTCTGAAATGTACATCGTTTCTGCTTTT  
GTCTGTATCATTGTGAACGACCTGTATTTCGTACAAACGTGAAACCATGGAATCAATCAACTGCGATAGCGTAATC  
AAACATTGGCTGTGCGATGAAAAGATCTCTTCGATGGAAGAAGCGTGCAGAAAAGTAAGTCGTATCCTGAACCGC  
ACAGTACAGTATATGTTGAAAAGTGCAGCGTGTCAAGCTTGACTATCCTAATAGCCAGAACGCGCACGTCCTG  
TATGAATACATCGCGCACGTGACTATCGGTTGGCTCTACATGCATGAAGAAGCAACGATCGGTACAAAGACAGC  
CCATGGCGTGTCTCGCTGACCGAGGTGGAGGAGGATAAAAATTCAGGAATGGCTGAGTTGCAAAGATAGCTACGGA  
TTCGAAGCCTTGAACAGTTCTGGCCTCAAACCCAAAGGCCGAAAATAATTATTGACGCGCTGGCGGCGACGAA  
ATTATTCATGGCGGTCTGATCAACGAATCCTCCTAA

>DgTC-1\_amino\_acid

MWCGKEVRVPRQWAVLEQEVLKEKPDPELVDIDGMIKWITECDIVDENVVRAVVKLVKPYFIRLIYPIILPKDKL  
CVEACKIFLHFVISLYCSDDRTELECDLDDIVKMCDAENLKEPVFEMFPKFPFIKEMQSSSLKFLSDSKLISPVV  
LCMDFVNKVTSCVIEYGEYSETAVLDFRRRFLNTIEFYLRGLEMEKKMHRKDTENKTLWRRIFDGGPLFFLPYVE  
ISSFSLGKVEGHIPTISEMYIVSAFVCIIVNDLYSYKRETMESINCDSVIKHWLSDEKISSMEEACEKVSRI LNA  
TVQYMFKEKVRVQLDYPNSPEAHVLYEYIAHVTIIGWLYMHEEGNDRYKDSPPWRVSLTEVEEDKIQEWLSCKDSYG  
FEALNQFLASNPKAEKIIDALGGDEIIHGGLINESS\*

>DgTC-2\_nucleotide\_codon\_opt

ATGTTTTCTGACAATGTGCGGGTGCAGGAAAATGGACGATTTTCGCACAAAAAATGCTTGCAGAACATGAGGAA  
GATAAGGAATTAATCGCATTAGACAAATTATTGTTGTGGGTGAAAGAAACCGGTTTGACCACCGAAGCGGCGAGT  
AAATCTGTCTTCGACAATCTGAACGCGTATCGTTATCTGCGCTGTCTGTTTCCAATCTGCCAGAAAGATCAGACT  
GGCAAAAACTTTTTAGCTGAATCTGCACTTTCTGGTGTGAGGCTACGTGATTGATGATACAATGAAAAATAT  
AGCGAAAAGGAAATGCGGGAACCTGATTGACGGTTACAATTTTCTCCAGAATCAGGTATCTAAGACGTTCCCGAAA  
TTGCGGAGCATCTCAAAGTTTGGAAACTTCTGGGTGAAGCCGTAACAAGTTTAGTCGTTCCGCAATTGTCACC  
GTTGTAGATTACGTGAATCGTACCACCATGATTTCTTTGGAAGCGAAATCTGCGAAGAAAGCGTTCTGAATTA  
CGTAACCGTCTGTCTAACGCTATTGCGGTGTATTTTAAACGCAATTTTCAAACAACTAAAACCGGCTGTAAAAT  
TCCGAAAACGAAATGCTGTACCGCCGTTGTTTTGATGCGTTAAGTATTGCAGTATATATGAGTACCGAAGTCTTC  
AGTAAAACCTCTGGTGCACAACAGATGTTGCCGACGAGCGAACTGTATAAGTTCTACCTGCTGAGCACGCTGTTC  
TGTGTTGTGATTAATGATCTGTATTTCATACGAACGTGACAACTGGACGATACCGACTCTGTAATCAAAGTATGG  
TATGCACAGAACGAGGTACGGATATGAAAGCCGCGACCACTAAAGTGAGCAAAATTTCTGGATCGTATCATCCAA  
CAGATGTACCTGTTTGTGAAAGAAGGTAAATCGTGCCATCCAGAGCTGAGCGAATGGTTTGAACGCATTGCCGCT  
ATGACGGTTGGTTGGATCTACATTCACAAATACGTGCTTTTTTCGTTATGTGTCGCTCCGTTCAAATCGCCGTG  
GTTGAAGTGAAAGATGAAATGATCCCGGATTGGTTGACAGAAAAGACGCATATGGAGAGACCATTGTGCAGAA  
TTCCTGGATGGTTTAGAATATCCTCATCAGAAAGATGTCCTGGATAGCCTGTACGGTTGCAATCGTCTGTAA

>DgTC-2\_amino\_acid

MFSDNVRVPEKWTISHKKMLAEHEEDKELIALDKLLLVKETGLTTEAASKSVFDNLNAYRYLRCLFPILPEDQT  
GKKLFLQLNLHFLVMGYVIDDTIEKYSEKEMRELIDGYNFLQNQVSKTFPKLPSISKVWKLLEARNKFSRSAIVT  
VVDYVNRRTMILLEGEICEESVLNRYNRLSNAIAVYFNAILSKTKTGCKISENEMLYRRCFDALSIAVYMSTEVF  
SKTLVRNQMLPTSELYKFYLLSTLFCVVINDLYSYERDKLDDTDSVIKVVYAQNEVTDMAATTKVSKILDRIIQ  
QMYLFBVKEGKSCHPELSEWFERIAAMTVGWIYIHKYVVFVRYVSSPFQIAVVEVKDEMI PDWLTEKDAYGETIVQN  
FLDGLLEYPHQKDVLDLSLYGCNRL\*

>ErTC-1\_nucleotide\_codon\_opt

ATGAGCATCTCACAATGGTTTTCTCAAAGAAGTTCGCGTTCCGAAAAGAGTGGTTCGAAGTATCATTTTCGATATC  
GTCAAAGAGCCGATCGACCCGGAATTGTTCTCCGAGGACGAGCTGTTTCGATTGGGTGGAAGATCTGGGGCTGACA  
GATGATAAATCCGTCGTTACCAAATATGCACAACGCACCGGCGCTACCTCTTCTGCGTCTCCATATGGTCTTC  
TTTCCGAAAATTTCCCTGTTTTAAAAAATTTTTAACTGTGGGCCATCTGGTCCCGTCTGTTGTTGTTACCGAT  
GACTTCTTGGAGGCGACCGAGATCGAAATGCGTCAGGTCTGTGATGGATTTCGAGTTCTTGGCCGCCAGATT

CGGGGACAACCTGCCACAGTTCCTACGATTGCGGAGATGAAACAGAGCCTGCTGTTACAGAAAATTGACGAAAA  
CTGATTCGGCACACGATTACCTGATGGATTTTCGCTAACAAACGTAGCCAAAAGTATTATTCAGCATTTCGAGTATT  
CCGATCGAATCGGTGAACGAATATTGGCGCCGTCTTGTCTGCTGTCAGTCTGTATTATGCAGGGGTGGCATT  
GAGGTGAAACATTAGTGCCTTCTATAGCGAAGACGTCTGGACCGGCTCTTACCCTGGCCTATTTACTGTGG  
CTTCCATGCCTGGAGATTCTGAGCGGCGCCGTGGAAAAACCACCGAACACCTGTCACTGATTAACGAATTATCT  
TTTTTAGCCACCTTTAGCGCACGCGTAGTGAATGATATCTATAGCTATAACCGTGAATTGGTACTCGAACACAAA  
CCGGTTTCGATGGTGGCGCGTATCGCCGAATCGAAGGAGGTTACGACAGCGGACGAAGCGCTCATTAACAAACGTT  
GAAATCCTGGGTGCGATCGTGAAGGTAATGTACCAGCGTATCGAAAAAGCAAAGCAGGAAAATCAAACCAACAAG  
GAACTGTGCAAAAATGGCTGGATAATATTGGCTCGGGACGATCGGGCTCCACTTTTGGCACCATTATATTTCCCGC  
TATACCTCGGCGCCGTGCCGTCTGTCTTTCGTGGGAGTCGAGGAGGATGAATTGAAGGAGTGGCGCAAATGCTCT  
GAAGAAGAACCTCCCAAAGAAGTGTTCGGTGTCTTGGACCACTCCAGATCGCGAAACGCATCAACGATGCA  
ATCATCTCCGGCGTCTGTGCCGACGCAAGTTAAAAACGTCTGTGTACCGATTAA

>ErTC-1\_amino\_acid

MSISQMVFSKELRVPKEWSKYHFDIVKEPIDPELSEDELFDWVEDLGLTDDKSVVTKYAQRTGGYLFRLRHMVF  
FPKNSLFKKLFLKLAHLVPSLFVTDFFLEATSEIEMRQVCDGFEFLAGQIRGQLPQFPPTIAEMKQSLLLQKID EK  
LIPHTIHLMDFANNVAKSIIQHSSIIPIESVNEYWRRLVVVCSLYYAGVAFEVKHSVRSYSEDVWTVGVFTVAYLLW  
LPCLEILSGAVGKTTEHLSLINELSLFLATFSARVVNDIYSYNRELVLEHKPVSMVARIAESKEVTTADEALIKNV  
EILGAIKVMYQRIEKAKQENQTNKELCKWLDNIGVGTIGVHFWHHYIPRYTSAPCRLSFGVVEEDELKEWRKCS  
EEPPKELFPVLLDHSQIAKRINDAIIISGVVPTQVKNVLTCD\*

>ErTC-2\_nucleotide\_codon\_opt

ATGTCGGGCAAAAATTGTCCGTGCTCCATCGAACTGGACTACCCACATAAAAAAATGCTTAAAGAAGACGAAGAC  
CAGGAACCTGATTTGCATTTGATAAACTGCTCAGCTGGGTGAGCGAGACAGGGGTGGGTACGGAAGAACAGGCAAAA  
ATCGTGTTCAAAAAATGAACGCGTATTTCTACCTCCGGTGTCTTTATCCAGTGTCCCTCGTCCGTAACAAATCC  
ATGAAAATTTTCCAGTTGAATCTCCACTTCTTAATTCTGGGCTACATTATCGATGATGCTATCGAAAACGTACAC  
GAGAATGAAATGAAAGAGTTAATCGCGGGTTATAATCTTCTGCACTCAGGTGTCCGAGACGTTTCCCAATTTT  
CCAAGTATCTTTGAAATGAAACAGCTGCTGGGAAATATGAAGAATGACTTTTCCAAAAGCGCAATTACCACGATG  
TTCGATTACGTGAATAAACTACACTGATTCTGCTGGAAGAAGGTGAAATTCGAGAACACAACGTGCTGAACTAT  
CGTAAACGCTTGAGCAACGCAGTTGCTGTATATTTTCGATGCTCTGTTGAGCAAGACCAAAACCGGGTGCAGAAATC  
TCAGACGGTGCATGTTATGGCGCCGTTGTTTTGATGCACTGGCTATCGCTGTGTACATGTTAACGGAGGTATTT  
TCTAAAACCCTGGTTAAGAATCACACGTTGCCGGTACGCAATTTTATAAATTTTACCTCCTGTCTATTTCTGTTT  
TGCGTGGTTATTAACGATTTACATTCTTACGAGCGTGACAAATTTGGATGATACCGACTCCGTGGTTAAAGTCTGG  
TTCAAGGAAGGATCCGTGGCAAATATGGAAGCTGCGACCTCCAAAGTTTCCAAGATCCTGGATGCCATTATCCAG  
CAGATGTACCTCTTCGTGGAAGAAGGCAAAGCGCGCCATCCGGAACCTCAGTGAATGGTTTGAACGTATTGCGTAT  
ATGACCGTGGGTTGGATTTACATCCACAAAACCGTGGTACCGCGCTACGTGAGTAGCCCGTTTCAAATCGAGGTC  
GTGGAATTCACGAGAACATGATTTCTAACTGGCTTCTCAAGAAGGACGCTTACGGCCAACCGGTGGTGCAGCAG  
TTTTTAAAAAATTTGAACGACCCTCAAAGAAAAACATTATGCTGTATGACGAGTGA

>ErTC-2\_amino\_acid

MSGKIVRAPSNTWTPHKKMLKEDEDOELIAFDKLLSWVSETGVGTEEQAKIVFKKINAYFYLRCLYPVLPDPKS  
MKIFQLNLHFLILGYIIDDAIEKYNENEMKELIAGYNLLQSQVSETFPNFPSIFEMKQLLGNMKNDFSKSAITTM  
FDYVNTTLLILLEEGEIAEHNVLNRYKRLSNAVAVYFDALLSKTKTGCEISDGAMLWRRCFDALAI AVYMLTEVF  
SKTLVKNHTLPVSEFYKFYLLSILFCVVINDLHSYERDKLDDTDSVVKVWFKEGSVANMEAATSKVSKILDALIQ  
QMYLFVEEGKARHPELSEWFERIAYMTVGWIYIHKTVVPRYVSSPFQIEVVEIHENMISNWLLKKDAYGQRVVQQ  
FLKNLNDPQKKNIMLYDE\*

>HcTC-1\_nucleotide\_codon\_opt

ATGGCATTTCAGTAAGCCGATTTACGCGCCTAAAAAATGGGCTGAAAAAGCCAAAAGGAGTTACATCAATGAACGAA  
GAAAAACAATTAGTGGGCATGGATGAACTGATTAAGTGGGTCGCAGAGTGTGAACTGGCAGGGGAAGCCACGGTG  
CGGAAATATTGGGATACGGTGCGCCCTTATCATTTTTATGCGTTGCTTGTATCCAGTGTTCGGGACAACATCCTG  
TGCAAGGAATTTTTTAAAGTGTGTTACATGCCAGTATTTCTATCTATATTGCTGACGACCAGTTGGAAAAACAG  
AGCCGTGAAGAAGCTAAAATTGCATGTGCCGCGCATGCACGTATTGATCAGCAGAGCACGAAGCGTTTTCCGAAT  
CTGCCCACCATCCAGGAGATGAAACAGATCCTTAGCACGTTTTCTACGCCGTCGATTGTTGGCCCGACAACGATG  
TTTGTGACTTCGGCAACCGCCTCGCAAAGGTGCTGCTGCTGCATGGTAATTGGAACGGGAACGTGGTGGCGGAT  
TTTCGTCTCCGTAATTCTAACTTAGTTAGTATGTATTTTCAAGCGATCCAGGCCGAAAAGACTCCGAATAAAAAG  
AACACCACGTTAGAGACCCTGTGGCGTCGGATCTTTGGTGGTGTGCGAGCCCTTACTCTTCCCTGGCCGAAATC  
GCAAGCGGGGCAATTGAAAATTCAAAACAACACATTGCGGTCATCACTGATATGCATCTGCTGAGCGGCTTGTTT  
TCGACCACAATTAATGATCTGTATTTCATATTTCTTGGAGAAGTCAAGTATCTGCGACAATGTAGTCGCAGCCCTG  
CTGCATGAAAAACAGCGGAAAACGTGAGCGAAGCCGTTGATAAAGTTGCACAGATTCTGGACGCCATTTTGAAA  
CTGATGTATAAAAAAGCGGAACAAATTAAGTGCAGTTCCCGGATAATCGCGAGCTGCGCGATTTTTTCGATTAC  
GTTGGTCAGGTGACAGTGGCTGGTACTATTTACACGAGTGCACATTACCCCGTTATCAGGGTTCGCCCTGGCGT  
GTACATCTGGAAGAGATTGACGAAGACGAAATCCCGAAATGGTTAAGTGAAGAAGGGCAAATACGGCTCTAAAGTC  
ATGCAGGAGTTGATGGAATTAGTGCAGGAACGCATGGCGGACGGTAAAATGGACGCGGTTACGGGAAATTTCCG  
ATTAACGAAAAATACGTGGCAGAAAAAGAAGATGGCCTGTATAAAAATTATTTAA

>HcTC-1\_amino\_acid

MAFSKPIYAPKKWAEKAKGVTSMNEEKQLVGMDELINWVAECELAGEATVRKYWDTVRPHYFMRCLYPVFPDNIL  
CKEFFKVLHLSISIIYIADDQLEKQSREEAKIACAHAHARIDQQSTKRFPNLPITIQEMKQILSTFSTPSIVGPTTM  
FADFGNRLAKVLLLHGNWNGNVVADFRLRNSNLVSMYFQAIQAEKTPNKKNTTLETLRRIFFGGVAAPYSSLAEI  
ASGAIENSKQHIAVITDMHLLSGLFSTTINDLYSYFLEKSSICDNVVAALLHEKTAENVSEAVDKVAQILDAILK  
LMYKKAEQIKLQFPDNRELDRDFDYVGVQVTVGWYYLHECALPRYQGS PWRVHLEEI DEDEI PKWLSEK GKYGSKV  
MQELMELVQERMADGKMDAVHGKFPINEKYVAEKEDGLYKII\*

>HcTC-2\_nucleotide\_codon\_opt

ATGGCATGCTCCAAAGAGATGTACATTCTTAAAGAGTGGACGAAAATACCACCACGACATCGTGAAAAGAGGTGAAA  
CGTGCAGACCTGGAAGCCGATGATGAGGTGCGGAAATGGGTGGTGGGTTTAGGCCTGAGCGATAAACCGGCAACC  
GAGAAATATATCGATAGTACTCGTCCTTATCATTTTTATGCGCTGCATCGCTGTCTTGGTGCCATCTAATCCACTG  
TGTCGTAACATTTTTCAAACCTGGCAGATCTACGTCACGGGTCTGTTTCGTATCCGACGACTATCTGGAACAGACC  
TCCCTGGCGGAGGTAGTCCAAGTGAGCGATTCTTTTCGATATGCTTAATGAACAGATCAGTGAGCGTTTTCCCGTG  
ATTCCAACCCACGCGCAAATTTATGCGGTGCGTTAAAATCAACGAAAAAATTGATCCCGCATGTGCTGGTCCAGATC  
GATTGGTTAAATACCATTGCTAACGACCTTCTGCAACACGGCGATTTTTTCAGAAGATGATGTATGGGATTTTTCGG  
TGTCGTATGTCGGCGTGGATCCGTGCGTATTTTATGAGGGTGAAGGAGCCAGGTCCGAAAAGTAAAAGTTACG  
ACCGATGACTTTATGTGGCTGCGCATCATTGATGGAGGCGTCCGCCCCGTTCTTGCTGATTAATGAAATCCTGGTG  
GGCGAGCTGGGTAAGTGCAAAGGTCATGTTAACTTATTACGCAGCTGTACATCCTCTCTAGCTGCGTTTTGCGTA  
CTGATCAACGATTGCTATTTCGTATCATCGTGAAACCGTAGTGACCATCTACAACACAATTAAGTCAATTTAGAA  
AATAAAGAAGTGTGGAAGTGCCAGATGCGGTTAGTAACTGTTGCAGACGATTAACGCGATCATTAATAACATG  
TATCAGACCATTGAAAAACGAAACATGAATATCCGGATAACCTGATGCTGAACAACTGCTGGATGCTATCGGT  
GGTGCAGCGCGGGTTGGTTCTTTGTCCACGACAAAGTCTTGCCGCGTTATCAGGCGACCTCTTGGCGCTTCTCA  
CTGGTGAAGTCAAGAATAAGGAGTGAAGAGTGGCGCAAAGCGCTGATGAAAAGCCCTCAGATCTTGTACAA  
CCTCTGCTCTACCGCTTTAATGCTAAAGGCAAAGAAATCATTGATGCGCTTGCTTACGTCCCCAAACGTAGTCCG  
CGTATTGTGCCAGAGTGA

>HcTC-2\_amino\_acid

MACSKEMYIPKEWTKYHHDIVKEVKRADLEADDEVAKWVVLGLSDKPATEKYIDSTRPHYFMRCIAVLVPSNPL  
CRNIFKTIYVTGLFVSDDYLEQTS LAEVVQVSDSFDMLNEQISERFPVIPHTAQIMRSLKINEKLI PHVLVQI  
DWLNTIANDLLQHGDFSEDDVWDFRCRMSAWIRAYFDGLKSQVGPVKVVTDDFMWLRIIDGGVGPFLLINEILV  
GELGKCKGHVKLITQLYLILSSVCVVLINDCYSYHRETVVTIYNTIKVILENKEVSEVPDAVSKLLQTINAI IKYM  
YQTIIEKTKHEYDPNMLMLNKLDAIGGATAGWFFVHDKVLPYQATSWRFSLVEVEEMELKEWRKSADEKPSDLVQ  
PLLYRFNAKGEIIDLALAYVPKRSRRIVPE\*



>HcTC-3\_nucleotide\_codon\_opt

ATGAGCTGTAGCAAGGAGGTGCGCGCCCCTCGCAAATGGGTACAACGCCAGCGGGAAATGCAAAAAGGTGAAAAGTA  
GATGACAACCTTGATTTCCATGGATGAGCTGATTGAGCTGGTTCGTTGAGTGCAGGCTCTGTGTGACGAGGCTCCCGTG  
CACAAAATGTATGAACGTACCAACACCTATCAATTCATGTGGACGCTGATCCCTACAGTACCTAGCGATCAGTGG  
CAATTCGAGATTTTTAAAACAGCTTGCACCTTTCTTTGCGCACTGTTCTTGGTTGACGATGCGGTGCGAGTCATAT  
TCTGAAAAACAGATGAAAGAGATGAGCGACGCGTATGATATGTTGGAGAAAACAGGTTTGTGAAAACCTCCCGTGC  
TTCCCTAGTATTAACGAGATGAAACAGAGCCTGAAACACCTGAAAAATCCCTTTGATATCGCTTCAATTACGTTT  
TGCATGCATTATGTGAACAAAATTGCGAGCGTGTAGTCAATGAAGGGAGCACACCACAGAACGTTGTCTATAAC  
TTCCGCCGCCGACCAGCAATGCCATTTCAATTTCCCTTTTCAGGCGGTTTTGATTAAAGCTAAAATTAGGGAGTAAC  
GTGACCGGTGACGAAATGCTTTGGCGCCGGGTGTATGATGGCTTAGTGTATTTTGTCTACCAGTTCGGAGAACTG  
GTCCTGGGCTGACTAAAAATACTGAAAAATACATGACGGTCATCACGGAATTACGCCTGTTGGGGTGTCTGTAT  
TGTATTGTAATTAACGATCTCTATAGCTACCACCGCGATAAGCTGGTCTCATCCGATAACATCATTAAGACCTGG  
CTGTTGGGCAAAGCAGTTAGCAATTTGAGCGAAGCCTCTTCGCGTTGCTGCGAAAATCCTCGACGCTGTCTATGCAG  
TATATGCACGAACGGGTGGAGCGCATTTCGTCGAAAGCCACCTGGTTGTCCGGAATTGGAGGCCCTCCTGGAGACC  
ACTGTTTACACTACAGTAGGGTGGATTTTTGCTCACACTGCGGTGGTGCACGTTACAGTGAAAGCCCATTAAAA  
GTACACCTTGTGAAAGTTGAGGAATCTGAGCTGCATACCTGGTTCTGTGAAAAAAACCATTATGGTTCGCTCCGTT  
ATCGAAAAATTCCTGAAAGCTGTGAATGATGAAAAACATAAAGGGATCCTGGACGCCCTGAGCGGTTTGTGGAT  
GGCCGTGGGCAACTGTTAAAAACTCAGCTCTAA

>HcTC-3\_amino\_acid

MSCSKEVRAPRKWVQRQREMOKVKVDDNLI SMDELI ELVVECGLCDEASVHKMYERTNTYQFMWTLIPTVPSDQW  
QFEIFKTSLHFLCALFLVDDAVESYSEKQMKEMSDAYDMLKQVCENFPFCFSPINEMKQSLKHLKPNPFDIASITF  
CMHYVNKIASVLVNEGSTPQNVVYFNRRRTSNAISISFQAVLIKAKLGSNVTGDEMLWRRVYDGLVILFYQFGE  
VLGLTKNTEKYMTVITELRLLGCLYICIVINDLYSYHRDKLVSSDNI IKTWLLGKAVSNLSEASSRCEILDVAMQ  
YMHVERVERIRQSHPGCPELEALLETTVYTTVGWIFAHTAVVPRYSESPLKVHLVEVEESELHTWFCEKNHYGRSV  
IEKFLKAVNDEKHKGILDALSGFVDGRGQLLKTQL\*

>PbTC-1\_nucleotide\_codon\_opt

ATGAGCTGCTCAAAAGAGATCCATGCGCCGCGCCGCTGGGTGGATCGTCATAAACAGATTCCGGTATTGCCGCAG  
AACCGGGTGGAAAAACTGATCTCTATGAATGAACTGATCGAGCTGGTCATTGAGTGTGGCCTGTGCGATAAAAACG  
TCGATTAATAAAAATGTATGACAAGATTAACACTTACCAGTTTATGTGGTGCATCGTGGACACCGTCCCTGCGAGC  
CAGTACGCGGAAGAAATTTTCAAAAGCTCATTACATTTCTTGTGCGCCTTATTCTTAGTAGACGATGCCGTAGAA  
AGCTACAGTGCTAATGAGATGCAGGACCTCAGCCGTTCTTATGATACCCTGGA AAAAGAGGTATGTAAAACCTTC  
CCGAACCTTCCGAGCATTAAACGAAATGAAGGAGTCACTGATGCATCTGCGCAATCCGTTTGTATCGTTCCCTCCATT  
ACTTTTTGCATGCAGTATGTTAATAAGATTACAGCAATCCTGCTGGAAGAGGGAAACACGCCGCATCATGTAGTT  
TATAATTTGCGTCGCGCACTTCGAACGCGATCTCTATTGCCTTTTCAGGCAGTCCCTGATTAAAAGCAAATGCCGGC  
AGCATCATTACCAGCCACGAAATGCTGTGGCGTCTGTTTTTCGATGGACTGGTTATTTTATTCTATCAGTTTGGGA  
GAACTGATCTCTGGTGCAACGGAGACGGCGCAGCAGCATATCGCAGTCCGTACCGAACTGCGCATGTTAGGTTGC  
CTGTATTGTATTGTTATCAATGATCTGTATTTCGATCAGCGTGACAAGCTGGCCTCCAGCGACAATATGATTAAA  
ACCTGGCTGCTGGAAAAACAGTAAGCAGCCTGTCCGAGGCCACTGCGCGTTGTAGCCAGATCCTGGACGCCATC  
ATGAAATATATGTATCAGCGCGTTCGAGCAATGTATCCAATCTAATCCGGGCTGCCCGCAATTGGAAAGCCTGTTG  
GAAACCACAATCTATACCACCGTTGGTTGGATTTCGCTCTCATACGACGGTTCGTTCCGCGTTACTCGGAAAGTCAA  
TTGAAAGTTGCACTGGTTCGAGGTTGAAGAGAAAGAACTGCCGAAGTGGCTCGCTGAAAAAGACGAATACGGCTGG  
AACGTTGTGAAAAAATTTGTCGAAACGCTGAATGACGAAAAACATAAAGGGCTGCTCGATGCACTCCAGGGCATT  
GCTGATGGGCGTGACCAACTGCTGAAGACCCAGCTCGATATTAGTTGA

>PbTC-1\_amino\_acid

MSCSKEIHAPRRWVDRHKQIPVLPQNAVEKLI SMNELIELVIECGLCDKTSINKMYDKINTYQFMWCIVDTPVPS  
QYAEEIFKSSLHFLCALFLVDDAVESYSANEMQDLRSYDTLEKEVCKTFPNFSPINEMKESLMHLRNPDRSSI  
TFMAYVNKITAILEEGNTPHHVVYVNLRRRTSNAISIAFQAVLIKSKCGSIIT SHEMLWRRVFDGLVILFYQFG  
ELISGATETAQQHIAVVTELRLMLGCLYICIVINDLYSYQRDKLASSDNMIK TWLLEKTVSSLSEATARCSQILDAI  
MKYMYQRVEQCIQSNPGCPQLESLETTIYTTVGWIRSHTTVVPRYSESQ LKVALVEVEEKELPKWLAEKDEYGW  
NVVEKFVETLNDEKHKGLLDALQGIADGRDQLLKTQLDIS\*

>RmTC-1\_nucleotide\_codon\_opt

ATGCTTCGTACGGAAGTGAAGATTCCGGAAGTATGGTGTATCCCCTGTGATCTGAAATGCAGCACGCCACCGCAG  
CTGAAAAAGGATATTATCGATTGGTGCCTCCGCACCGGCATCACCGCCGACCGTTCGTACAGCGGAGAAAAGCCCTT  
GATCGTCTGAAACCGTATATGTATATGAAAATCTTGTTCACAAAACCTGAAACCGGATAACCCGTTGATTGCTTCA  
TTGTACGAACTGAACGCTAGCGTAATTGTTACCGGCTTACCATGGACGATGTTCTGGAAACGTACACGCTGAGC  
GCCATTGAGGAGCTGGATCACACTTTTCGCGAAACTCAAACTGGTTGTCACCGCTGCCCCGAAGGACTACCCG  
GACTTGGATGCCATCCTCGACCACATTCCAAGCACAAAACCGCCTTATAGCCGGAGTGTGTTGCCATGTTTACC  
GACTACTTTAACCCTTATTGTGCCGCGATTACATACCGCGTACAAAACCCCTCCGAAACCGGTTTGGGCGCGTTTCGT  
CGCCGCTGGCGGCGCGGTAACCGCGTATCTGGAAATGGCCAAACGCAAACGTCGCCGCGACGTAATCTGCAT  
GAGGAAGAATTCTTATGGCAACGCAGTGCTGATAACCTGAGCTTTCCGGTGCTCATGCTGGCAGAAGTCTTCACC  
GGAATCCTGGCGGATGCAGATGTCCCGTTCGACTACCTTGCCTATTATCACTTTTACTCAAATTTATTCGCGATC  
GTACTGAACGATCTCAATAGCTATCATCGTGATAAAGATAACGACGACAACCTCTCTCGTTAAACTGTGGCTTAAA  
CTCGGCGTTGCTAAGGATTTTGTATGATGCCGCCACGAAGATTATTGACTTTCTGAACTCTATTATGGTGCAGGATG  
TATGTTGCGACGAAAGAAGTCTGGAGTCAAATCCGAGAAACGAAACCCCTCCGCGCTTCGTGGAAGCGGTGGGC  
TATACGTTCAACGGTTGGATCCTGGTACATAACAACCGCGGTTGAGCGTTACAAAACCTGAGCCCGTTCAGACGGTG  
GTTGCGCCGTTGGCGCGCGGTAAGAAGAAGTCTGGTTAAAGGGCGAAACGGCGTTGGCAAACGGTGCCTTGCA  
ATGTTTCAAGAGCTGATGGGTGAACGTGCCGAAGAATGAACAAGCTGTACGGGCTGGACTCCTAA

>RmTC-1\_amino\_acid

MLRTEVKIPEVWCIPCDLKCSTPPQLKKDIIIDWCVRTGITADRRTAEKALDRLKPYMYMKILFPKLKPDNPLIAS  
LYELNASVIVTGFTMDDVLETYTLSAIEELDHTFRETQNWLSPLPKDYPDLDAILDHIPPSTKPPYSRSVVMFT  
DYFNRYCAAHTAYKPSERLGAFFRRRLAAAVTAYLEMAKRKRDRDGNLHEEEFLWQRSADNLSFPVLMMLAEVFT  
GILADADVPSTTLHYHYFYSLNFAIVLNDLNSYHRDKDNDNSLVKLVKLVKLVAKDFDDAATKIIDFLNSIMVRM  
YVATKELLESNPENEPLRRFVEAVGYTFNGWILVHTTAVERYKLSPFQTVVAPVARGKEEVWLKGETAFGKRCVA  
MFEELMGERAEEMNKLYGLDS\*

>TmTC-1\_nucleotide\_codon\_opt

ATGGCGTGTGGGAAAGAACTGCGCATTCCTAAGGAATGGTTCGAAAGTACCACCATGCAATTGTGAATGAACCGATC  
GATCCGGAGCTGTTCTCATTAGACGAATTGTGTGCGTGGTTAAAAGACCTGGATTTATGCAACGACAAAATCTGAC  
GTGGAAAAATACGTGCTGGCTGTTTCGCCATATCATAACGATGCGCTATCAGTTTGTCTTGCTCAGCCGCGAAGAT  
GCCTTATGTAATAAATTTTAAAATGTGGGCCACACCGCGATTGCGGTTTTTATTTTCAGATGACGTGCTTGAG  
TGCCTTTCGAAAACCGAAATGGGCCAGATTTGCAATGCATTCCAGTTGCTGGTGGAGAAAACCGCTCCCAATTC  
TCACAATTTCTTACCATCGCGGAGATGAAACAGTTTCTCCTCTTACAGAAGGTGGATGTGAAGCTGATGCCTCAT  
ATTATCTATTTTCTTGATTTTCGCAATAATGTGGCAAAGCTTATCAACGAACAGGGCAATTACAGTAAGGAAGAC  
GTCTCGGATTACTGGCGCCGCTGGTTGTTATGATTTTCGCTGTATTACGAAGGTGTAAAGGTGGAGGTGAGCGGA  
TCGGGGGGTAGTTACAGCAAGGACATTTGGACGCGCCTGCTCGCTGCTGGTACCATGATTTGGCTGATTGCACAG  
GAAGTCATGAGCGGCGCCCTGGGCAAGACTAGCGAGCATGCTAGTTTACTGAATGAGCTGTACTTCTTAGGCACT  
TTCTACAGCATGGTCTGAAACGATATCTATAGCCATAATCGCGAAAACGGTTTCCATGGTTCTATTTGTAACCTT  
CTGCAGACAATTGTGCGTTCAAAGGATGTTCCCGGTGAATTTGAAGCGGTCCTGAAATGCATTCAGATCCTCAAC  
ACCGTTGTTAAACTGATGTACCAGAAGATTGAAACCGCCAAACAGAAAAATCTGGAGAATCGCGTCTGTGTAAA  
TTACTGGACAACATTGGTATGACCACTACCGGATGCTATTTTTTTCATCATTACAGTCATCGTTATGATGACTCG  
GCATGGCGCCTTTTCGTTGGTGAAGTTGACGACGATGAACTGGCGGAATGGCAGAAGTGCAGATGAAGAACAG  
CTGAAAGAAGTTATGCCGCTTCTGCTCAACTATTCTCAAAAAGCGAACGAAATCAGCGATACCATCAAACGGGGT  
GTTGTAATAAATTAACCGCCACTTTTCGGCAATGA

>TmTC-1\_amino\_acid

MACGKELRIPKEWSKYHHAIVNEPIDPELFLDELCAWLKDLDLCDKSDVEKYVLAVRPYHTMRYQFVLLSRED  
ALCKKLFKMWHAHTAIAVFI SDDVLECLSKTEMQICNAFQLLVEKTRPQFSQFSTIAEMKQFLLLQKVDVKLMPH  
IIYFLDFANNVAKLINEQGNYSKEDVSDYWRRLVVMISLYYEGVKVEVSGSGGSYSKDIWTRLLAAGTMIWLIAQ  
EVMGALGKTSEHASLLNELYFLGTFYSMVLNDIYSHNRENGFHGSICNLLQTIIVRSKDVPGFEAVLKCIIQLN  
TVVKLMYQKIETAKQKNLENRVLCKLLDNIGMTTTCYFFHHYSHRYDDSAWRLSLVEVDDDELAEWQKCDDEEQ  
LKEVMPLLLNYSQKANEISDTIKRGVVKINRHRQ\*

>TmTC-2\_nucleotide\_codon\_opt

ATGTCGTGCAGCAAGGAGATCCGCATCCCATCTGACTGGGCAAGTGTCCAGCGTAAAAAGTATGCAGGAGGGCCCC  
GATGAATCTCTGCTGGATTTTGAAGAACTTGCGAATTGGCTGCGTGAATGCGGGCGTAACCGATGATCAATGCAAA  
GTACGTAATATGTGCGACGCGACGCGTCCGGTTTTAAGCATTTCGCACCATTTCTGCGTGTTTTTCCGAACAATACC  
CTCTGTGCGCATGCATTTCAAATTCCTGACGCGAGTACACCATTGGGATTTACATCGACGATGACGTGCTGGAATCC  
CATTATCCGCTGGAAGTCTGAAAGAGATTTGCTACGAGTACGATCAGCTGGACGGTAAGCTGTTGGGCCAATTT  
CCGCAGATCCCGAGCCGTAAGGAACTCAAAAATTTTCTCGCACACTTAAAAAATGAAAAAGTATCTCAACGGTT  
ACCTTTTCATATGGACTTCGTCAATCGCGTACTGTTAACATCCTCCAAAATGGTGAATTTTCGGAAGAAGCGGTG  
CTGGAATTTTCGGCGTCCCTGAGTAATAATATTTCTTCTGTATCTGCAAGGTGTCCAGTATGAAAAACGTGGTGGC  
GGGGGAAACCATCCACCGTCTGGAGGCCTTATGGAATCGTGTTCGCGGGGGCGGCTGTGACTTGGCGGCTG  
TTTGGGGAAGTCCCATCAGGTACTCTGGGCAAGATTGGCGAGCATATCACCTGATCTCTGAACTGTACATCCTT  
TCAGCCCTGTACTGCATTGTGATTAATGATCTGTATAGTTACCATCGCGAAAATCGATGCGGTGCCGACCGCCGGC  
GAGAATTTGTTTCGCGTGTATGTTTAAACAAAAAGAGGTAGCCAACCTGACAGTCCCGCCGGTAAAGTTGCGTCT  
ATCTTAAACGAGATTACCAAATACACATATGAGCAGGTTTCGTGAGTTTAAAGCCTCATAACCGAACTCGTCTGAA  
CTGCATCAACTGTTTGACGATATTGGGTGTGGTACCGTGGGCTGGTACTATTTCCACGAGTGTACCAACCCTCGT  
TATAAAGAGAGCAATGTTTCGGATTAGTATGAAAGACGTAGACAAAAACGAAATCGAAGACTGGCTGTGACTAAA  
GATAGTTATGGCTGGAATATCGTTAAACAGTTTCTGGCCTCCTACGATGCCAAAAGCTAAGCGCCTGAACGATGCG  
GTCGCGTGTGCGATCCCGGCCTACGCTGAGACATTCTAA

>TmTC-2\_amino\_acid

MSCSKEIRIPSDWASVQRKSMQEGPDESLLDFEELANWLRECGVTDQCKVRKYVDATRPVLSIRTIILRVFPNNT  
LCRMHFKFLTQYTIIGIYIDDDVLESHYPLEVLKEICYEYDQLDGLKLLGQFPQIPSRKELKNFLAHLKNEKVIISTV  
TFHMDFVNVRVTVNQLQNGDFSEEAVLEFRRLSNNILLYLQGVQYKRGAGGKPSVVEALWNRVFGGAAVTWRL  
FGEVPSGTLGKIGEHITLISELYILSALYICIVINDLYSYHREIDAVPTAGENFVRVMFNQKEVANLTVAAKVAS  
ILNEITKYTYEQVREFKASYPNSELHQLFDDIGCGTVGWYFHECTNPRYKESNVRI SMKDVDKNEIEDWLSTK  
DSYGNVIVKQFLASYDAKAKRLNDAVACRIPAYAETF\*

>XsTC-1\_nucleotide\_codon\_opt

ATGTCGAAAAAACGTTGGTGCATCCCGATGAAGTGGGGTTCGATTGAGCGCGAAATTTTAAACAGAACACC  
ATCCCCGAGCTTGTGATACCAACCGTCTGATTAGTTGGGTAAAGGAATGCAATCTGGCTGATGAAGCACTGGTA  
ACTAAATACATGAACGTAATTCGGCCGTATCATTTTTTCGCGGCTGGTTTTTCCGATTCTGCCCGACAAAGACGTC  
TGTCGTGAAGCGTTTGCAGTGTATTGAAATTTCTGATCGTATTATATCTGTGTGATGACGAACTCGAGGCAAAA  
TGCAACCTGAATGAACTGGAAATCGTCTGTAGCGCGTACGATTTCTTAGATGAGAAGCTGAAACAATGTTCCCG  
CGGATTCCTTCTGTTGAGGAACTGCGTAGCTTTCTGCCTCACGTTAAAAAAGAACCGCTGCTGGCACTGGTTGTG  
TCCTTGATCGACAGCGTGTGCGGGTAGTCTCTCCGTTACTGAAGTATAGCGTGTTCGCGAGGAATCTGTATTT  
GACTTCCGTTGCCGTTTTAGTCACAGCCTGGGCTATAATCTCAAGGGCGTACTCCACGAAAAAAAATGTTGGGC  
GGTGAAGTAAAAACAACTGCTGTGGCGTTCGATTTTTGAAGGGGCCCGATCAGTTTCTGATGATTTAGAA  
ATTAGCTCCCTTTTCAGTGACCGGTTCCAACAACACATCCCGATTGCAACGGAGATGTACATTTTAAGCTCGCTG  
TGCTGCATGGTGACTAATGACGTGTACTCTTATCATCGTGAATGCAACGAAGGGCTGAAGGTTGATAATATTATT  
AGTCTCTGGCTGCATAATAAGCAGATCGCGTCTGTAGCAGAAGGCGTGAGCCGTATTAGTCGCATTTTTGAACTCC  
GCGGTCAAATATATGTTAGCCAAAGTAAAATCCATGAAAAGTGAATACCCCAATAATTTCAATGTGCAGACTTTG  
ACCGAGTTTATCGCGTTGAGCAGTGTGGGTTGGTTATATATGCACGACCAAGGCGTGCCTCGGTATTCGATAGT  
CCATGGCGTCTGAACCTGGTTCGATATTGAAGAATCGGACATTACCTCGTGGTTGGCTGAAAAAGATCCATACGCA  
GACGGCGTAATTGACCAATTTAAATACTCCAACCTGGACGCCAAAAAATTTATCGATTCTCTGTGCGAGAAGACC  
AGCGTTAGCGAGGAACAGTGAATGACTGA

>XsTC-1\_amino\_acid

MSEKNVVRIPMKWGRIEREILTQNTIPELVDTNRLISWVKECNLADEALVTKYMNIVIRPYHFSRLVFPILPKDV  
CREAFVAVFIEFLIVLYLCDDELEAKCNLNELEIVCSAYDFLDEKLLKQCFPRIPSVVEELRSFLPHVKKERLLALVV  
SLIDSVSRVVSPLLKYSVFPQESVDFRCRFRSHSLGYNLKGVLHEKKMLGGVSENKLLWRRIFEGAPITFLMYLE  
ISSLSVTGSNKHIPIATEMYILSSLCCMVTNDVYSYHRECNEGLKVDNII SLWLHNKQIASVAEGVSRISRI LNS  
AVKYMLAKVSMKSEYPNNFNVQTLTEFIALSSVGLWYMHDDQGVPRYSDSPWRLNLVDIEESDITSWLAEKDPYA  
DGVIDQFKYSNLDAKKFIDSLCEKTSVSEEQWND\*

## Supplementary References

1. Jeon, Y. *et al.* The Draft Genome of an Octocoral, *Dendronephthya gigantea*. *Genome Biol. and Evol.* **11**, 949–953 (2019).
2. Jiang, J. B. *et al.* A hybrid de novo assembly of the sea pansy (*Renilla muelleri*) genome. *Gigascience* **8**, (2019).
3. Kayal, E. *et al.* Phylogenomics provides a robust topology of the major cnidarian lineages and insights on the origins of key organismal traits. *BMC Evol. Biol.* **18**, 68 (2018).
4. Hu, M., Zheng, X., Fan, C.-M. & Zheng, Y. Lineage dynamics of the endosymbiotic cell type in the soft coral *Xenia*. *Nature* **582**, 534–538 (2020).
5. Zhou, Y. *et al.* The first draft genome of a cold-water coral *Trachythela* sp. (Alcyonacea: Stolonifera: Clavulariidae). *Genome Biol. Evol.* (2020) **13**, evaa265 (2021)..
6. Ledoux, J.-B. *et al.* The Genome Sequence of the Octocoral *Paramuricea clavata* – A Key Resource To Study the Impact of Climate Change in the Mediterranean. *G3: Genes, Genom., Genet.* **10**, 2941–2952 (2020).
7. Simion, P. *et al.* A Large and Consistent Phylogenomic Dataset Supports Sponges as the Sister Group to All Other Animals. *Curr. Biol.* **27**, 958–967 (2017).
8. Zubìa, E., Spinella, A., Giusto, G. B., Crispino, A. & Cimino, G. A new diterpenoid skeleton from the Mediterranean octocoral *Alcyonium palmatum*: Structure of palmatol. *Tetrahedron Lett.* **35**, 7069–7072 (1994).
9. Manzo, E. *et al.* A new xenicane norditerpene from the Indian marine gorgonian *Acanthogorgia turgida*. *Nat. Prod. Res.* **23**, 1664–1670 (2009).
10. Rivera-García, L., Rivera-Vicéns, R. E., Veglia, A. J. & Schizas, N. V. De novo transcriptome assembly of the digitate morphotype of *Briareum asbestinum* (Octocorallia: Alcyonacea) from the southwest shelf of Puerto Rico. *Mar. Genom.* **47**, 100676 (2019).

11. Coval, S. J., Cross, S., Bernardinelli, G. & Jefford, C. W. Brianthein V, a New Cytotoxic and Antiviral Diterpene Isolated from *Briareum asbestinum*. *J. Nat. Prod.* **51**, 981–984 (1988).
12. Dookran, R. *et al.* Briarane and asbestinane diterpenes from *Briareum asbestinum*. *Tetrahedron* **50**, 1983–1992 (1994).
13. DeLeo, D. M., Glazier, A., Herrera, S., Barkman, A. & Cordes, E. E. Transcriptomic Responses of Deep-Sea Corals Experimentally Exposed to Crude Oil and Dispersant. *Front. Mar. Sci.* **8**, (2021).
14. Khalturin, K. *et al.* Medusozoan genomes inform the evolution of the jellyfish body plan. *Nat. Ecol. Evol.* **3**, 811–822 (2019).
15. Iguchi, K., Fukaya, T., Yasumoto, A. & Watanabe, K. New Marine Sesquiterpenoids and Diterpenoids from the Okinawan Soft Coral *Clavularia koellikeri*. *J. Nat. Prod.* **67**, 577–583 (2004).
16. Iwashima, M., Matsumoto, Y., Takahashi, H. & Iguchi, K. New Marine Cembrane-type Diterpenoids from the Okinawan Soft Coral *Clavularia koellikeri*. *J. Nat. Prod.* **63**, 1647–1652 (2000).
17. Pratlong, M. *et al.* The red coral (*Corallium rubrum*) transcriptome: a new resource for population genetics and local adaptation studies. *Mol. Ecol. Resources* **15**, 1205–1215 (2015).
18. Schwartz, R. E., Scheuer, P. J., Zabel, V. & Watson, W. H. The coraxeniolides, constituents of pink coral, *Corallium* sp. *Tetrahedron* **37**, 2725–2733 (1981).
19. Ma, A. *et al.* Dendronpholides A–R, Cembranoid Diterpenes from the Chinese Soft Coral *Dendronephthya* sp. *J. Nat. Prod.* **71**, 1152–1160 (2008).
20. Elkhayat, E. S., Ibrahim, S. R. M., Fouad, M. A. & Mohamed, G. A. Dendronephthols A–C, new sesquiterpenoids from the Red Sea soft coral *Dendronephthya* sp. *Tetrahedron* **70**, 3822–3825 (2014).

21. Ryu, T. *et al.* First transcriptome assembly of the temperate azooxanthellate octocoral *Eleutherobia rubra*. *Mar. Genom.* **48**, 100682 (2019).
22. Lindel, T. *et al.* Eleutherobin, a New Cytotoxin that Mimics Paclitaxel (Taxol) by Stabilizing Microtubules. *J. Am. Chem. Soc.* **119**, 8744–8745 (1997).
23. Fuess, L. E., Mann, W. T., Jinks, L. R., Brinkhuis, V. & Mydlarz, L. D. Transcriptional analyses provide new insight into the late-stage immune response of a diseased Caribbean coral. *R. Soc. Open Sci.* **5**, 172062.
24. Look, S. A., Fenical, W., Zheng, Q. T. & Clardy, J. Calyculones, new cubitane diterpenoids from the Caribbean gorgonian octocoral *Eunicea calyculata*. *J. Org. Chem.* **49**, 1417–1423 (1984).
25. Romiguier, J. *et al.* Comparative population genomics in animals uncovers the determinants of genetic diversity. *Nature* **515**, 261–263 (2014).
26. Mancini, I., Guella, G., Zibrowius, H. & Pietra, F. Configuration, Conformation, and Reactivity of Highly Functionalized Eunicellane Diterpenes Isolated from the Gorgonians *Eunicella cavolinii* and *Eunicella singularis* from Marseille. *Helv. Chim. Acta* **83**, 1561–1575 (2000).
27. Tsitsimpikou, C., Vagias, C. & Roussis, V. A New Epoxymurolane Metabolite from the Soft Coral *Gorgonia ventalina*. *Nat. Prod. Lett.* **14**, 17–23 (1999).
28. Hongo, Y., Yasuda, N. & Nagai, S. Identification of Genes for Synthesis of the Blue Pigment, Biliverdin IX $\alpha$ , in the Blue Coral *Heliopora coerulea*. *The Biological Bulletin* (2017) doi:10.1086/692661.
29. Tanaka, J., Ogawa, N., Liang, J., Higa, T. & Gravalos, D. G. Helioporins: bioactive diterpenes from the blue coral *Heliopora coerulea*. *Tetrahedron* **49**, 811–822 (1993).
30. DeLeo, D. M. *et al.* Gene expression profiling reveals deep-sea coral response to the Deepwater Horizon oil spill. *Mol. Ecol.* **27**, 4066–4077 (2018).

31. Reddy, N. S., Reed, J. K., Longley, R. E. & Wright, A. E. Two New Cytotoxic Linderazulenes from a Deep-Sea Gorgonian of the Genus *Paramuricea*. *J. Nat. Prod.* **68**, 248–250 (2005).
32. Vargas, S., Zimmer, T., Conci, N., Lehmann, M. & Wörheide, G. Resilience to climate change in an octocoral involves the transcriptional decoupling of the calcification and stress response toolkits. *bioRxiv* 2020.07.15.202069 (2020)  
doi:10.1101/2020.07.15.202069.
33. Barsby, T. & Kubanek, J. Isolation and Structure Elucidation of Feeding Deterrent Diterpenoids from the Sea Pansy, *Renilla reniformis*. *J. Nat. Prod.* **68**, 511–516 (2005).
34. Liu, Z. *et al.* Capnosane-type cembranoids from the soft coral *Sarcophyton trocheliophorum* with antibacterial effects. *Tetrahedron* **70**, 8703–8713 (2014).
35. Conci, N., Wörheide, G. & Vargas, S. New Non-Bilaterian Transcriptomes Provide Novel Insights into the Evolution of Coral Skeletomes. *Genome Biol. Evol.* **11**, 3068–3081 (2019).
36. Ahmed, A. F. *et al.* Oxygenated Cembranoids from a Formosan Soft Coral *Sinularia gibberosa*. *J. Nat. Prod.* **71**, 179–185 (2008).
37. Iguchi, K., Mori, K., Suzuki, M., Takahashi, H. & Yamada, Y. New Marine Furanosesquiterpenoids, Tubipofuran and 15-Acetoxytubipofuran from the Stolonifer *Tubipora musica* Linnaeus. *Chem. Lett.* **15**, 1789–1792 (1986).
38. Cheng, Y.-B., Jang, J.-Y., Khalil, A. T., Kuo, Y.-H. & Shen, Y.-C. Xenicane-Type Diterpenes with Cytotoxicity from *Xenia florida*. *J. Nat. Prod.* **69**, 675–678 (2006).
39. Aaron, J. A., Lin, X., Cane, D. E. & Christianson, D. W. Structure of Epi-Isozizaene Synthase from *Streptomyces coelicolor* A3(2), a Platform for New Terpenoid Cyclization Templates. *Biochemistry* **49**, 1787–1797 (2010).
40. Köksal, M., Chou, W. K. W., Cane, D. E. & Christianson, D. W. Structure of 2-Methylisoborneol Synthase from *Streptomyces coelicolor* and Implications for the

- Cyclization of a Noncanonical C-Methylated Monoterpenoid Substrate. *Biochemistry* **51**, 3011–3020 (2012).
41. Vedula, L. S. *et al.* Exploring biosynthetic diversity with trichodiene synthase. *Arch. Biochem. Biophys.* **466**, 260–266 (2007).
  42. Challis, R., Richards, E., Rajan, J., Cochrane, G. & Blaxter, M. BlobToolKit – Interactive Quality Assessment of Genome Assemblies. *G3 Genes Genom. Genet.* **10**, 1361–1374 (2020).
  43. Buchfink, B., Reuter, K. & Drost, H.-G. Sensitive protein alignments at tree-of-life scale using DIAMOND. *Nat. Methods* **18**, 366–368 (2021).
  44. Nasuda, M., Ohmori, M., Ohyama, K. & Fujimoto, Y. Revision of the Stereochemistry of Elisabethatriene, a Putative Biosynthetic Intermediate of Pseudopterisins. *Chem. Pharm. Bulletin* **60**, 681–685 (2012).
  45. Coleman, A. C. & Kerr, R. G. Radioactivity-Guided Isolation and Characterization of the Bicyclic Pseudopterisins Diterpene Cyclase Product from *Pseudopterogorgia elisabethae*. *Tetrahedron* **56**, 9569–9574 (2000).
  46. Lazerwith, S. E., Johnson, T. W. & Corey, E. J. Syntheses and Stereochemical Revision of Pseudopterisins G–J Aglycon and Helioporin E. *Org. Lett.* **2**, 2389–2392 (2000).
  47. Chen, B.-W. *et al.* Klysimplexins I–T, eunicellin-based diterpenoids from the cultured soft coral *Klyxum simplex*. *Org. Biomol. Chem.* **9**, 834–844 (2011).
  48. Rinkel, J., Lauterbach, L., Rabe, P. & Dickschat, J. S. Two Diterpene Synthases for Spiroalbatene and Cembrene A from *Allokutzneria albata*. *Angew. Chem. Int. Ed.* **57**, 3238–3241 (2018).
  49. Huber, T., Weisheit, L. & Magauer, T. Synthesis of Xenia diterpenoids and related metabolites isolated from marine organisms. *Beilstein J. Org. Chem.* **11**, 2521–2539 (2015).



50. Angulo-Preckler, C. *et al.* Gersemiols A–C and Eunicellol A, Diterpenoids from the Arctic Soft Coral *Gersemia fruticosa*. *J. Nat. Prod.* **79**, 1132–1136 (2016).
51. Meyers, A. I. & Bienz, S. Asymmetric total synthesis of (+)- $\Delta$ -9(12)-capnellene. *J. Org. Chem.* **55**, 791–798 (1990).
